# Supplementary material for: Synthesis, biological evaluation, and structure–activity relationships of tri- and tetrasubstituted olefins related to isocombretastatin A-4 as new tubulin inhibitors
Source: Royal Society of Chemistry journal article supplement (doi:10.1039/c2ob26253c), 2012-09-20

Supporting Information

For

**Synthesis, Biological Evaluation, and Structure-Activity Relationships of Tri- and Tetrasubstituted Olefins Related to *iso*Combretastatin A-4 as New Tubulin Inhibitors**

*Jessy Aziz,<sup>a</sup> Etienne Brachet,<sup>a</sup> Abdallah Hamze,<sup>\*a</sup> Jean-François Peyrat,<sup>a</sup> Guillaume Bernadat,<sup>a</sup> Estelle Morvan,<sup>a</sup> Jérôme Bignon,<sup>b</sup> Joanna Wdzieczak-Bakala,<sup>b</sup> Déborah Desravines,<sup>b</sup> Joelle Dubois,<sup>b</sup> Marie Tueni,<sup>c</sup> Ahmad Yassine,<sup>c</sup> Jean-Daniel Brion,<sup>a</sup> and Mouad Alami<sup>\*a</sup>*

*Univ. Paris-Sud, BioCIS UMR 8076, Laboratoire de Chimie Thérapeutique, Faculté de Pharmacie, 5 rue J.-B. Clément, Châtenay-Malabry, F-92296, France.*

**List of Contents**

|                                                                                                                 |           |
|-----------------------------------------------------------------------------------------------------------------|-----------|
| <b>SUPERIMPOSITION OF GEOMETRIES FOR COMPOUNDS 3J (A), 3K (B), 3L (C) AND 4B WITH AND WITHOUT PROTEIN .....</b> | <b>2</b>  |
| <b><sup>1</sup>H NMR AND <sup>13</sup>C SPECTRA OF HYDRAZONES COMPOUNDS .....</b>                               | <b>3</b>  |
| <b><sup>1</sup>H NMR AND <sup>13</sup>C SPECTRA OF TRI- AND TETRASBTITUTED OLEFINS .....</b>                    | <b>11</b> |

### Superimposition of geometries for compounds **3j** (a), **3k** (b), **3l** (c) and **4b** with and without protein

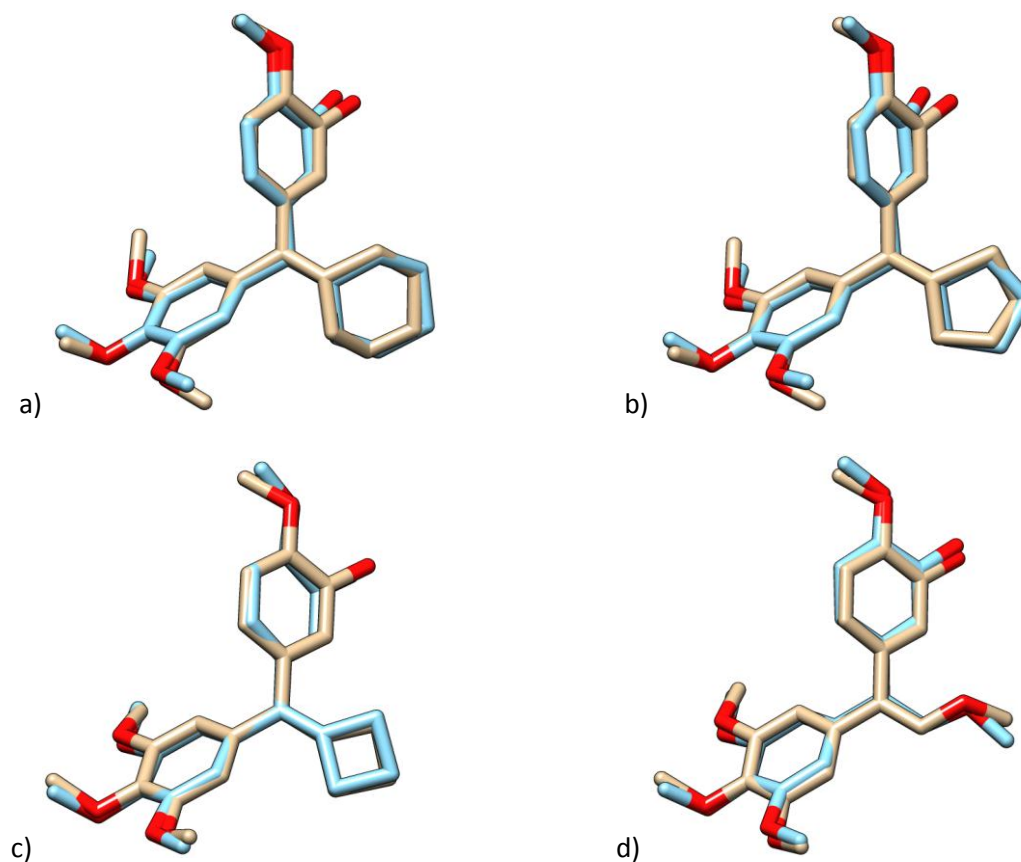

**Figure S1.** Superimposition of geometries for compounds **3j** (a), **3k** (b), **3l** (c) and **4b** (d) as docked in the colchicine binding site (brown color) and optimized without the protein to the closest B3LYP/6-31G\* energy minimum (blue color). Respective RMSD within each subfigure are 0.54, 0.66, 0.50 and 0.52 Å.

**<sup>1</sup>H NMR and <sup>13</sup>C Spectra of hydrazones compounds**

2012-04-12  
JA13  
Proton.4 CDCl3 D:\\ chit 14

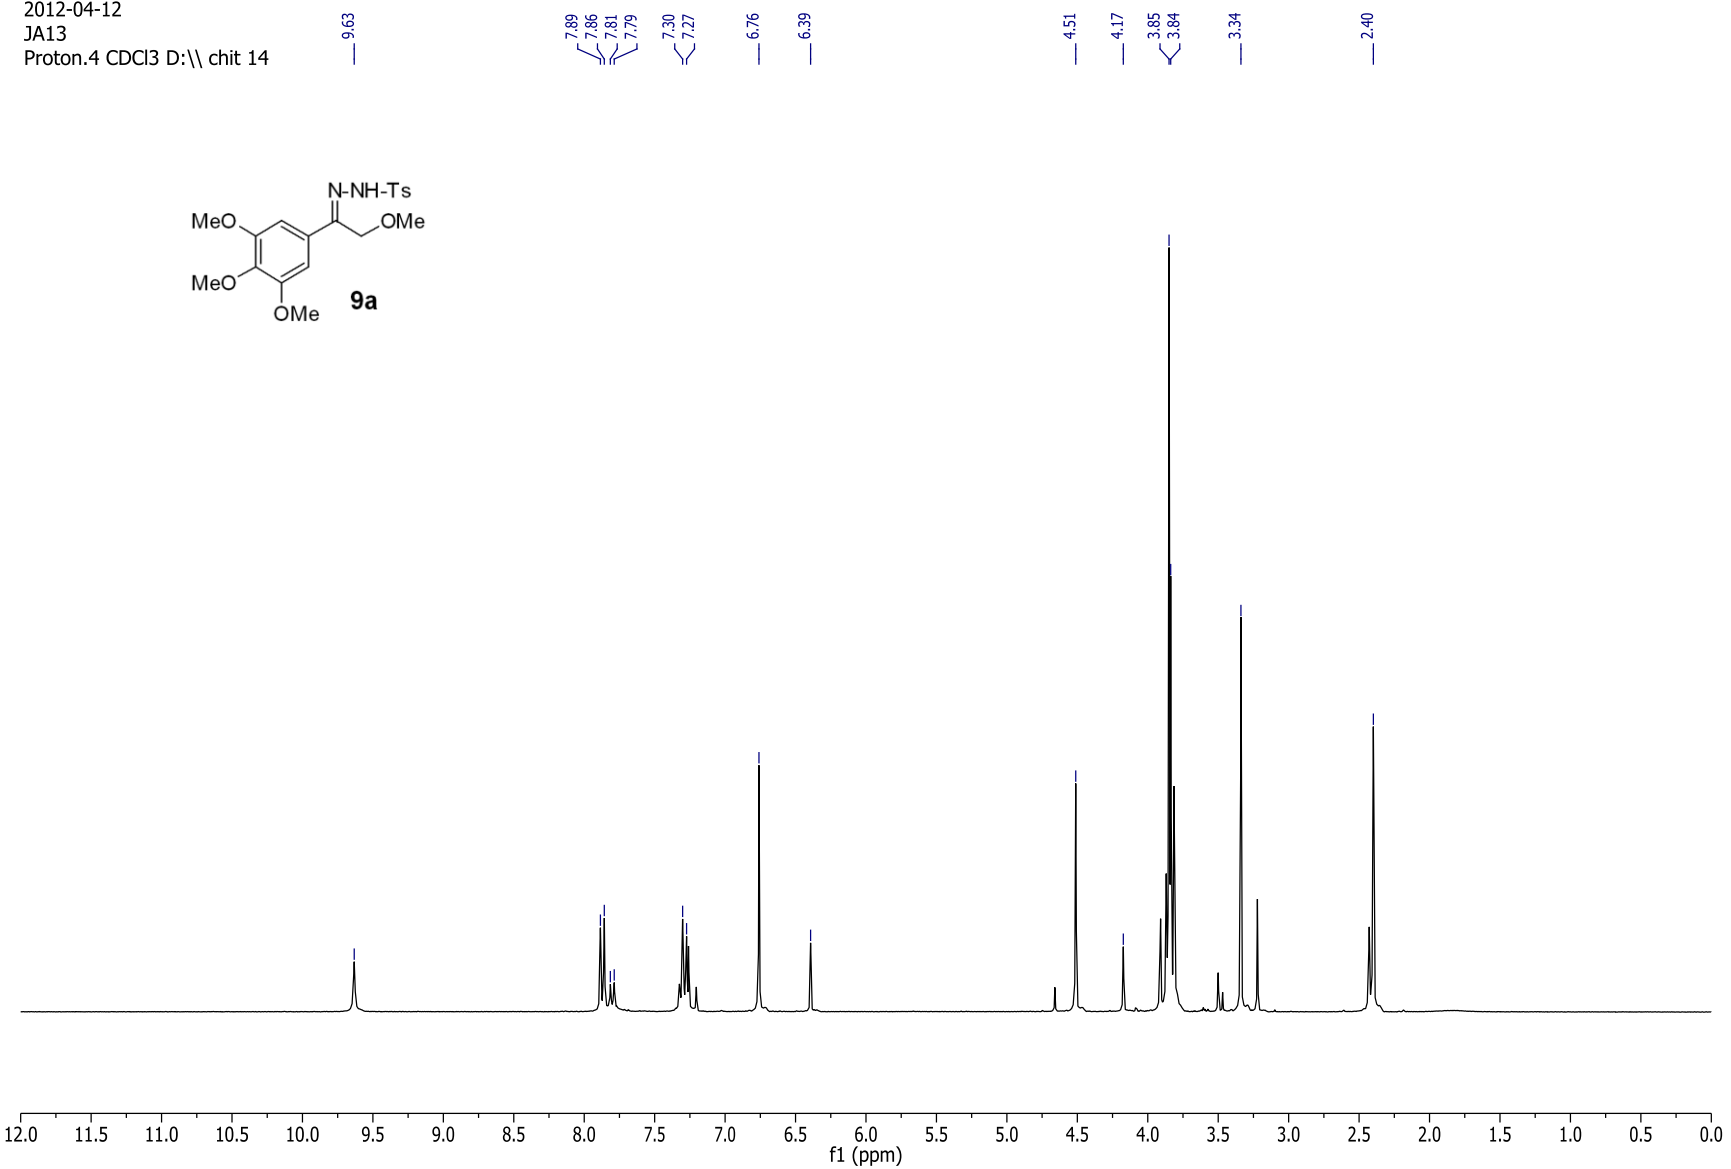

2012-02-21  
JA13  
JMOD CDCl3 D:\\ chit 31

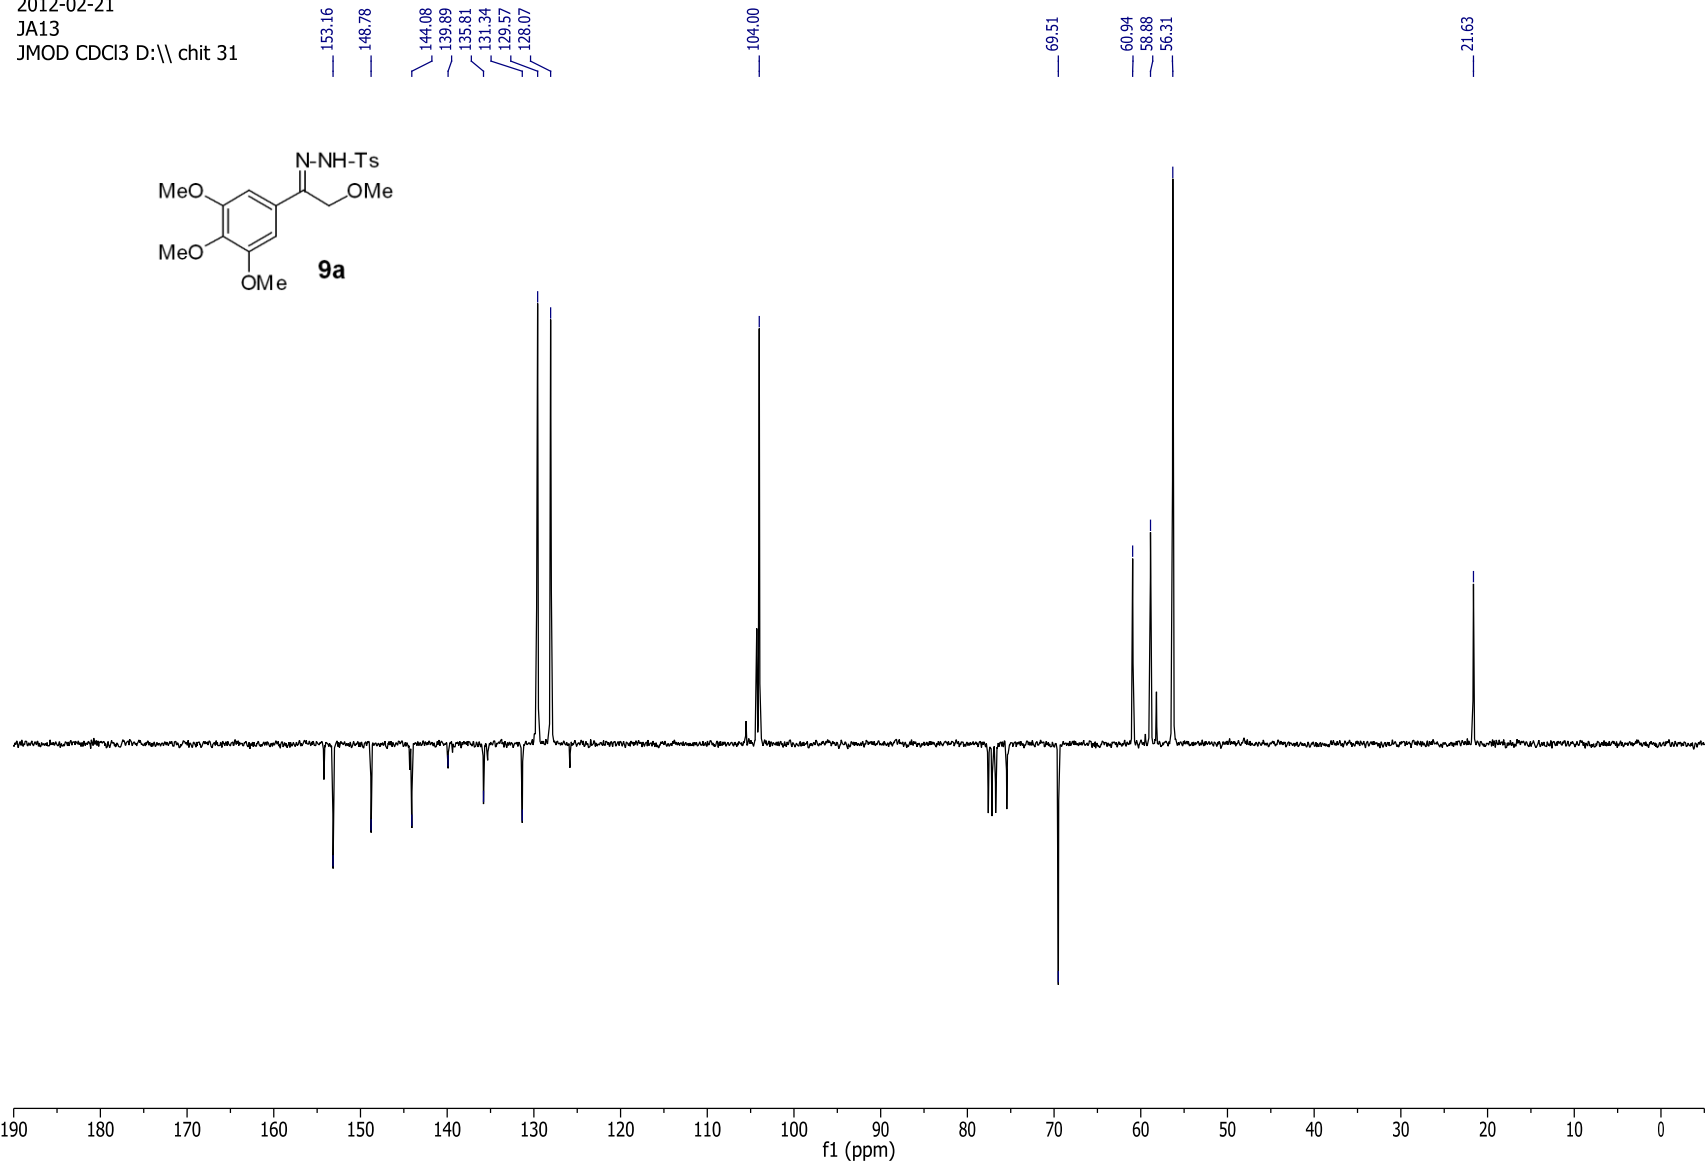

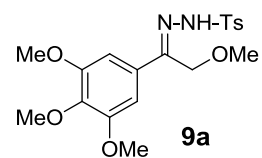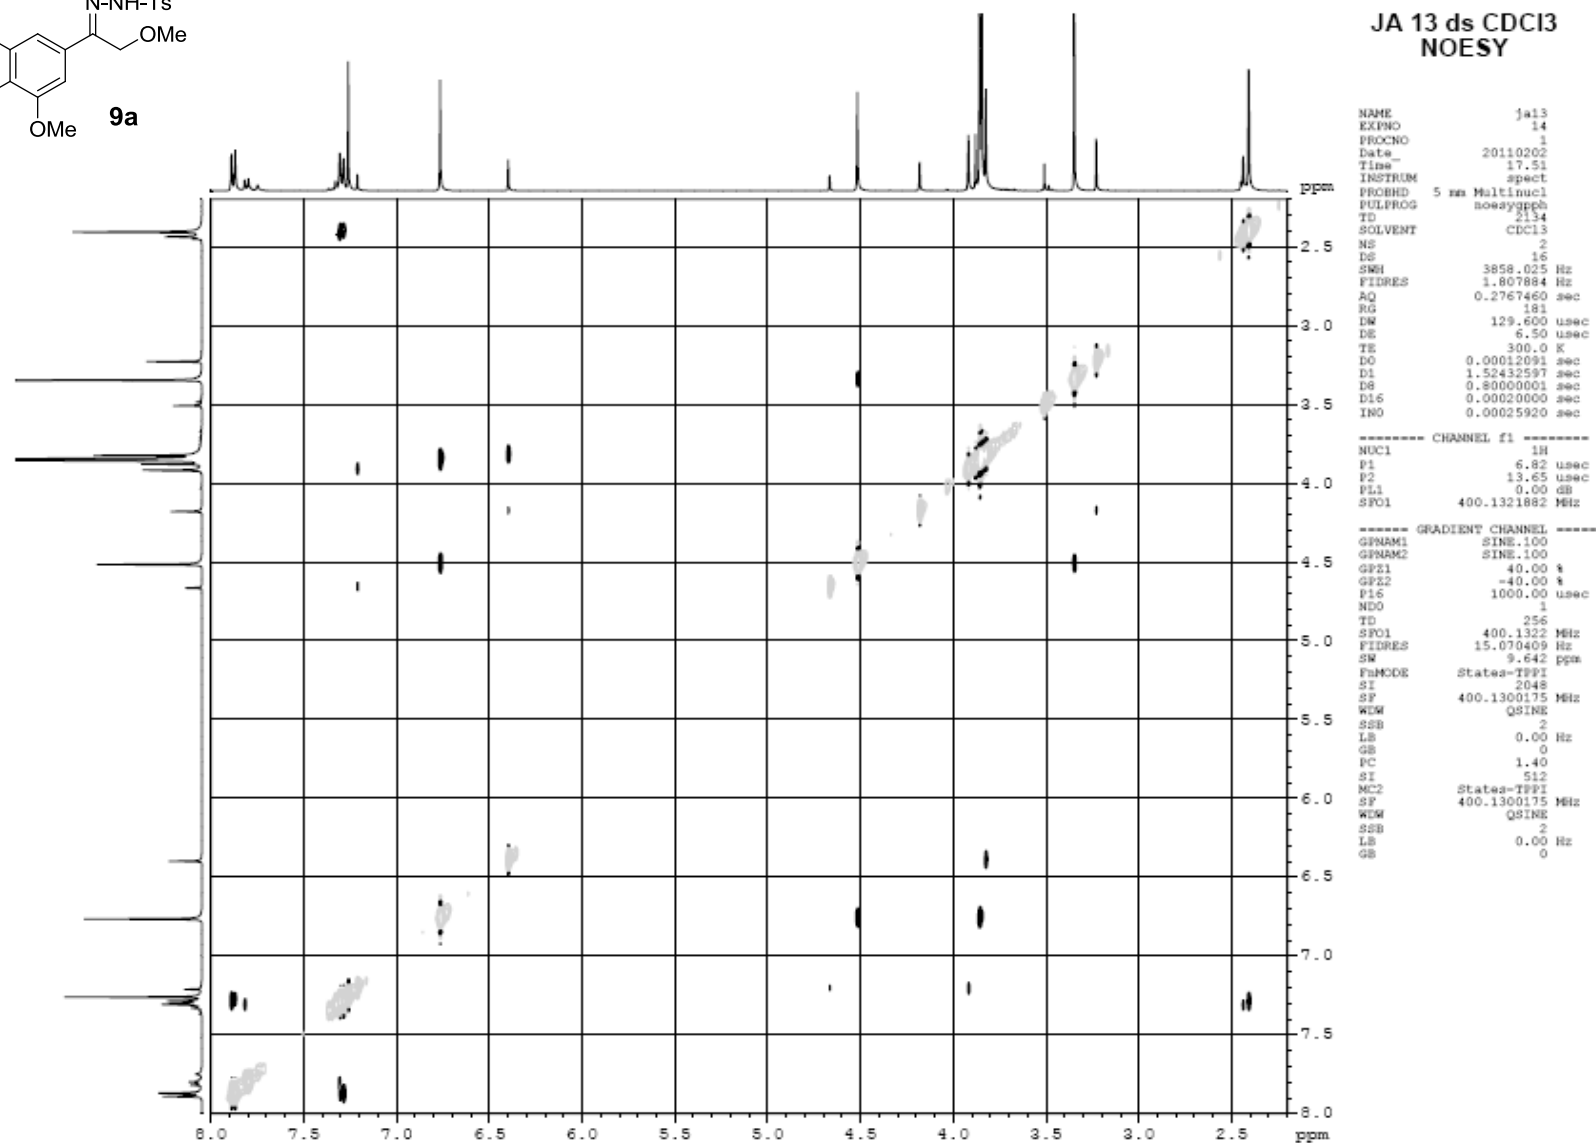

2011-05-03  
JA30  
PROTON CDCl3 d:\ d31 56

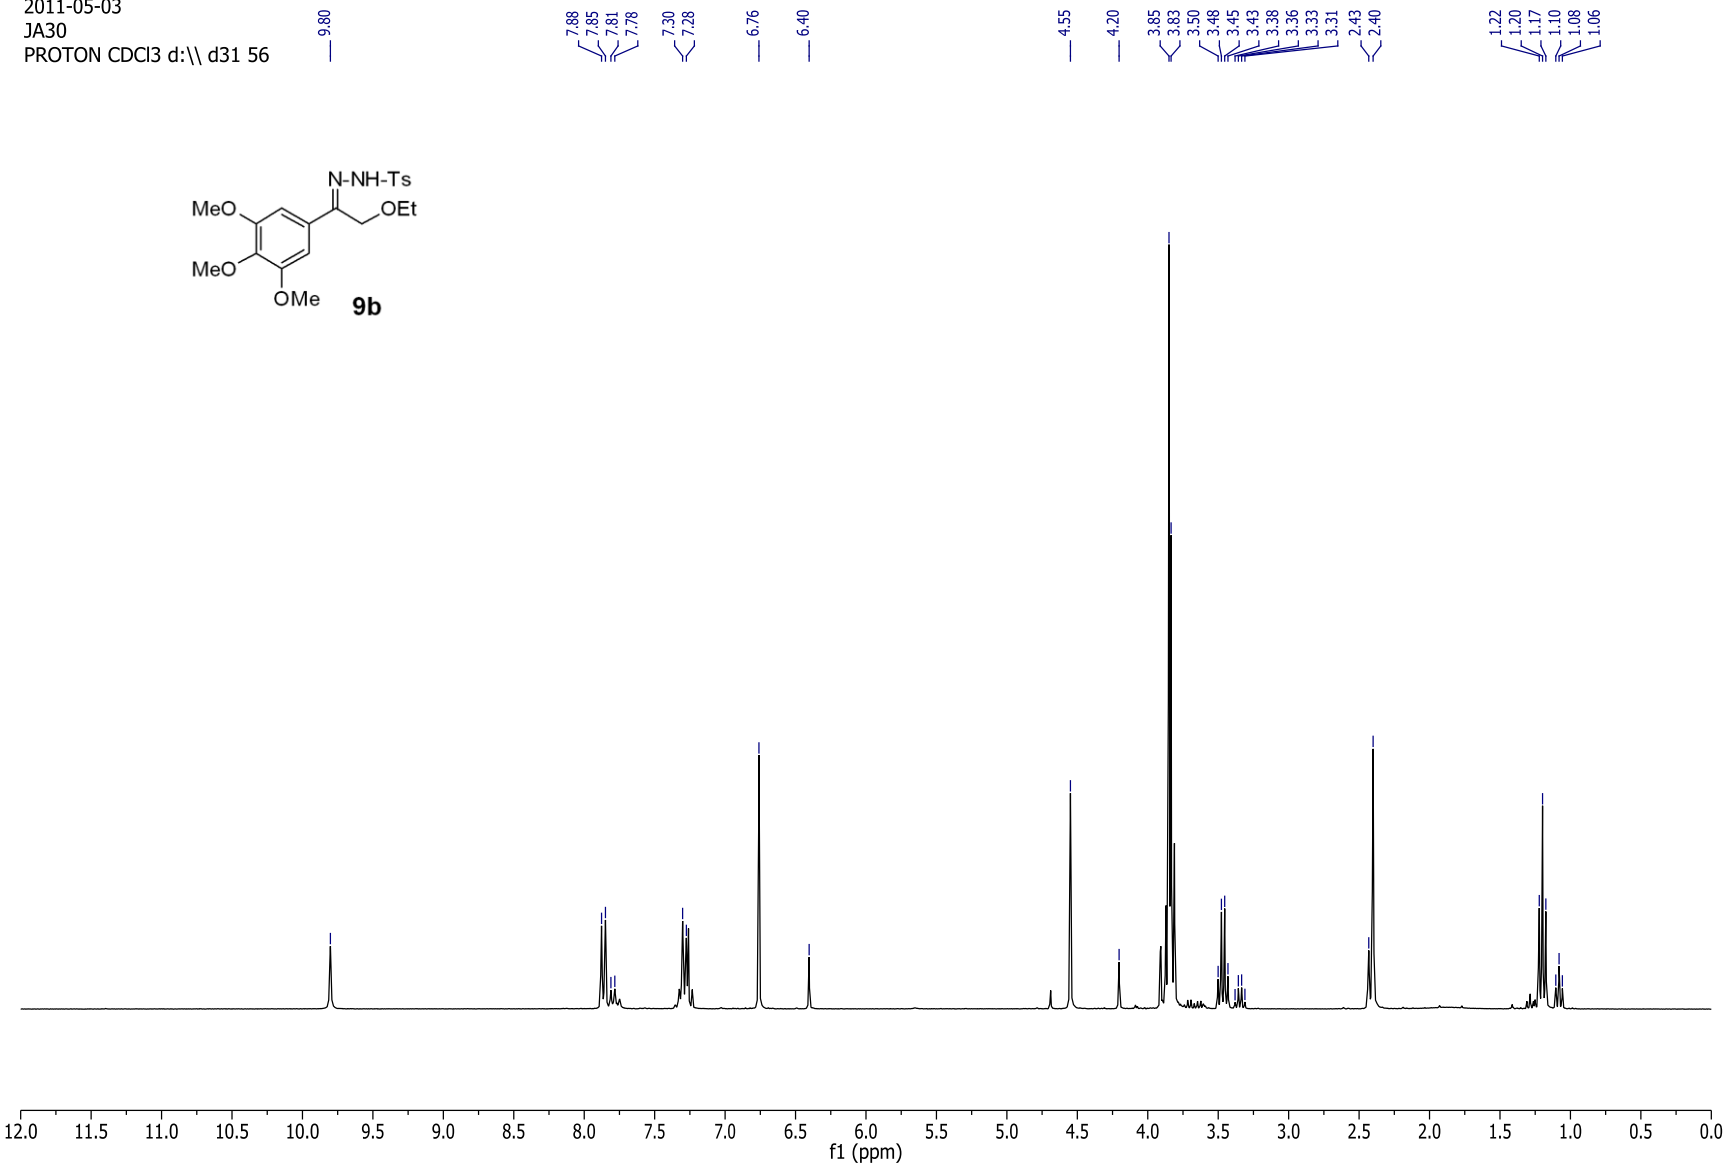

2011-05-03  
JA30  
JMOD CDCl3 d:\ d31 56

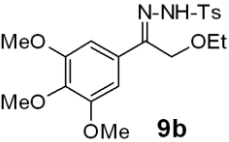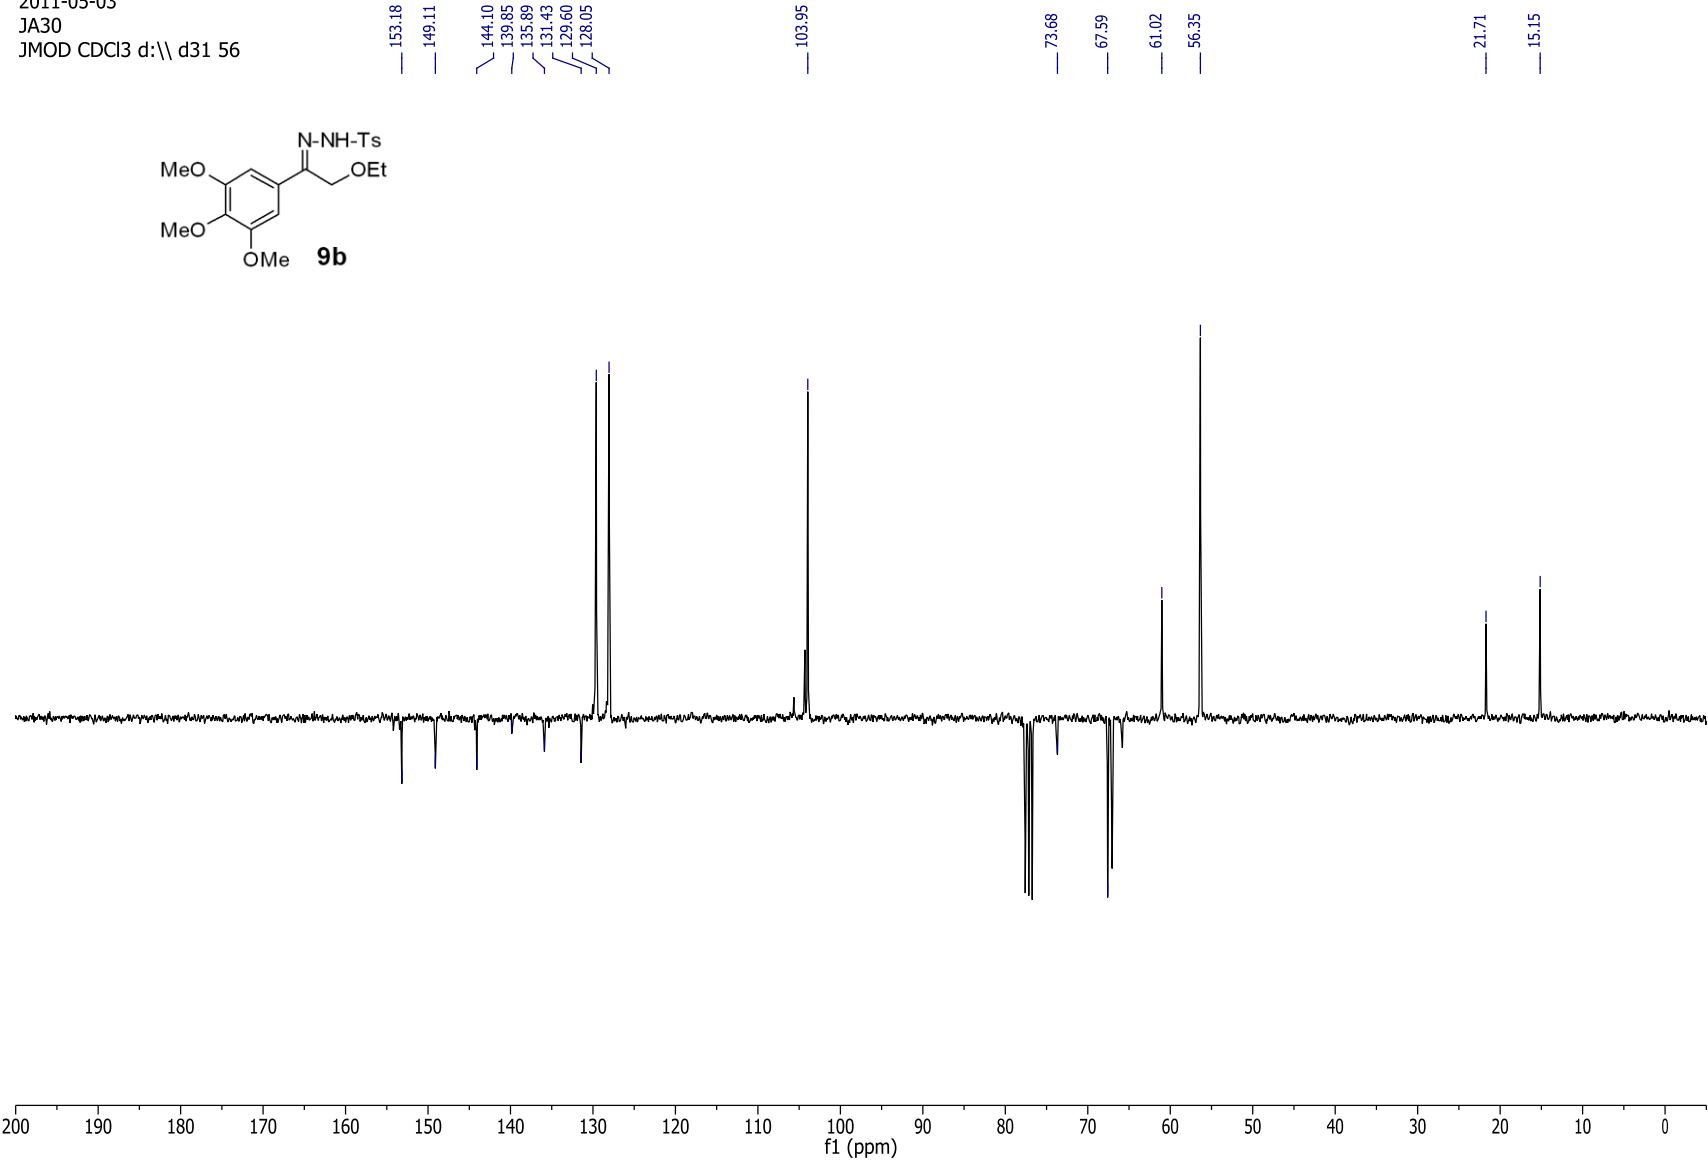



2011-05-02  
JA59  
PROTON CDCl3 d:\ d31 52

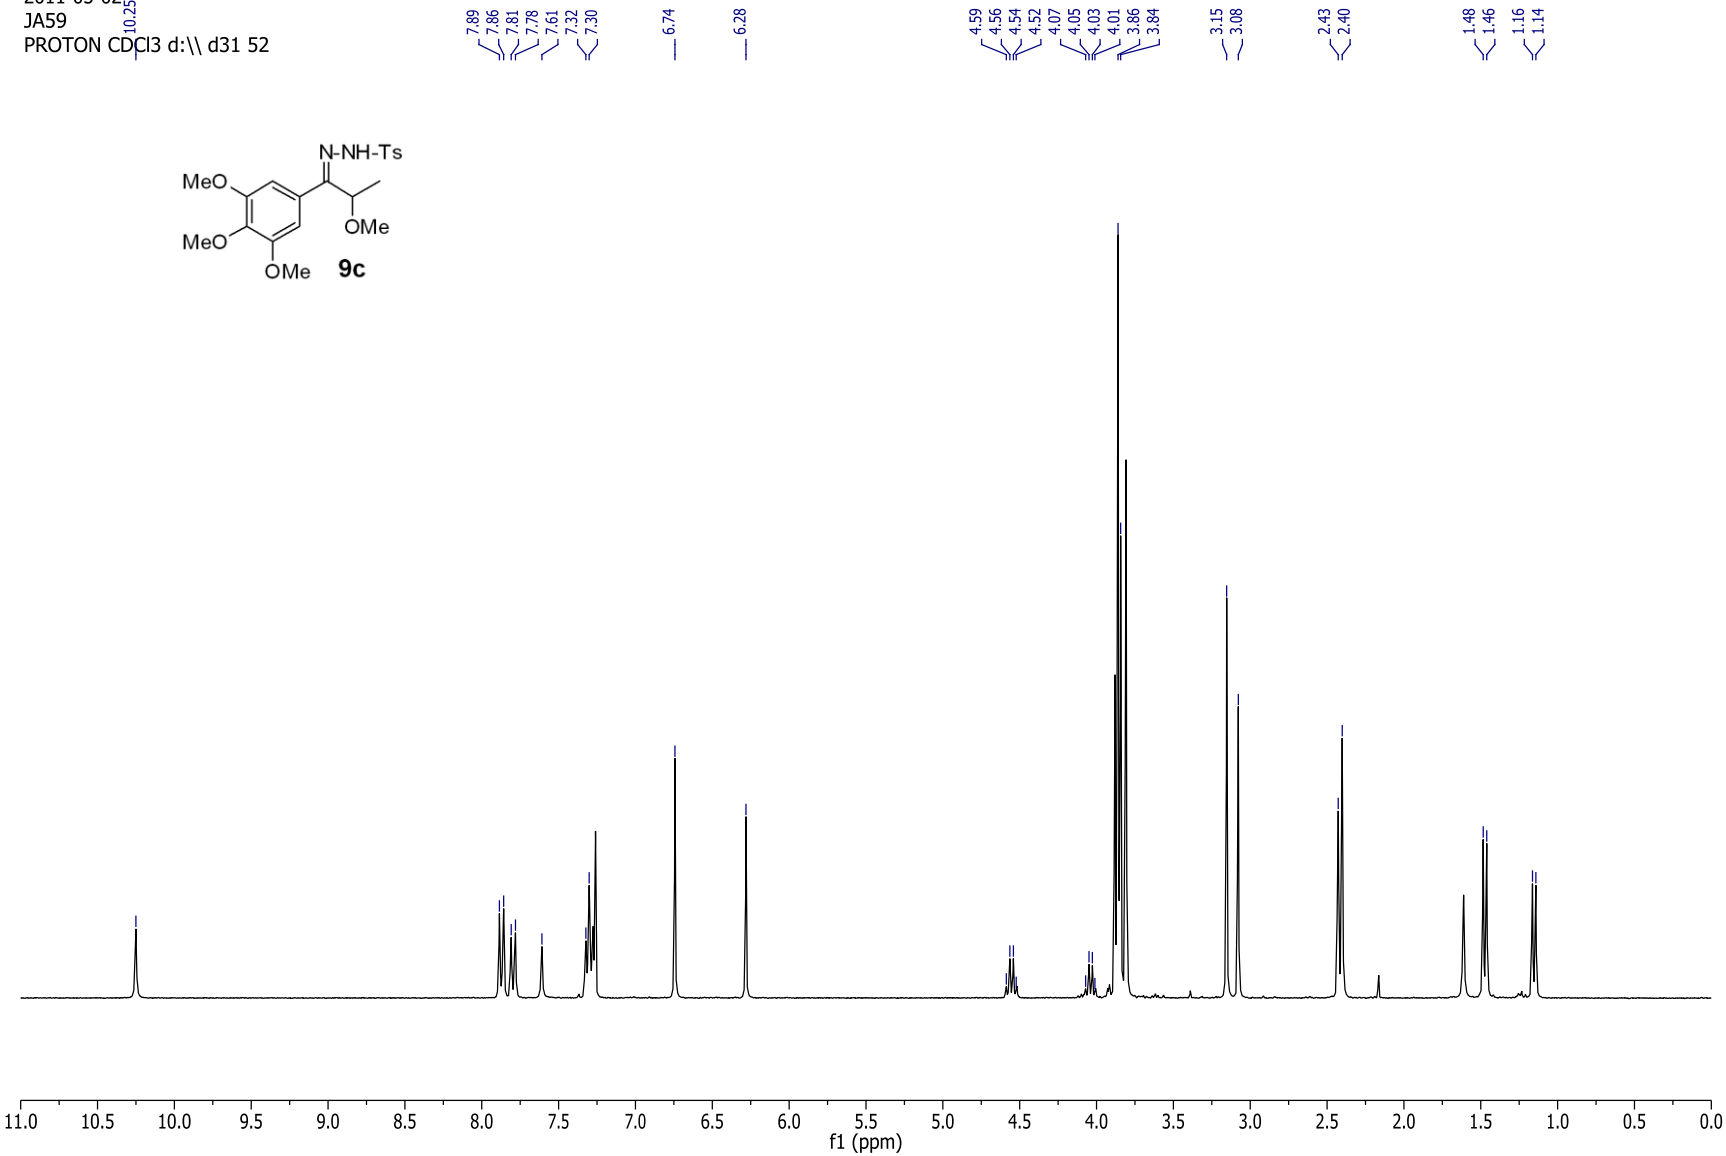

2011-05-02  
JA59  
JMOD CDCl3 d:\ d31 52

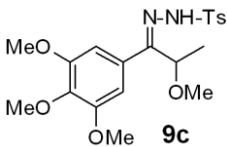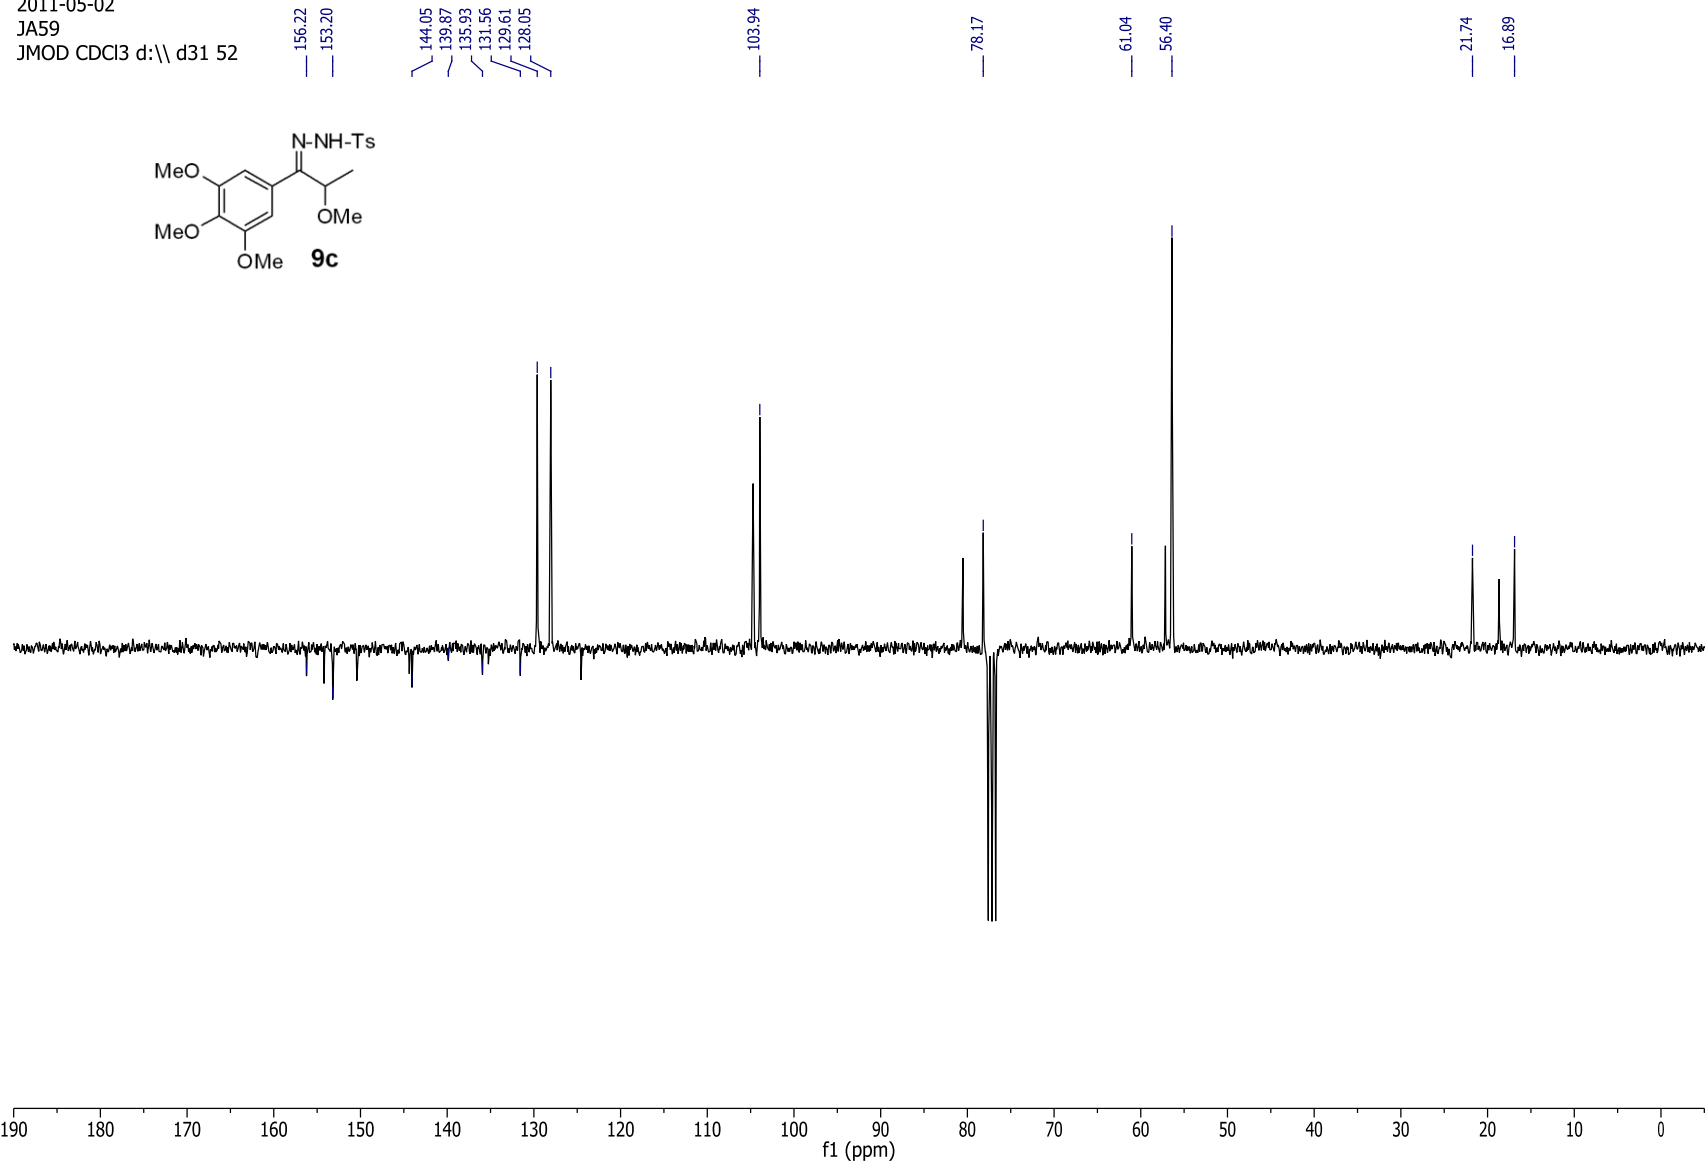

## **$^1\text{H}$ NMR and $^{13}\text{C}$ Spectra of Tri- and Tetrasbtituted Olefins**

2011-02-24  
JA38 P  
PROTON Acetone d: $\backslash$  d31 7

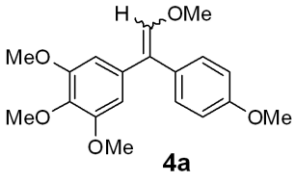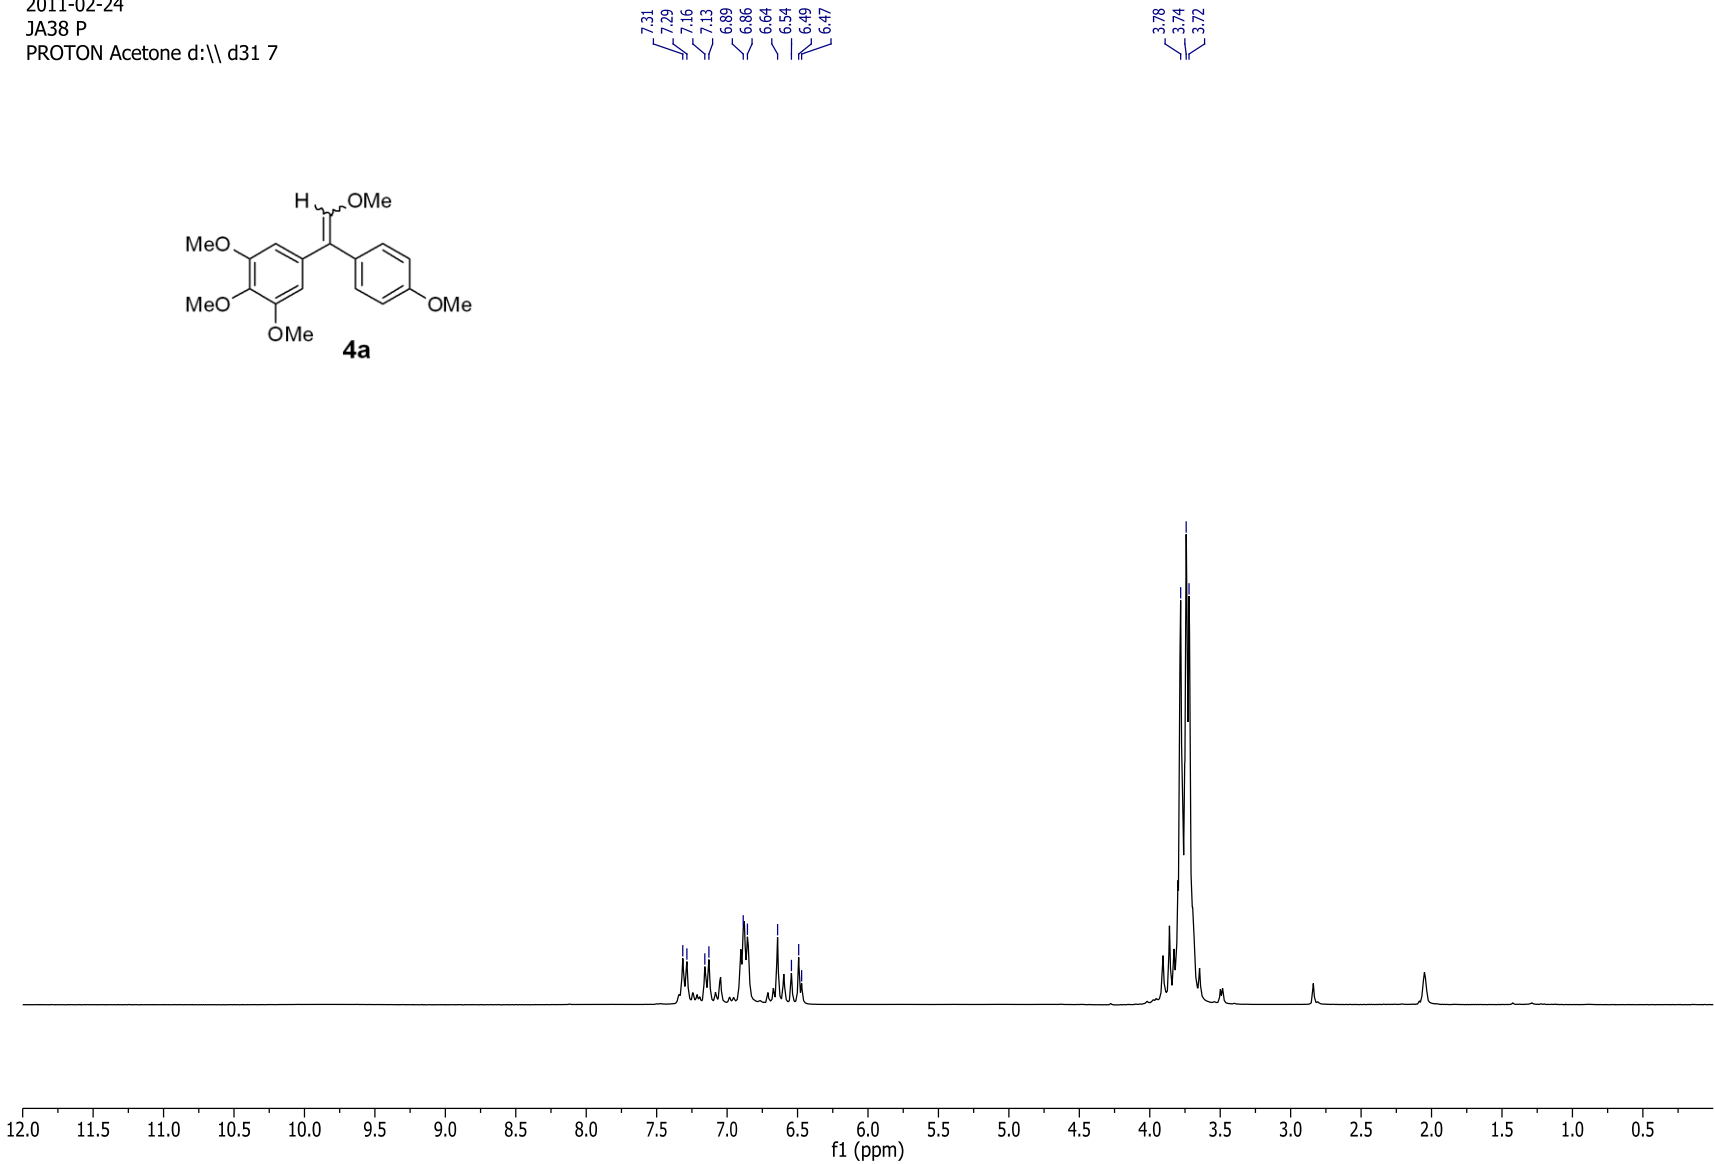

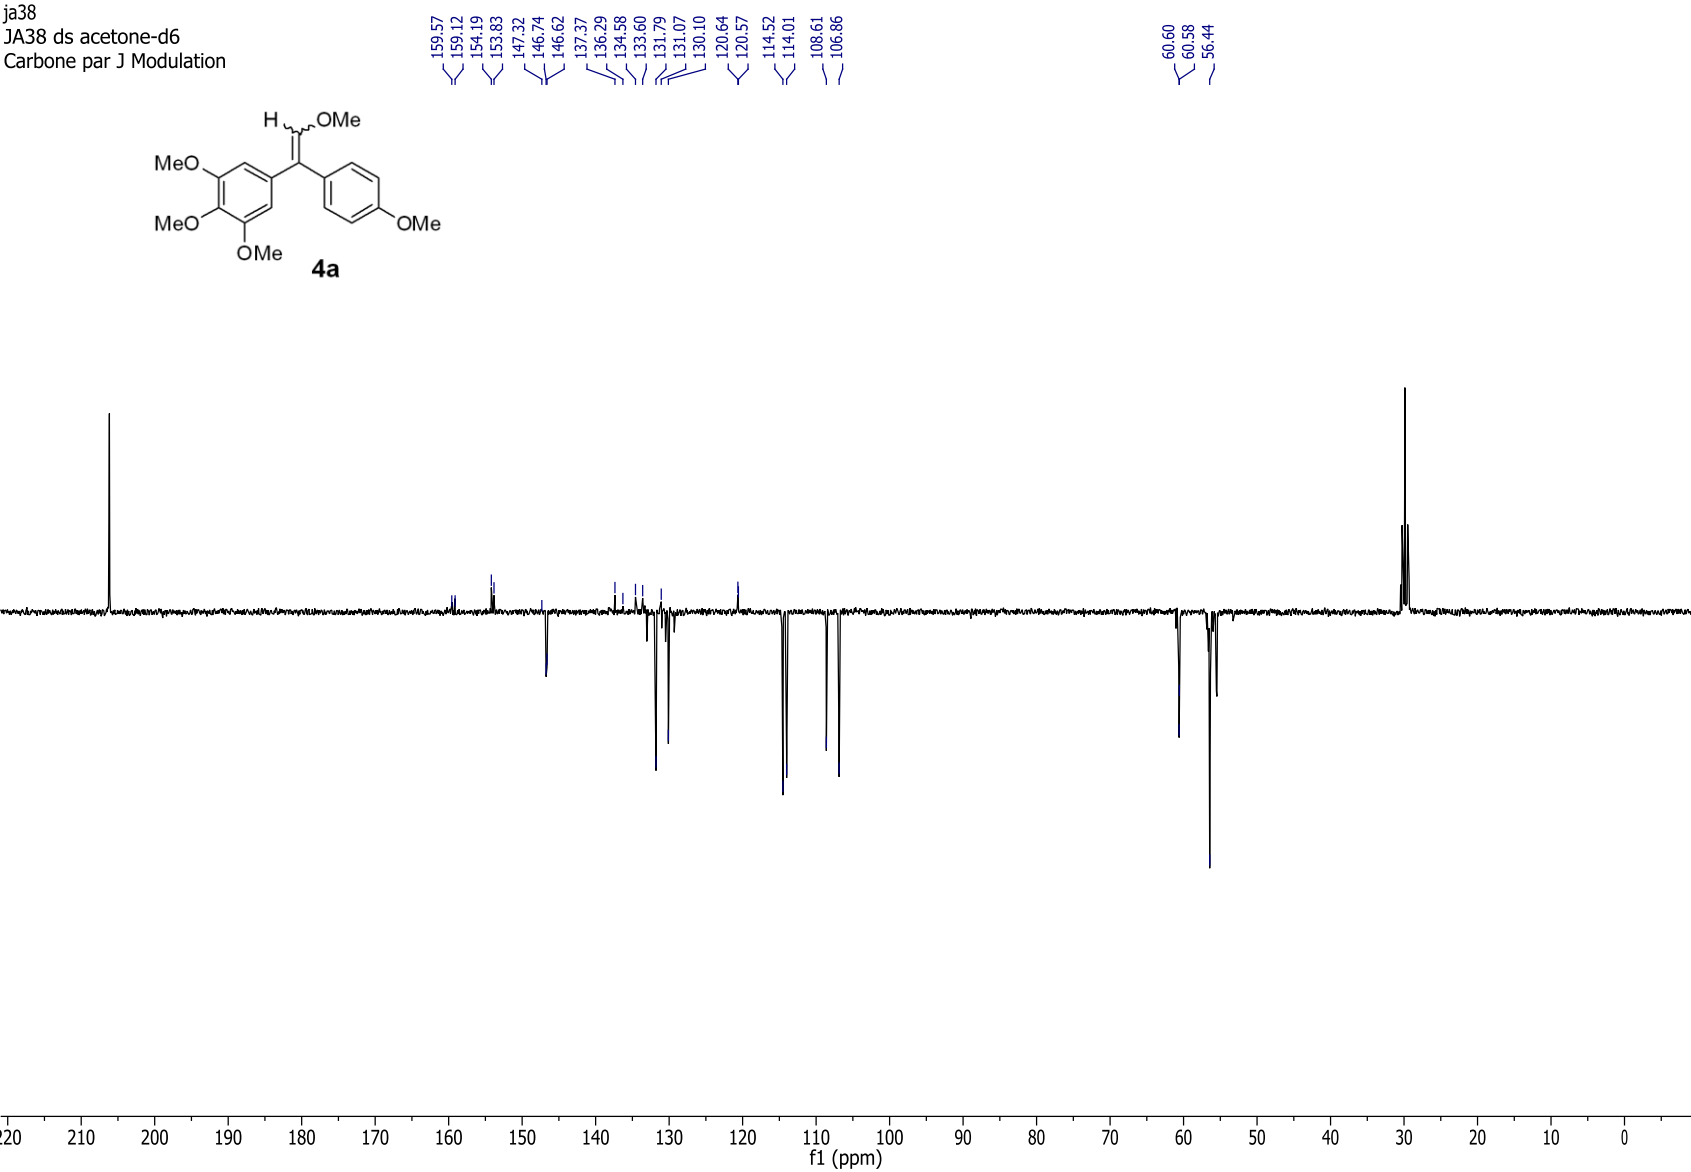

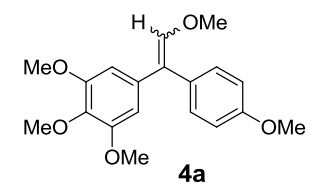

**JA38 ds acetone-d6  
NOESY Correlations spatiales H...H**

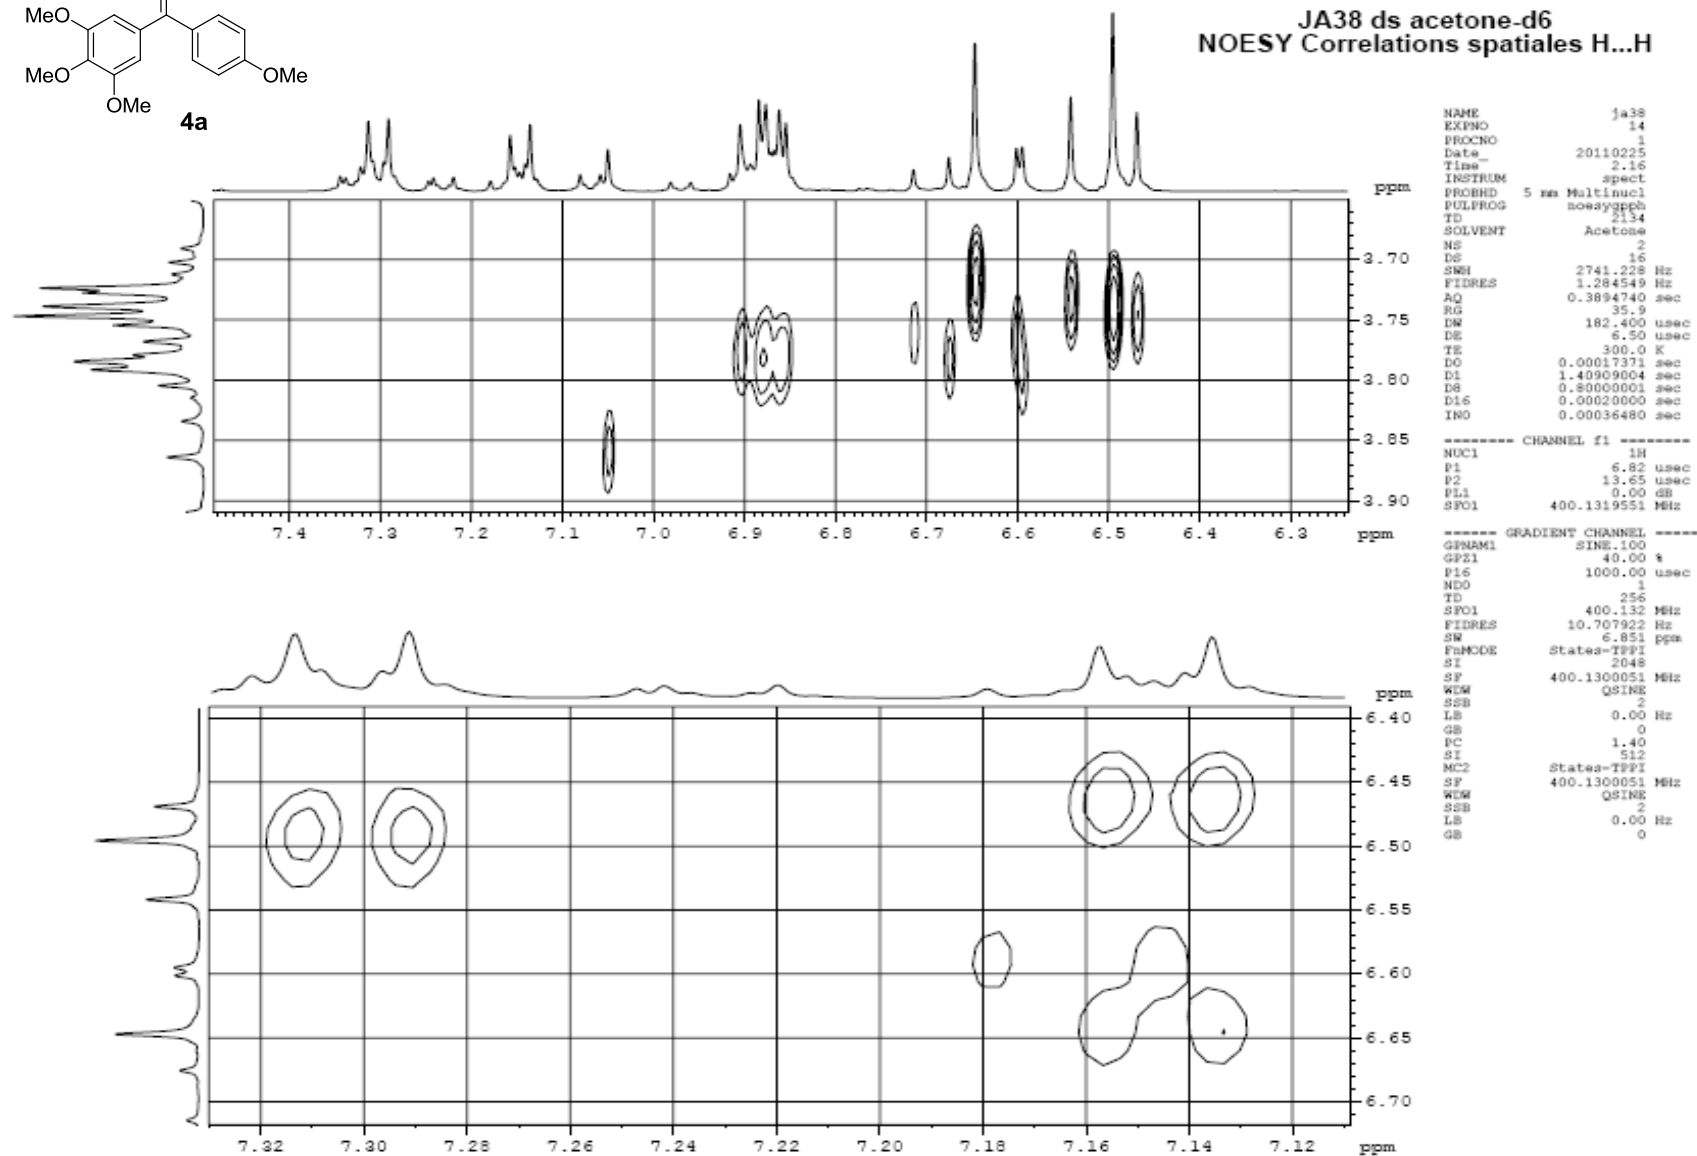

ja17.24  
JA17 24-37 ds CDCl3  
PROTON

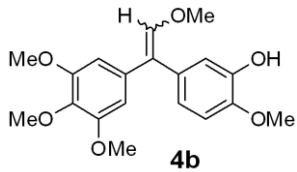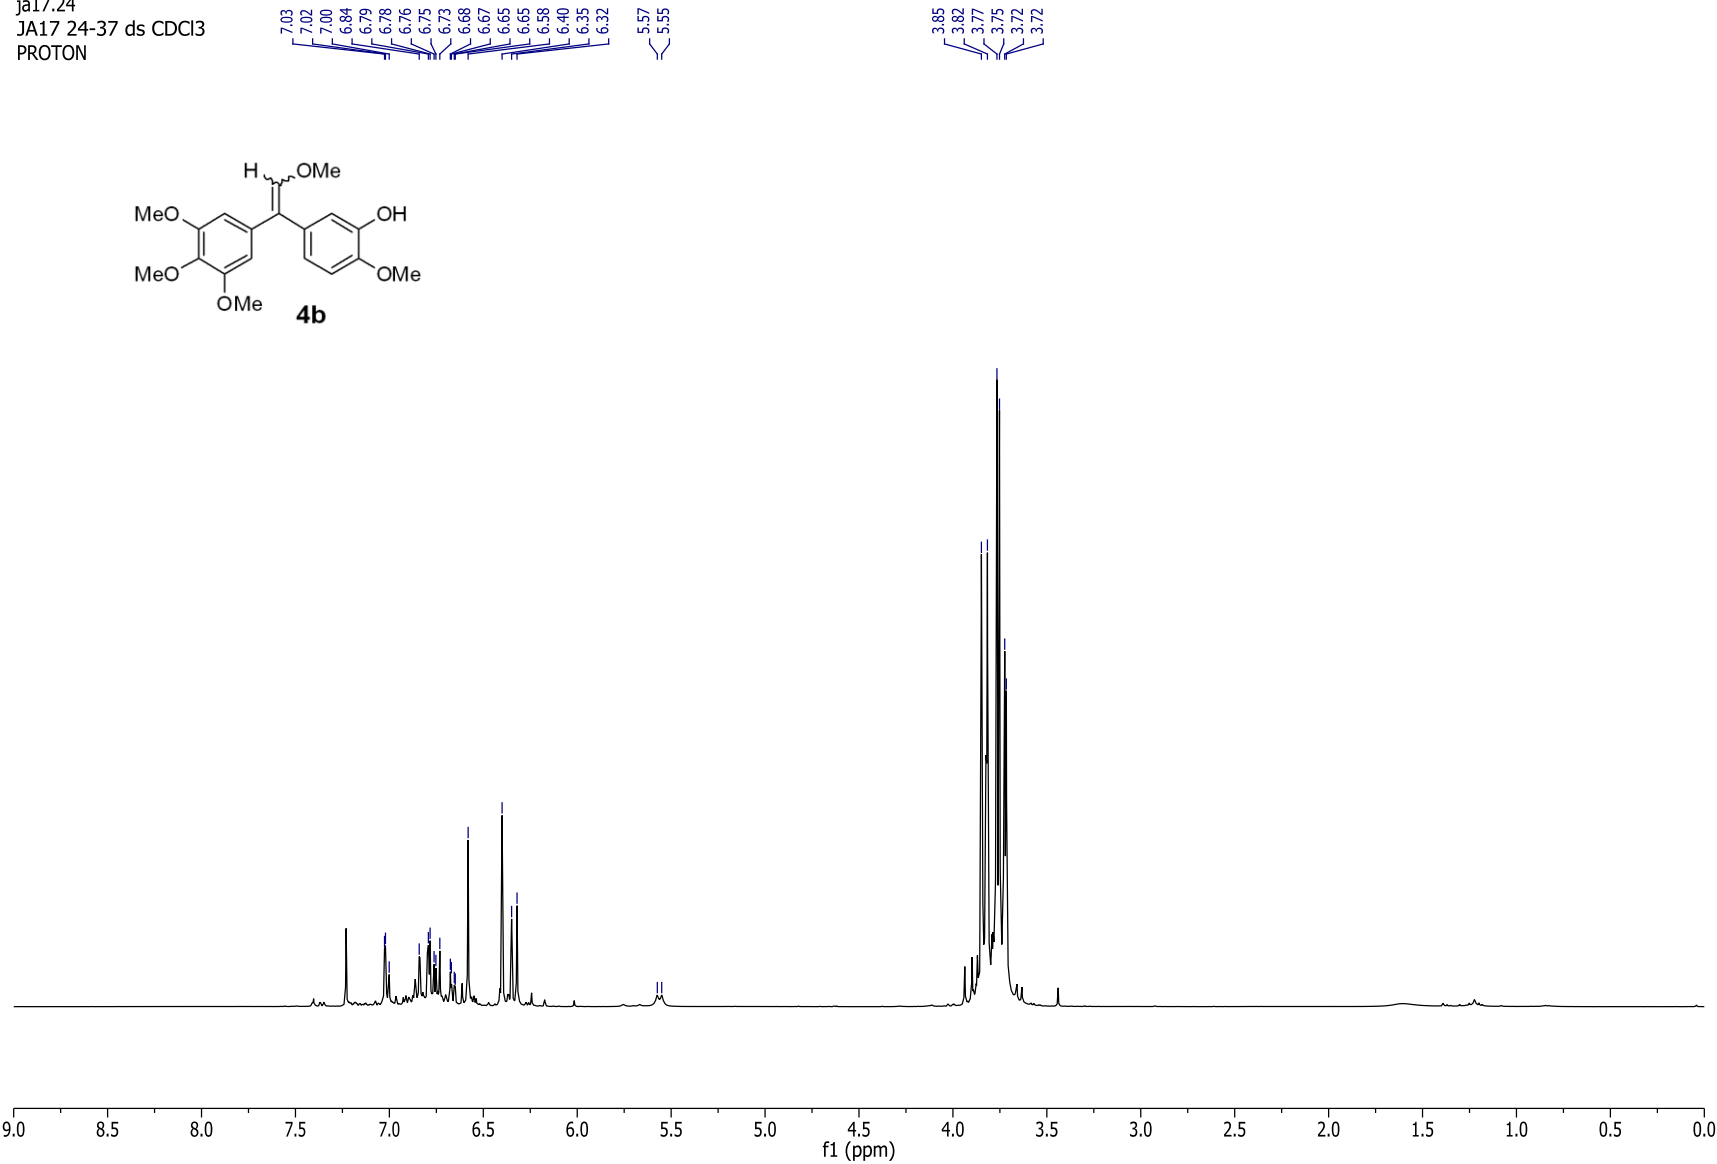

ja17.24  
JA17 24-37 ds CDCl3  
Carbone par J Modulation

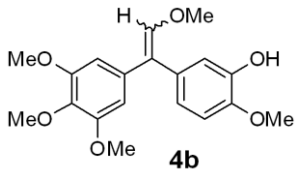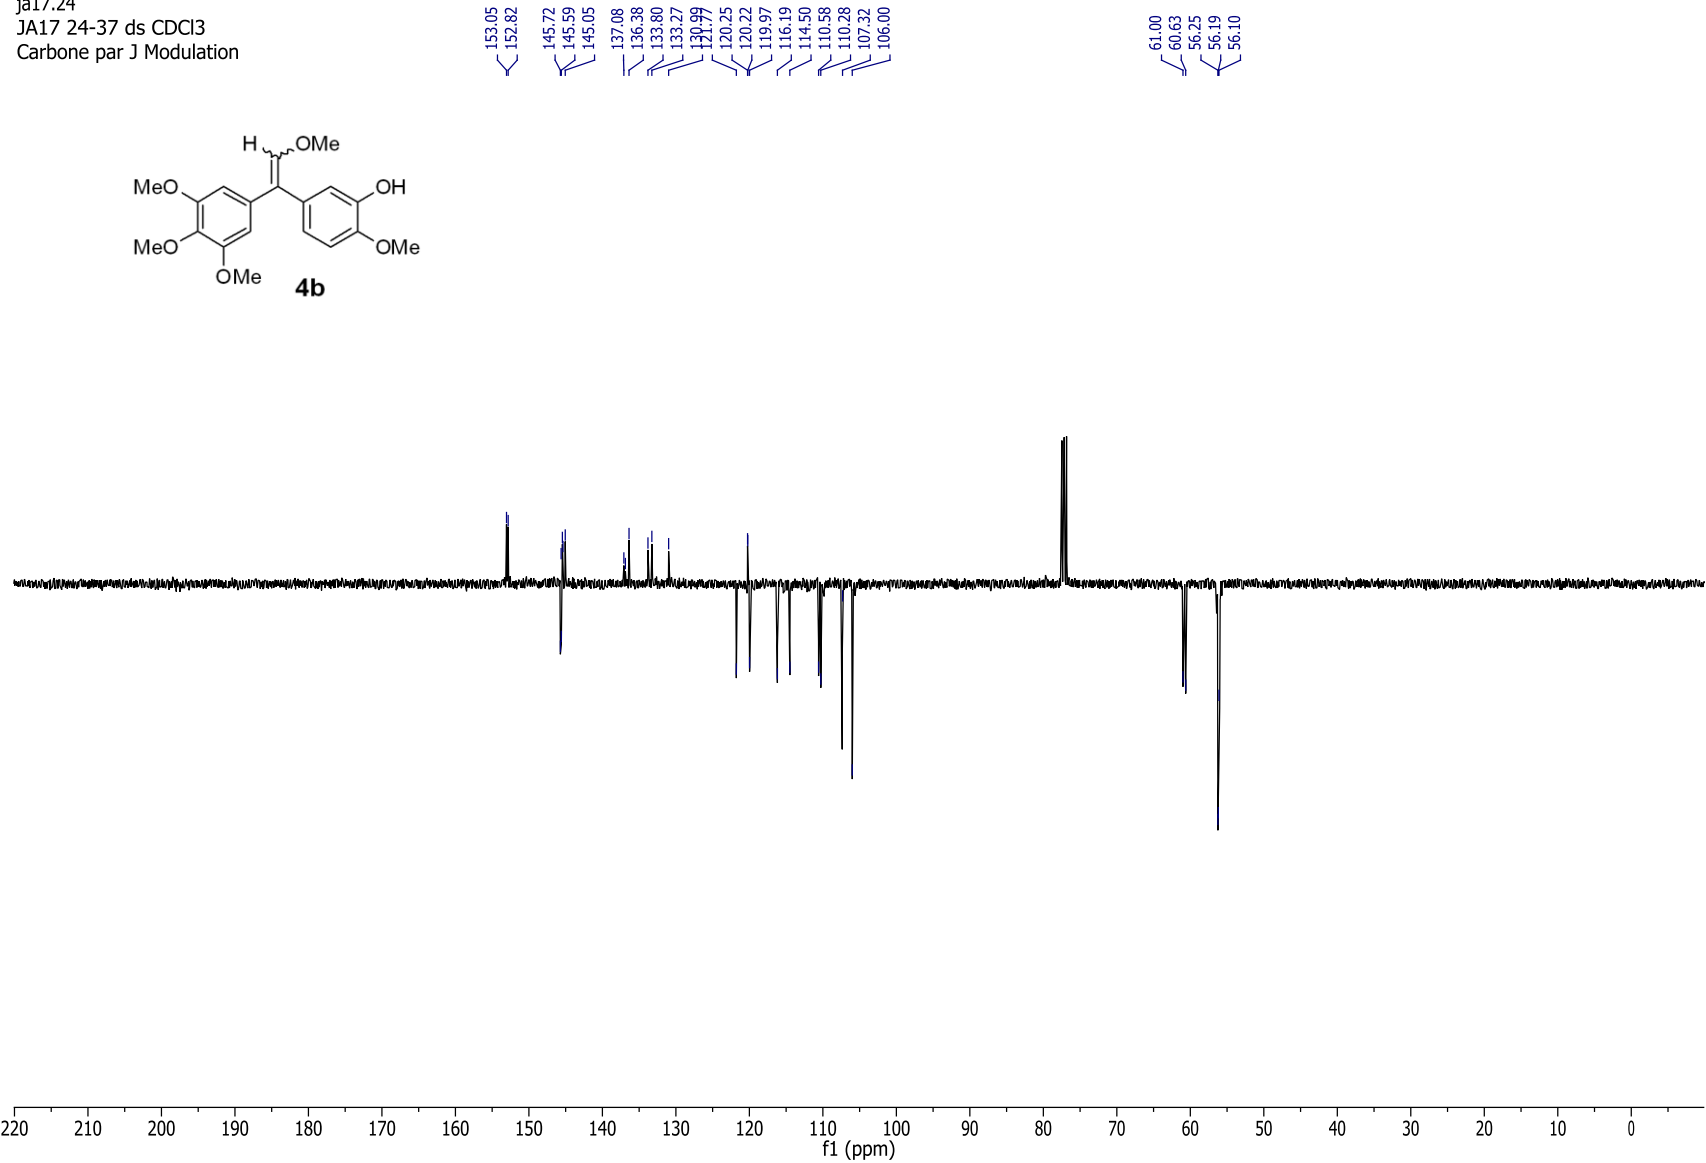



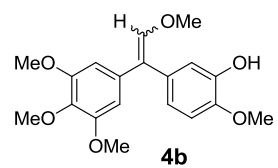

JA17 24-37 ds CDCl<sub>3</sub>  
NOESY Correlations spatiales H...H

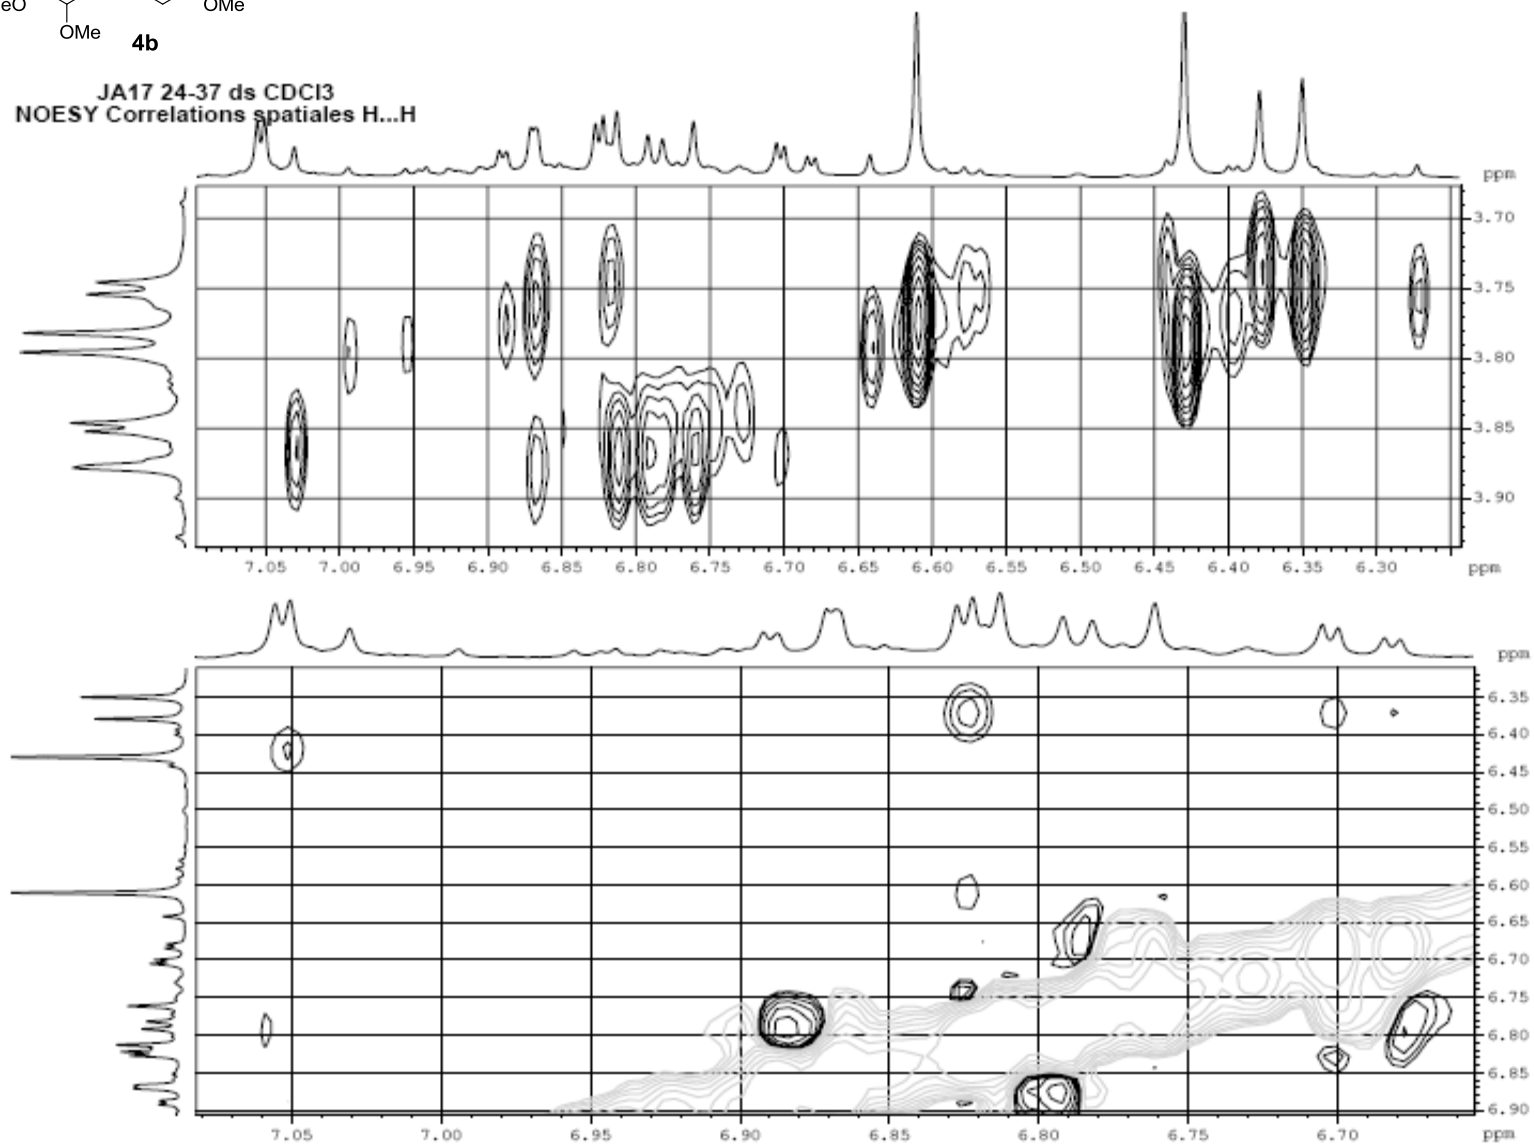

2011-02-03  
JA19 15-21 P  
PROTON CDCl3 d:\d31 23

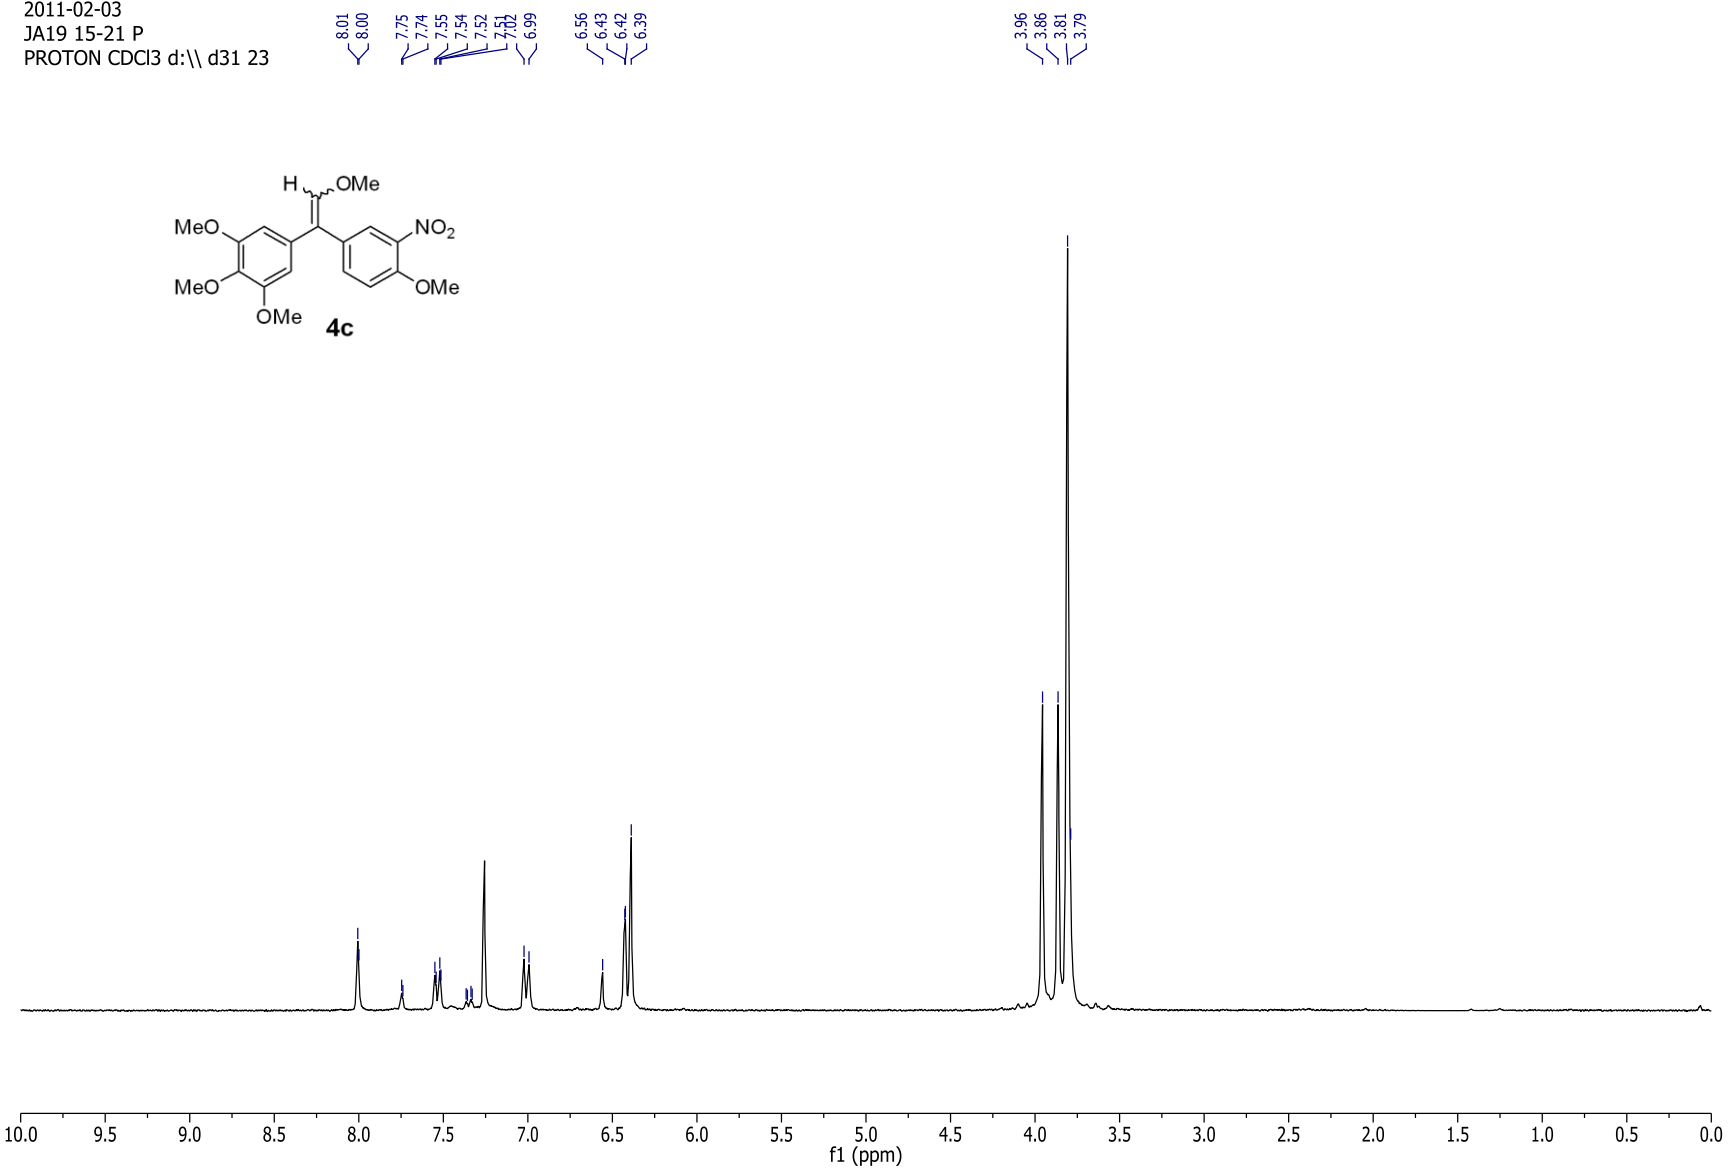

ja19  
Carbone par J Modulation

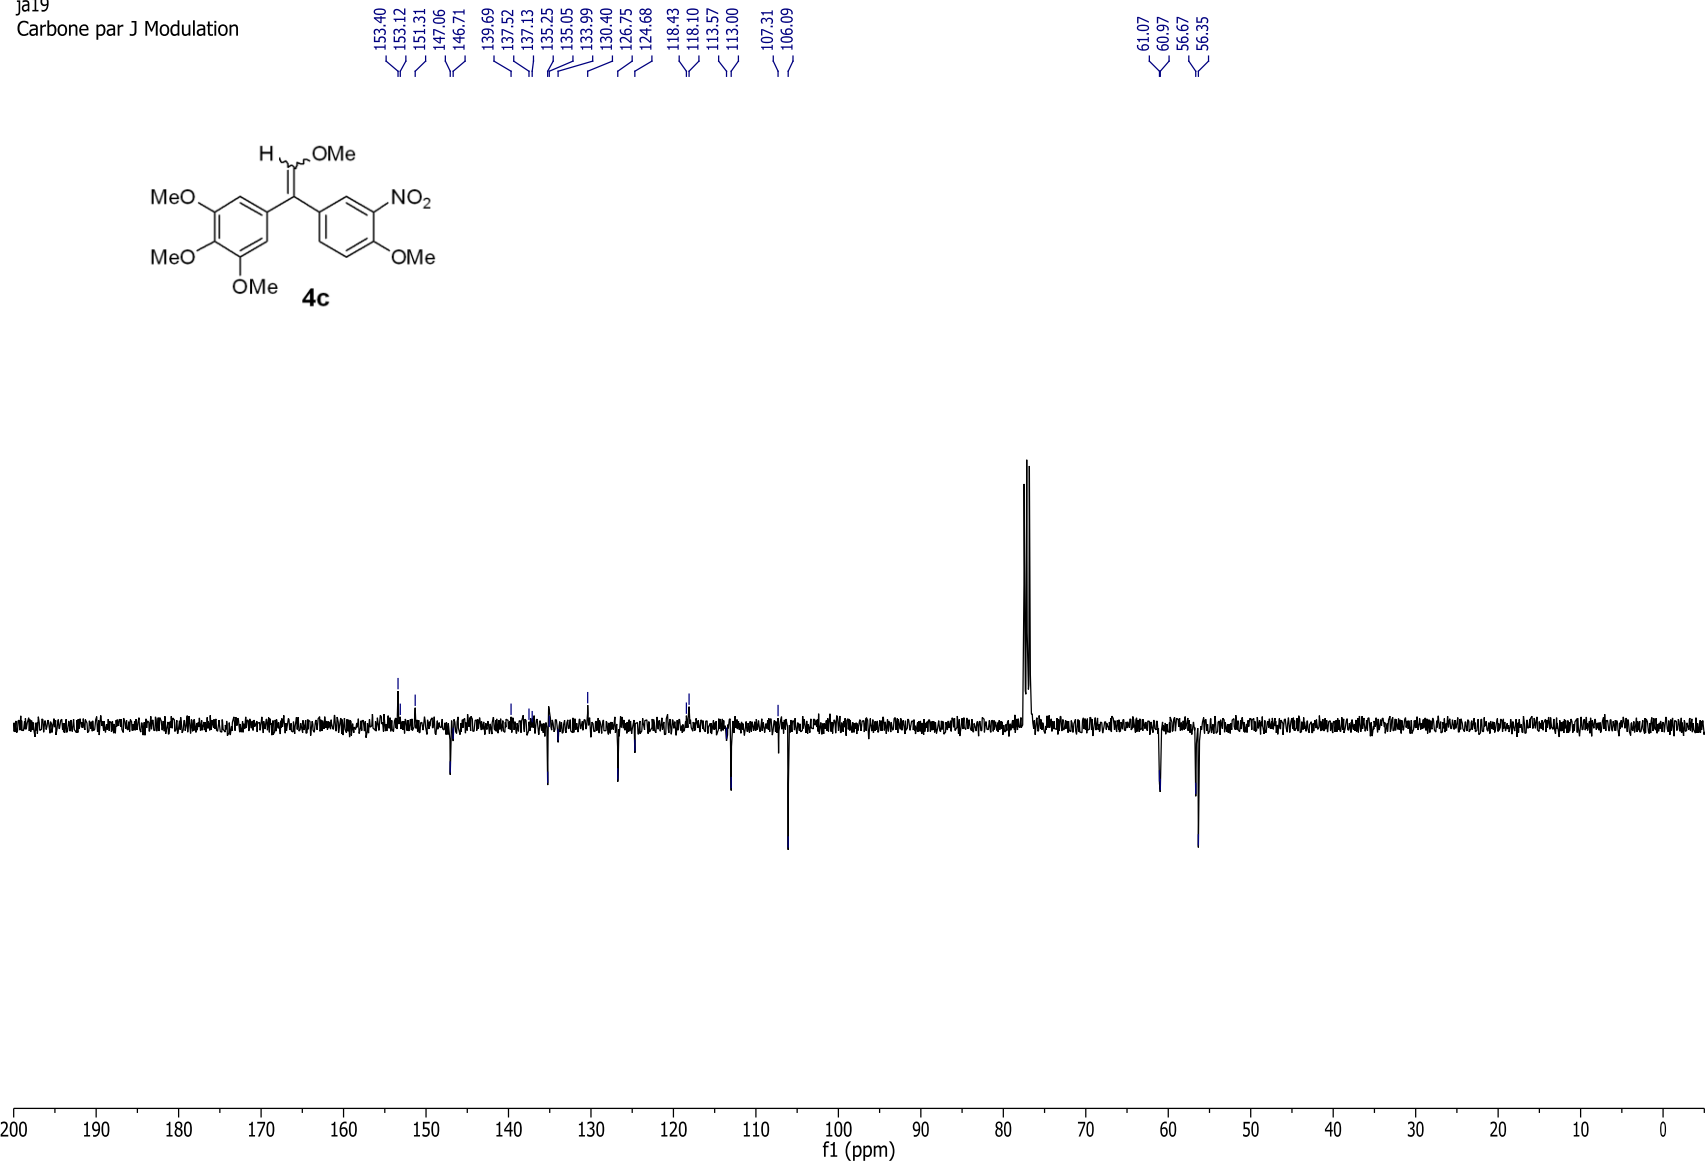

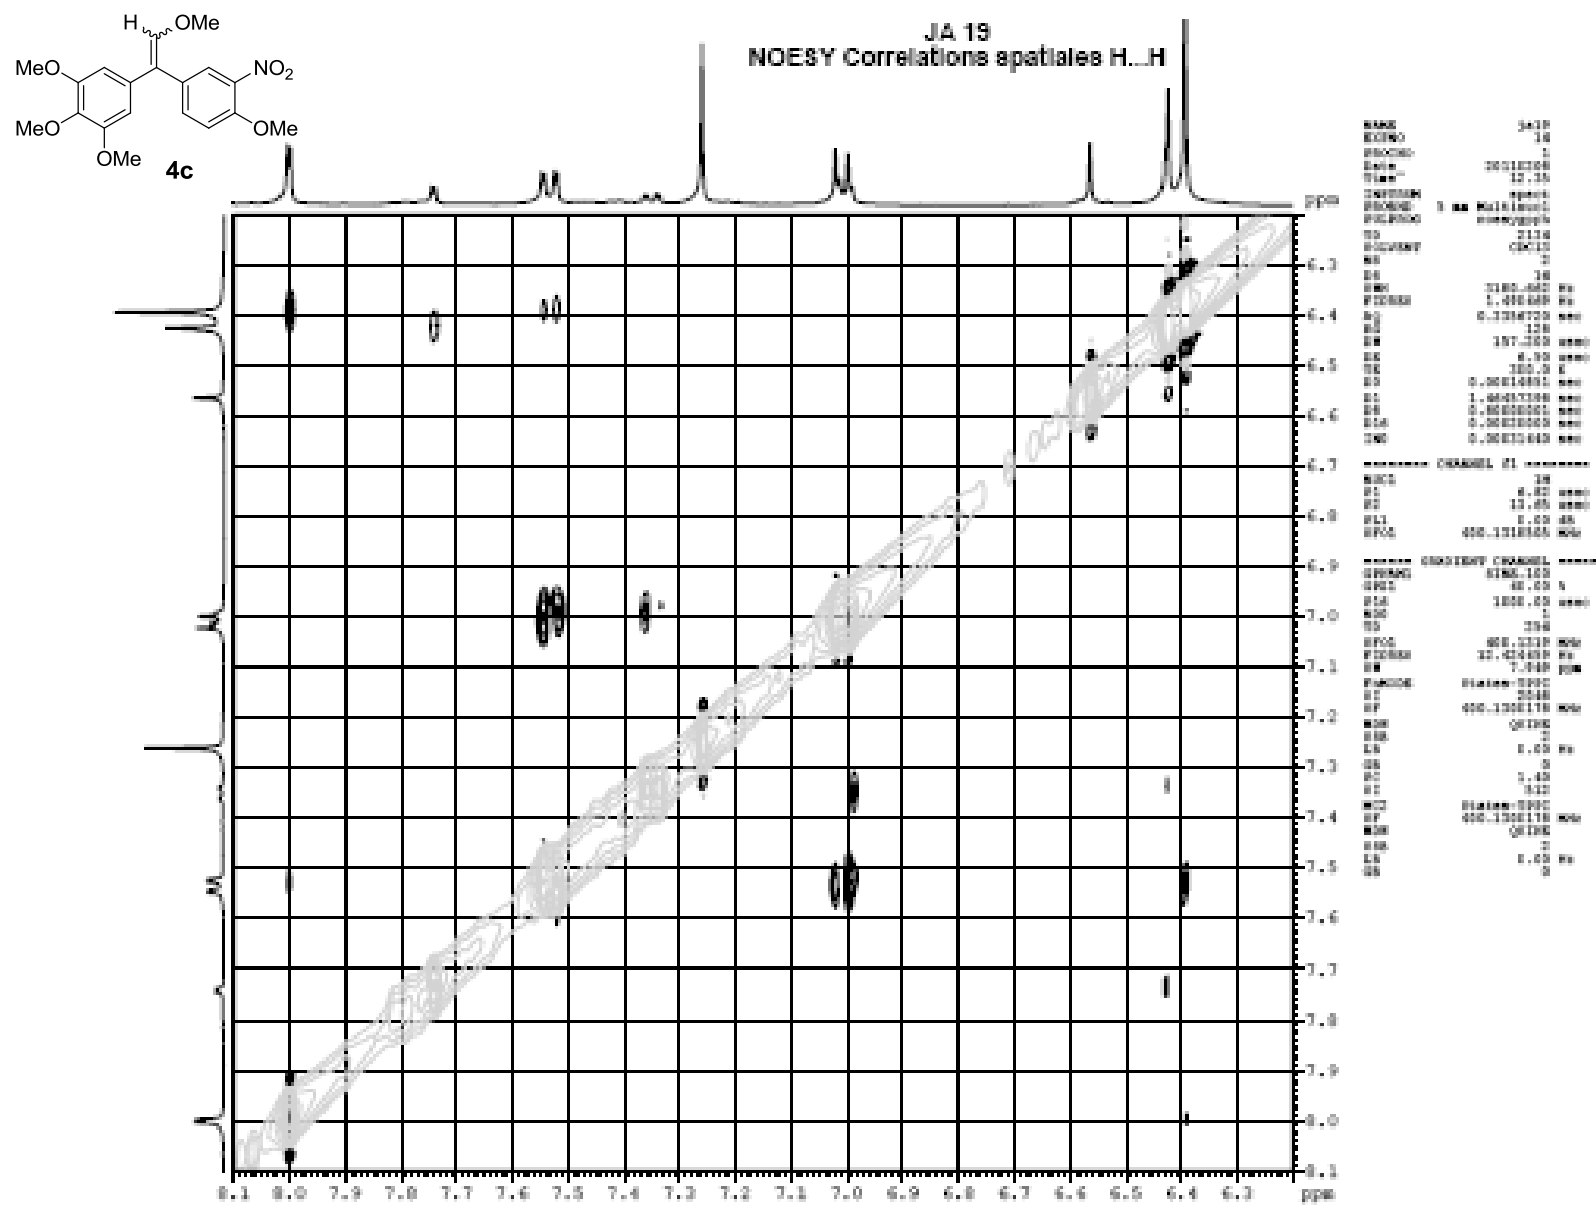

2011-02-04  
JA20 9-13 P  
PROTON CDCl3 d:\ d31 10

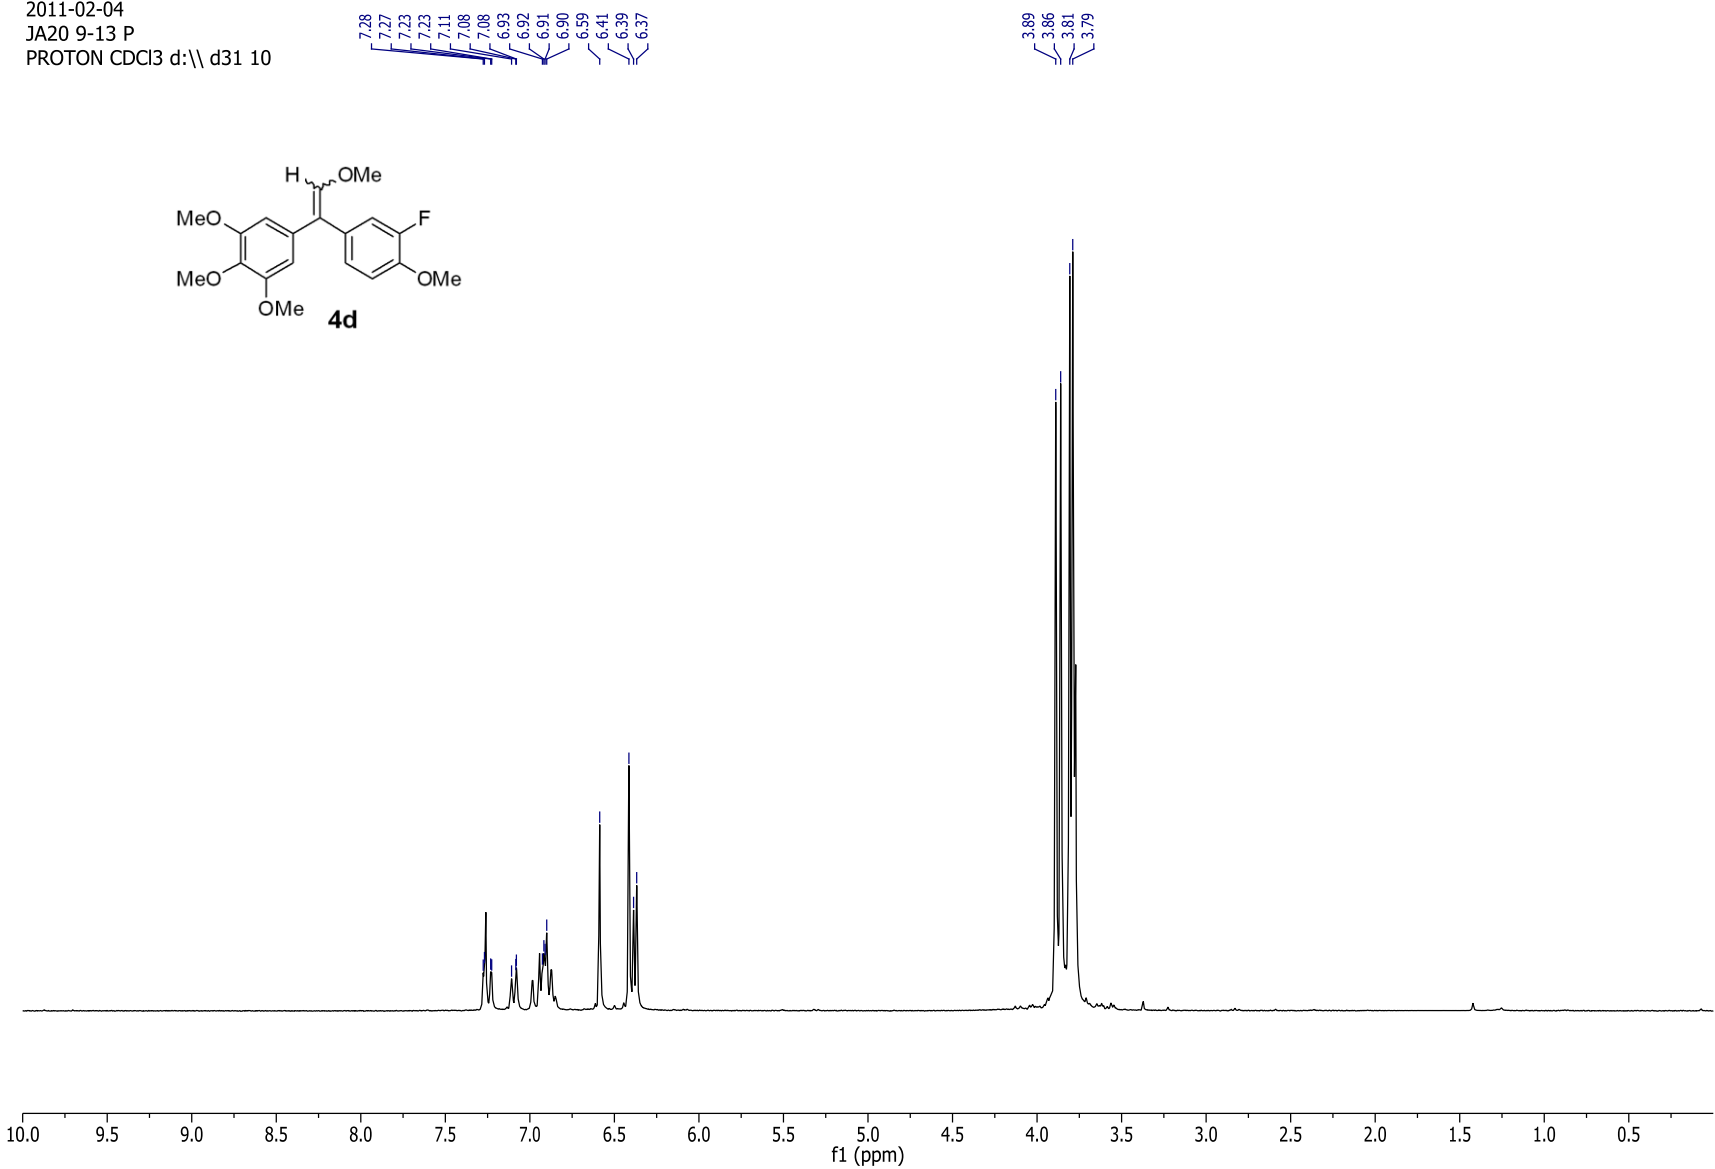

ja20.9  
JA20 9-13P ds CDCl3  
Carbone par J Modulation

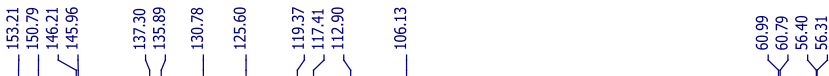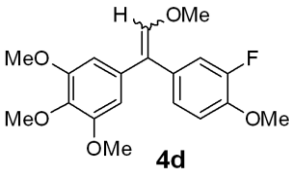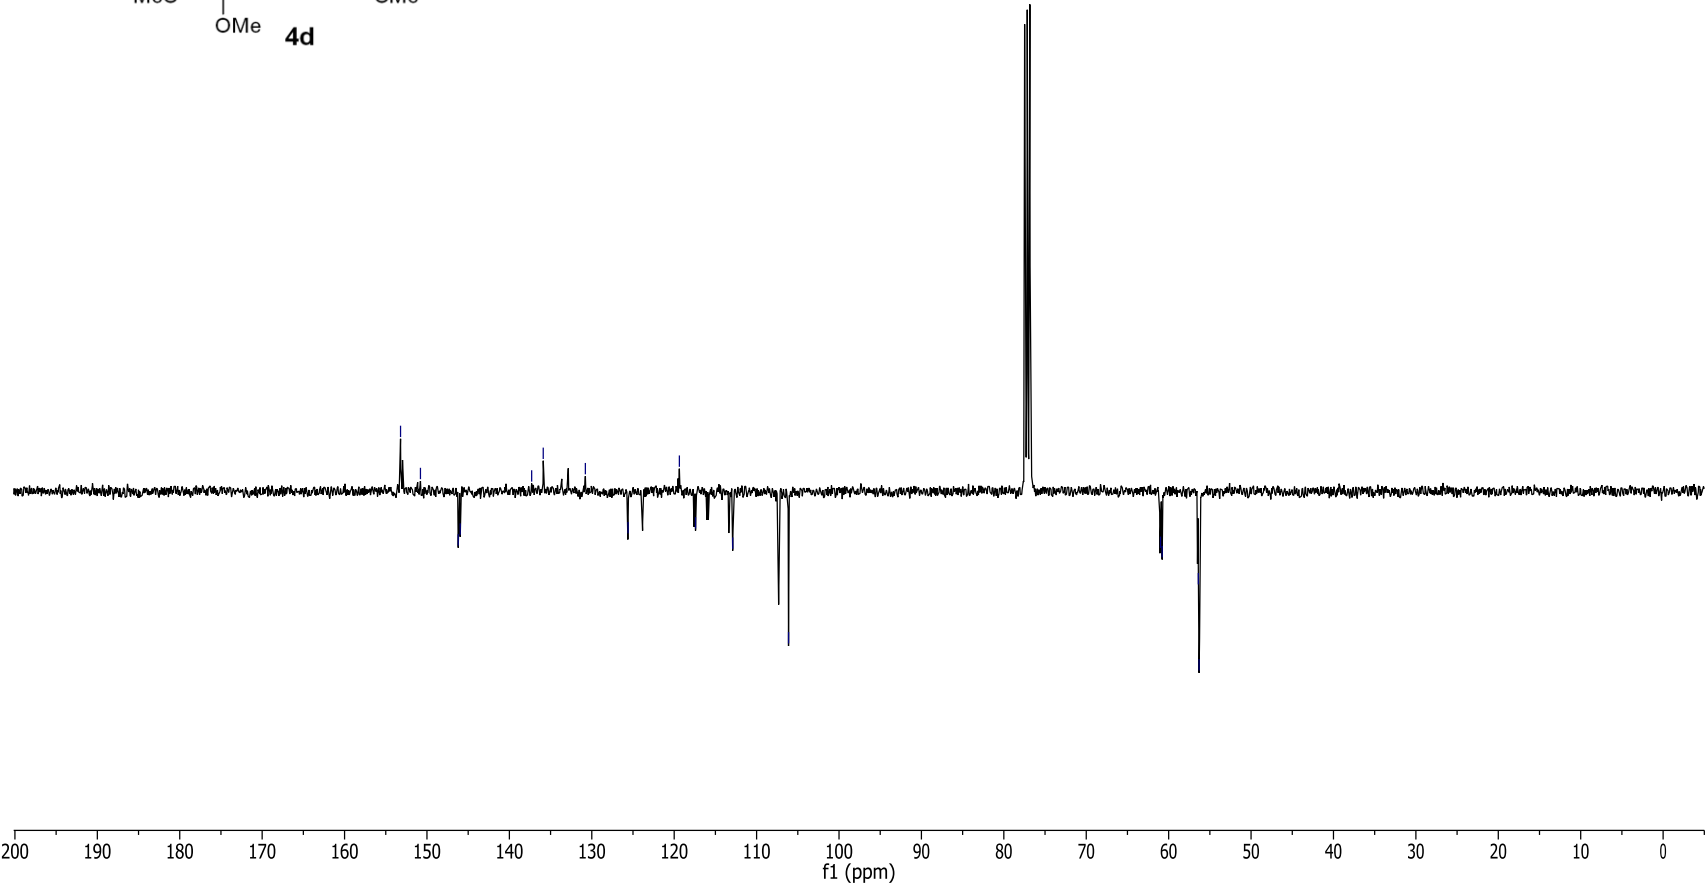

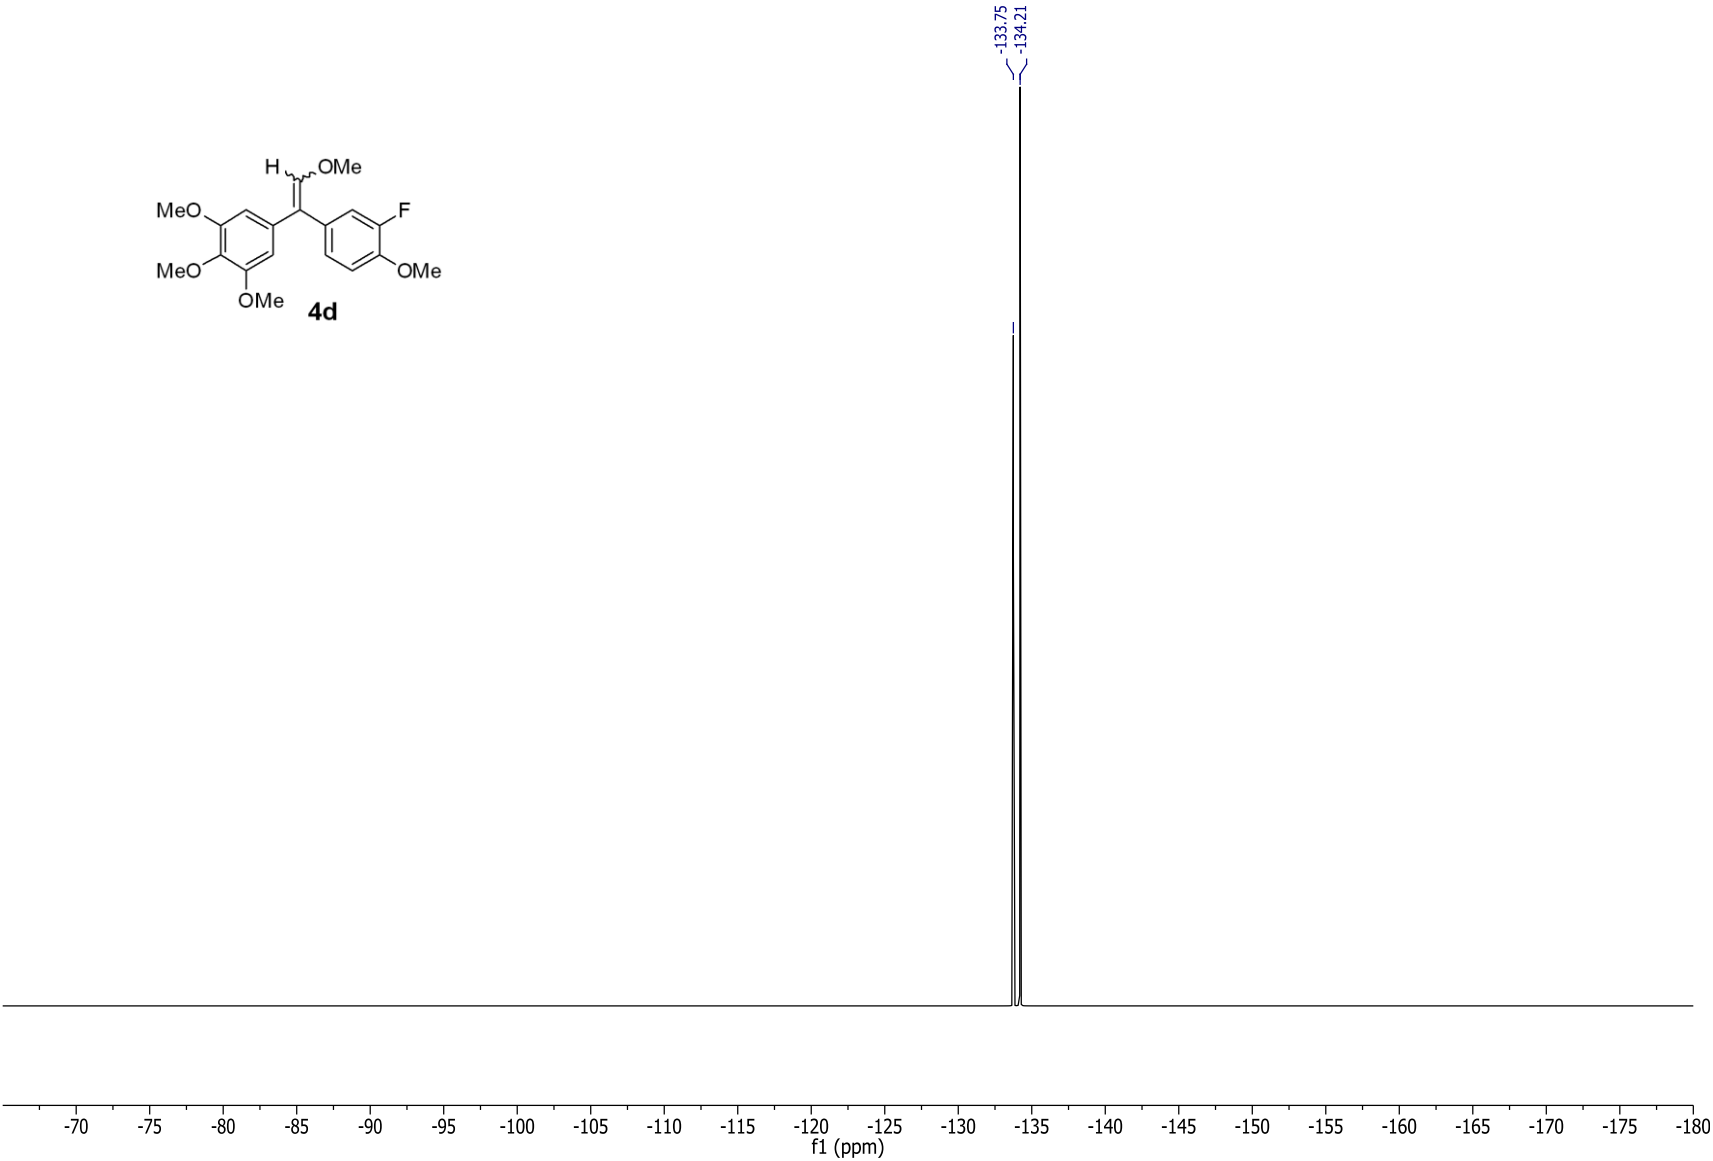

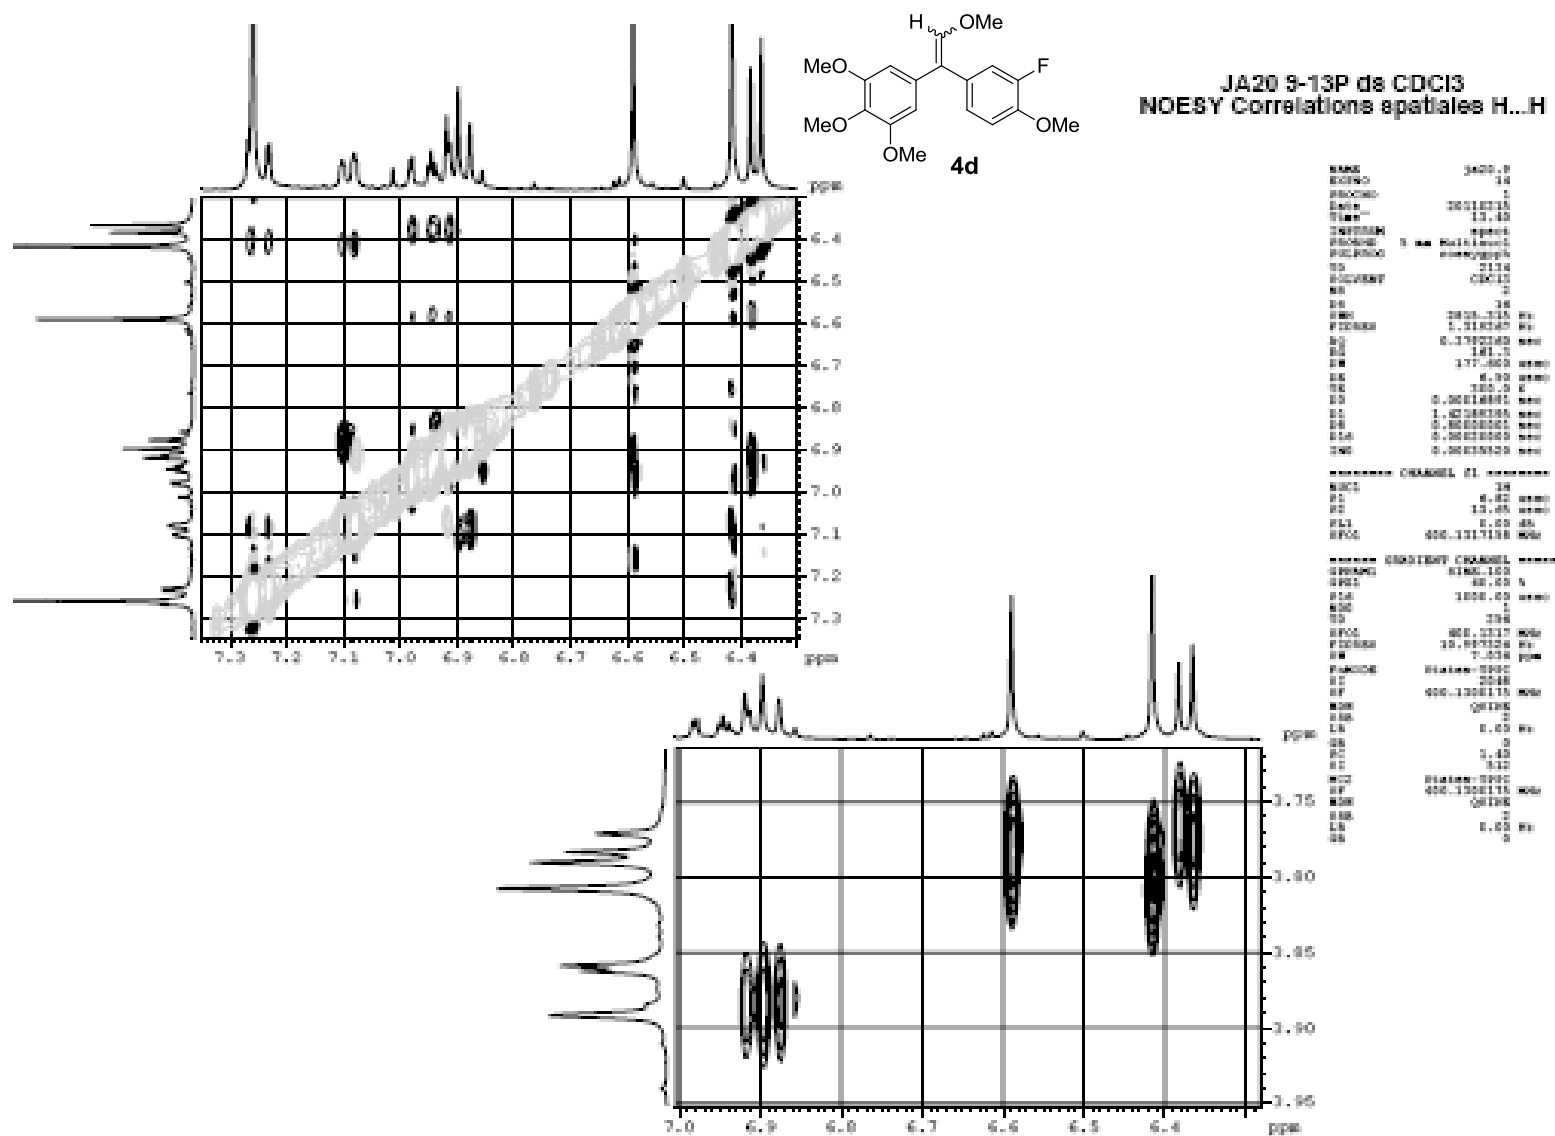



2012-02-21  
JA128  
Proton.4 Acetone D:\\ chit 23

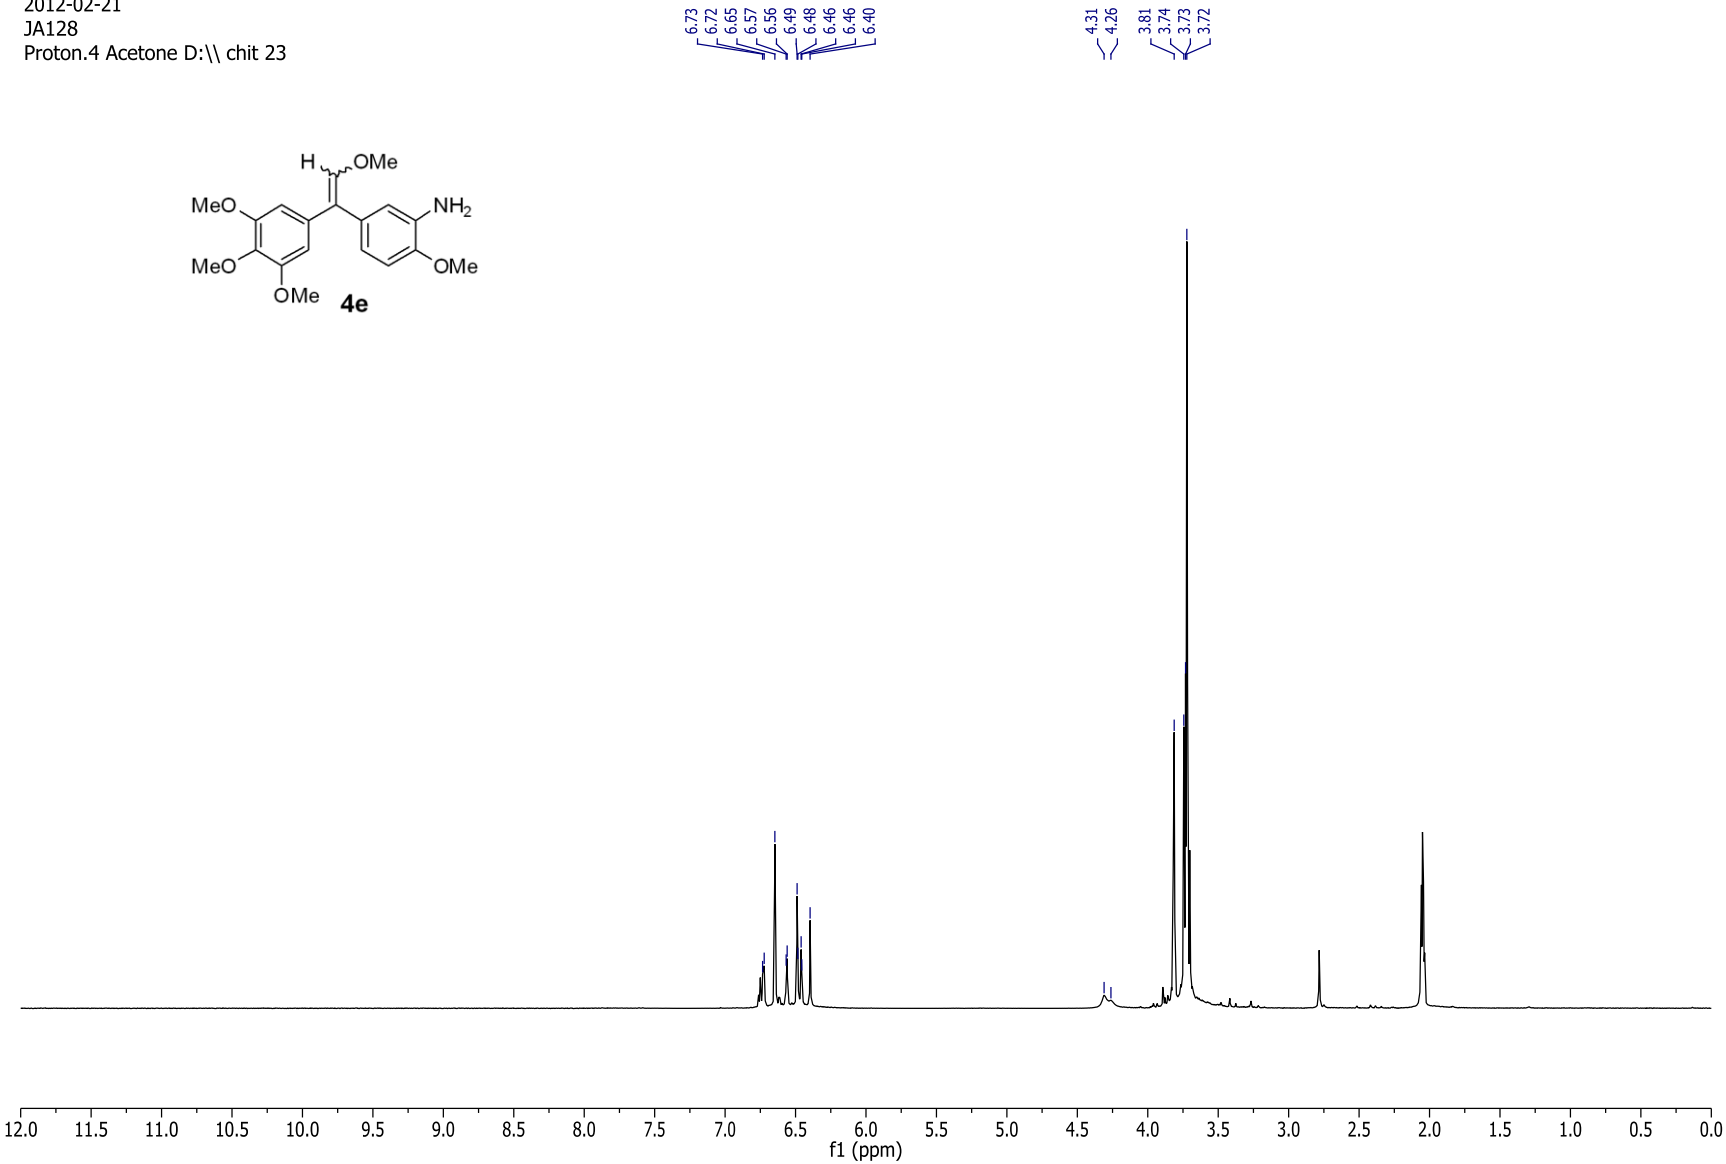

ja128  
JA128 ds acetone-d6  
Carbone par J Modulation

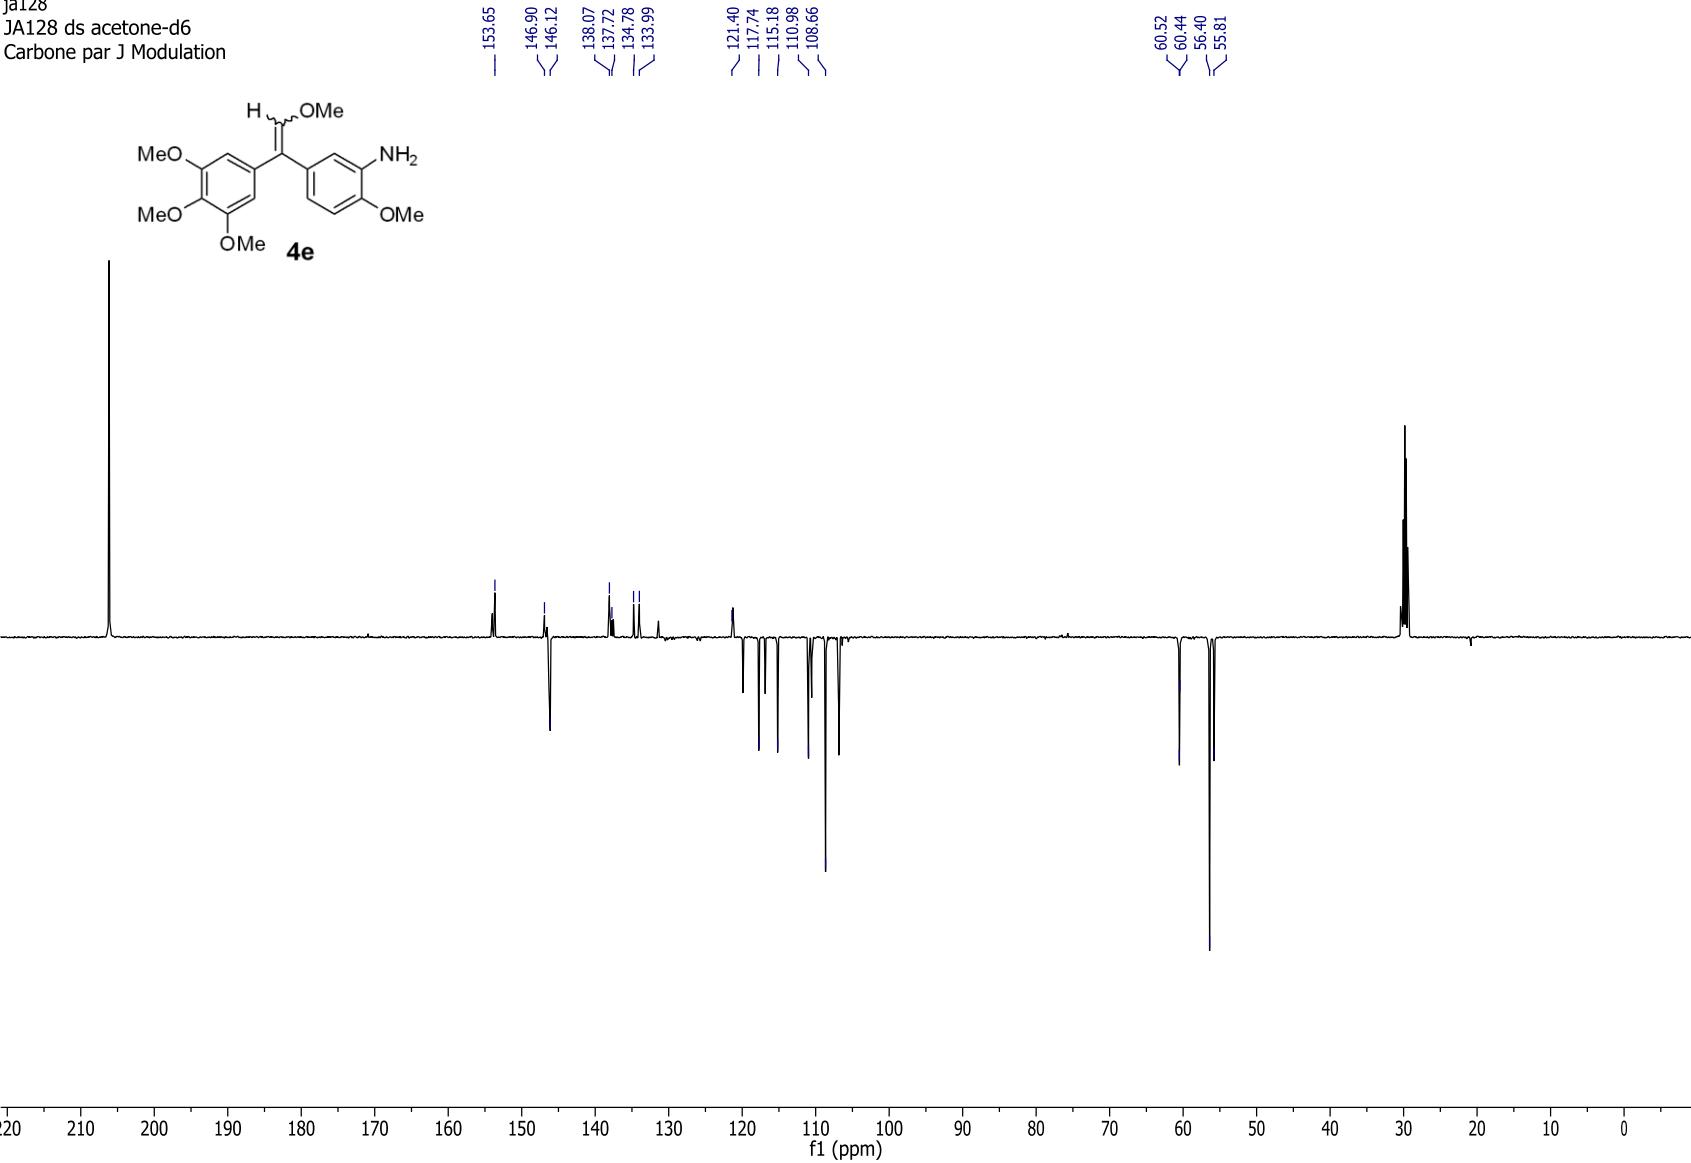

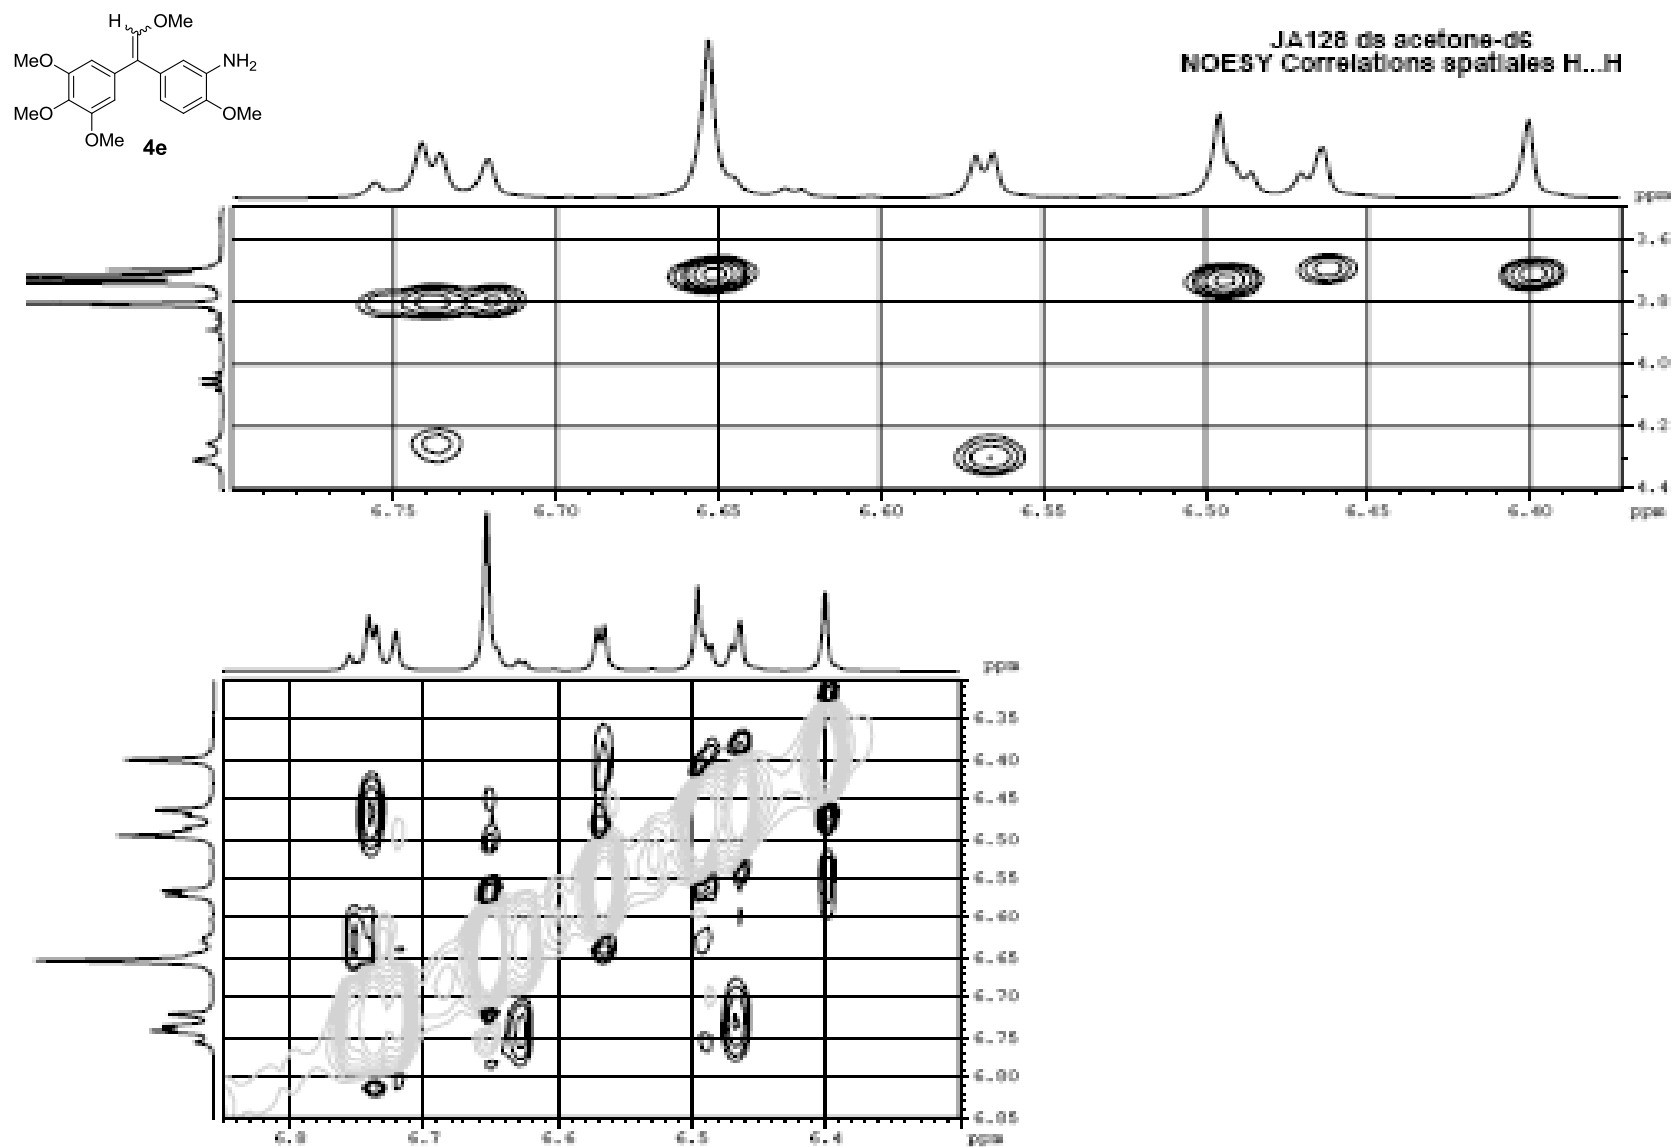

2012-03-29  
JA128F2 2eme Purif  
Proton.4 Acetone D:\\ chit 42

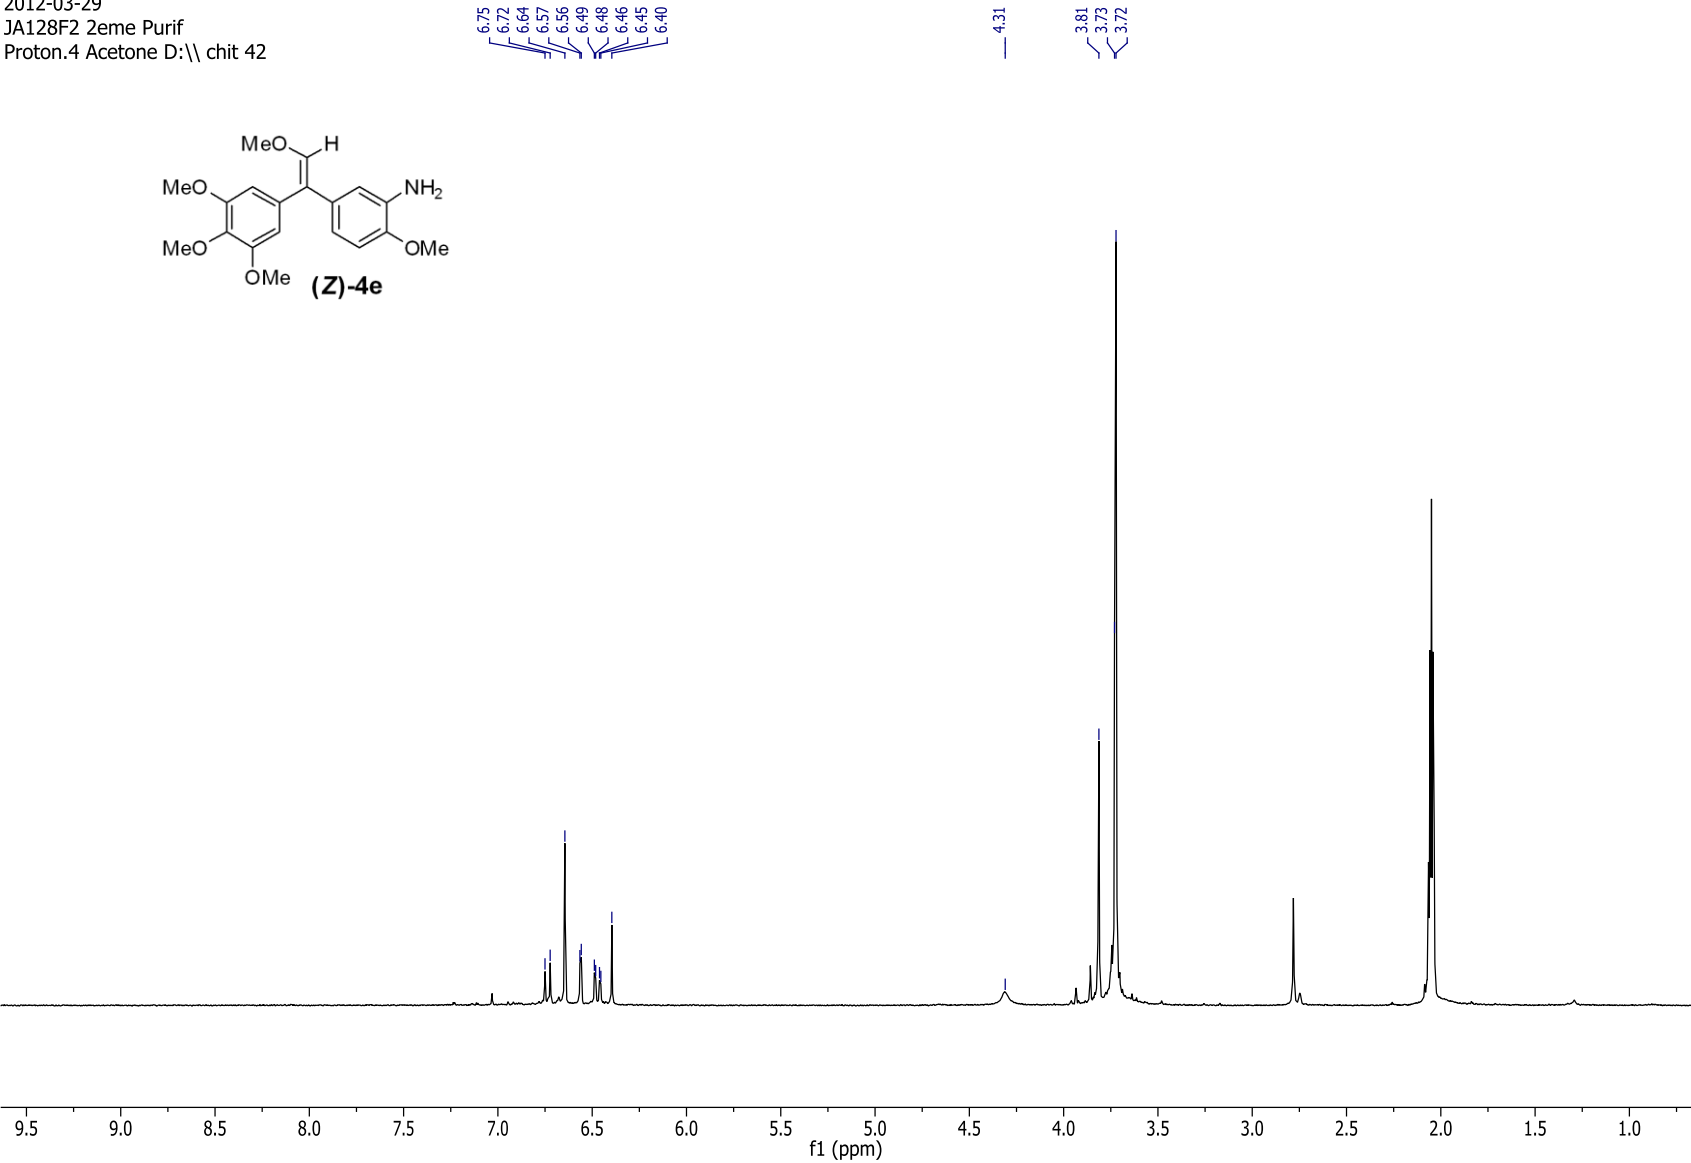

ja128f2p  
JA128F2 purifie  
Carbone par J Modulation

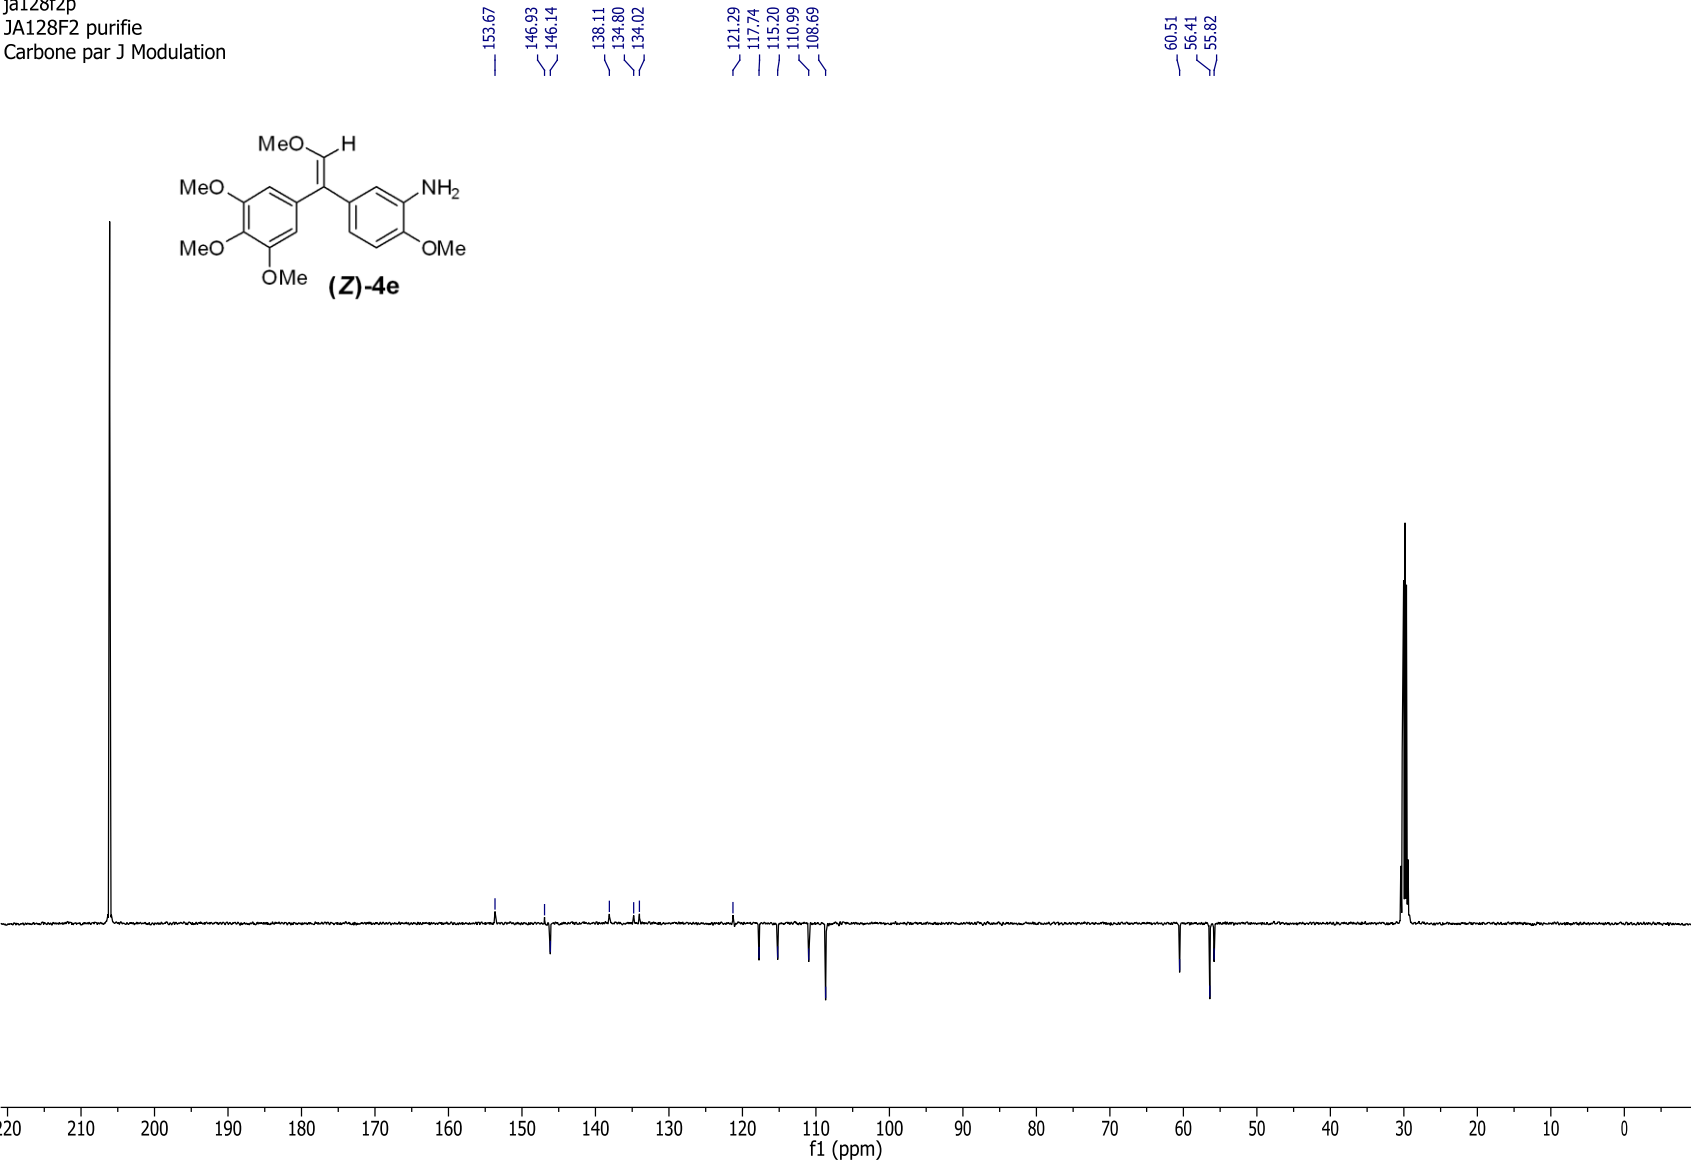

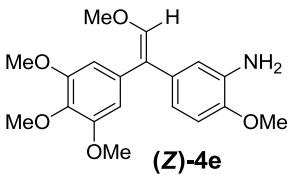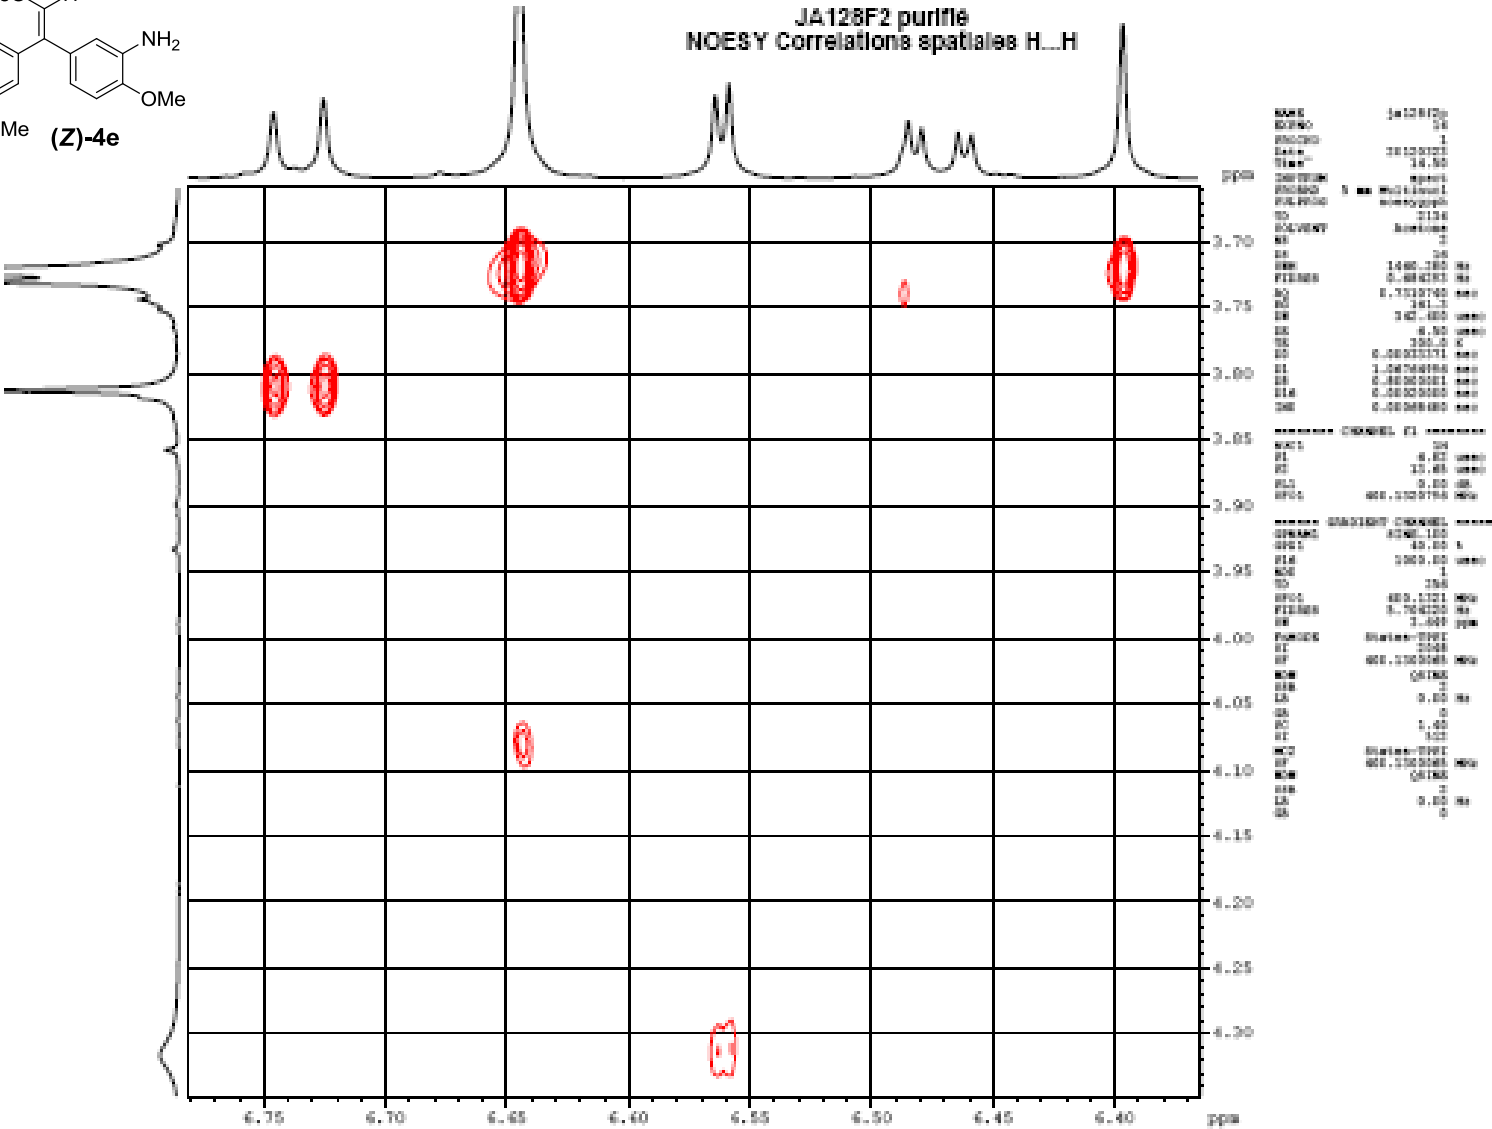

ja35  
JA35 ds acetone-d6  
PROTON

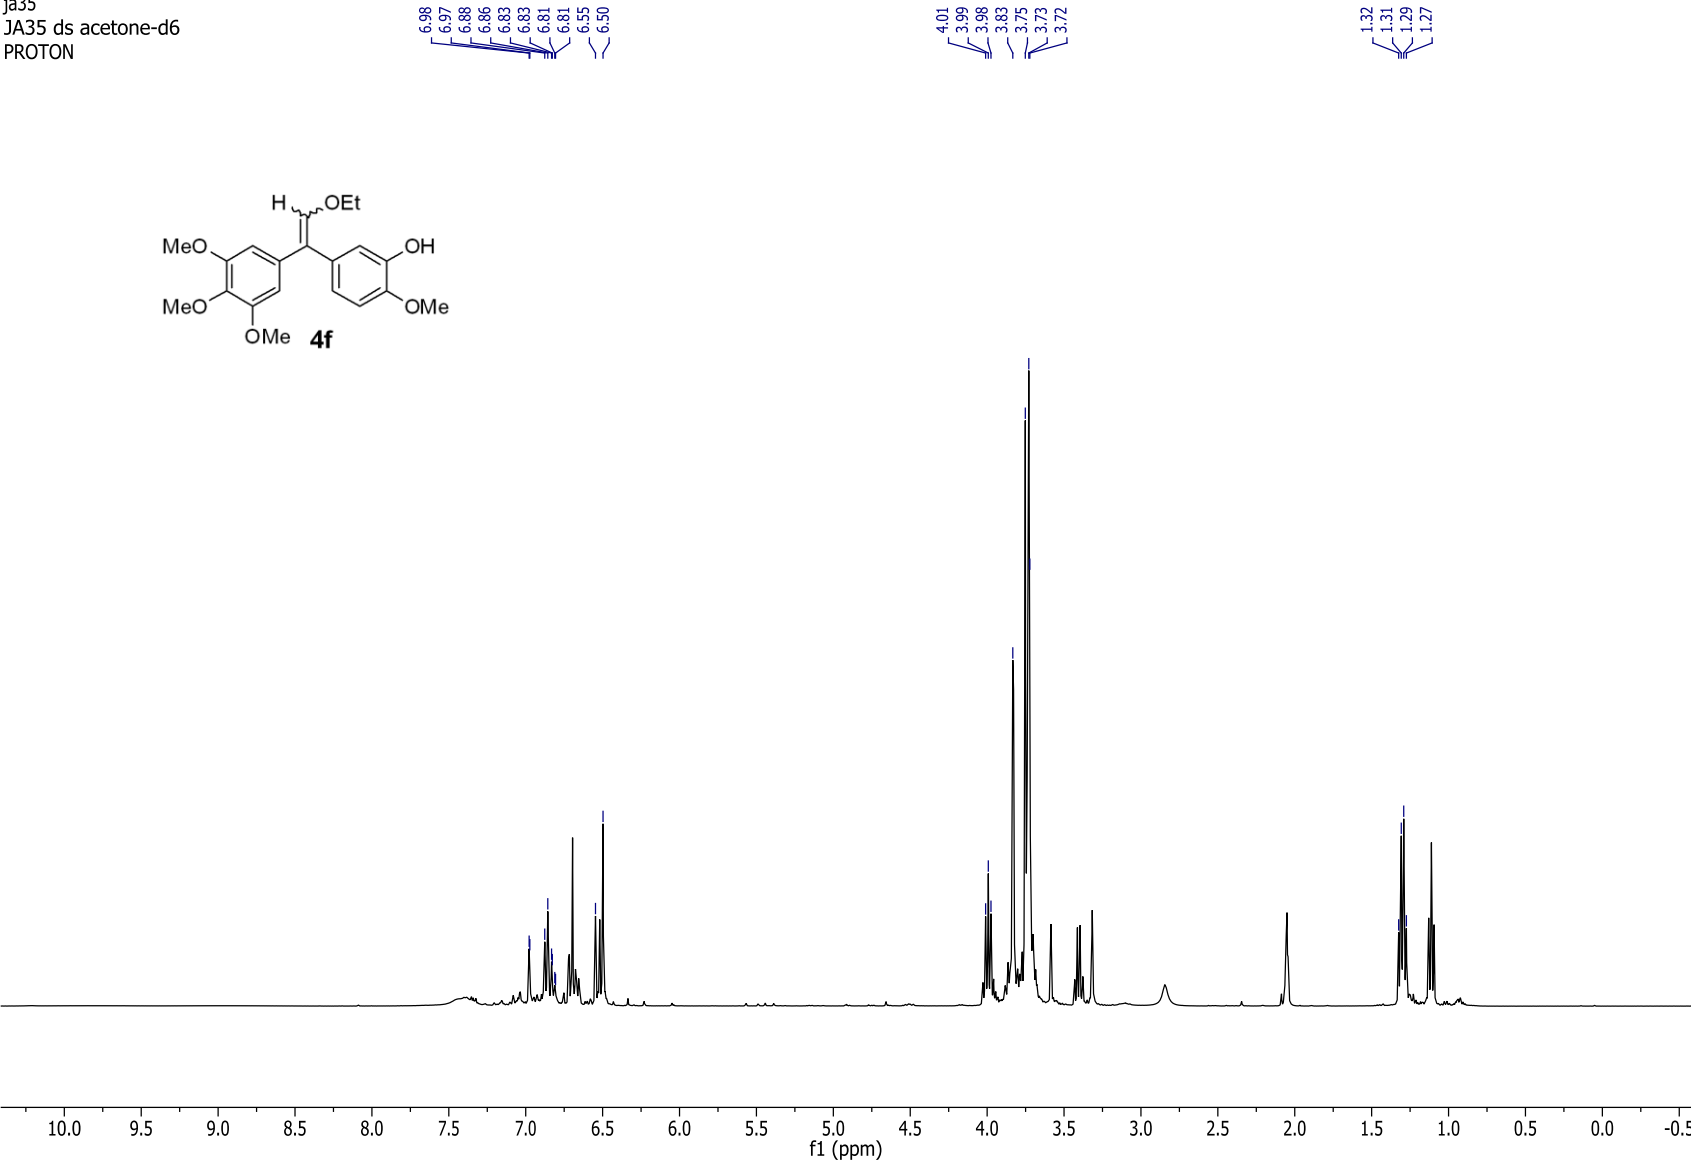

ja35  
JA35 ds acetone-d6  
Carbone par J Modulation

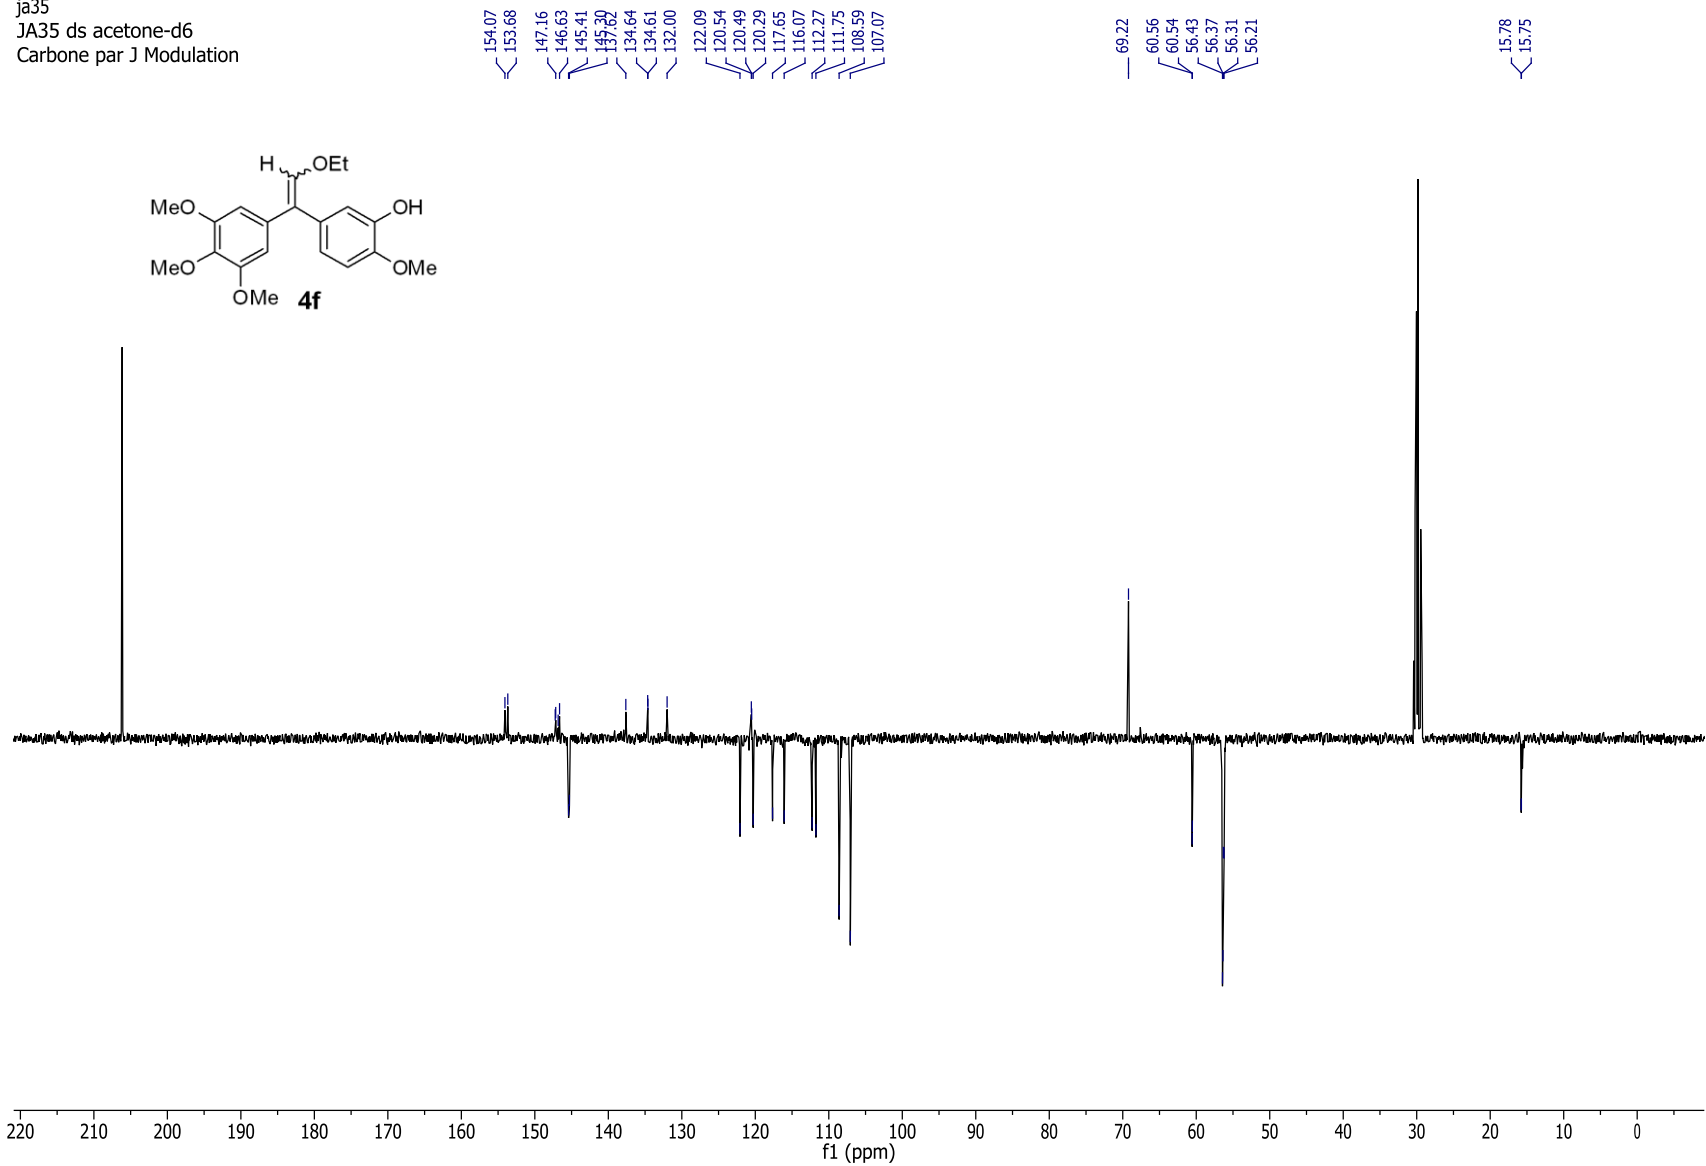



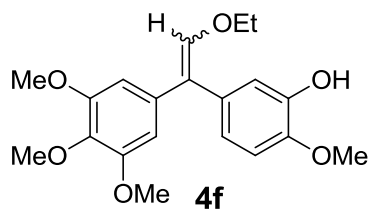

JA35 de acetone-d6  
NOESY Correlations spatiales H...H

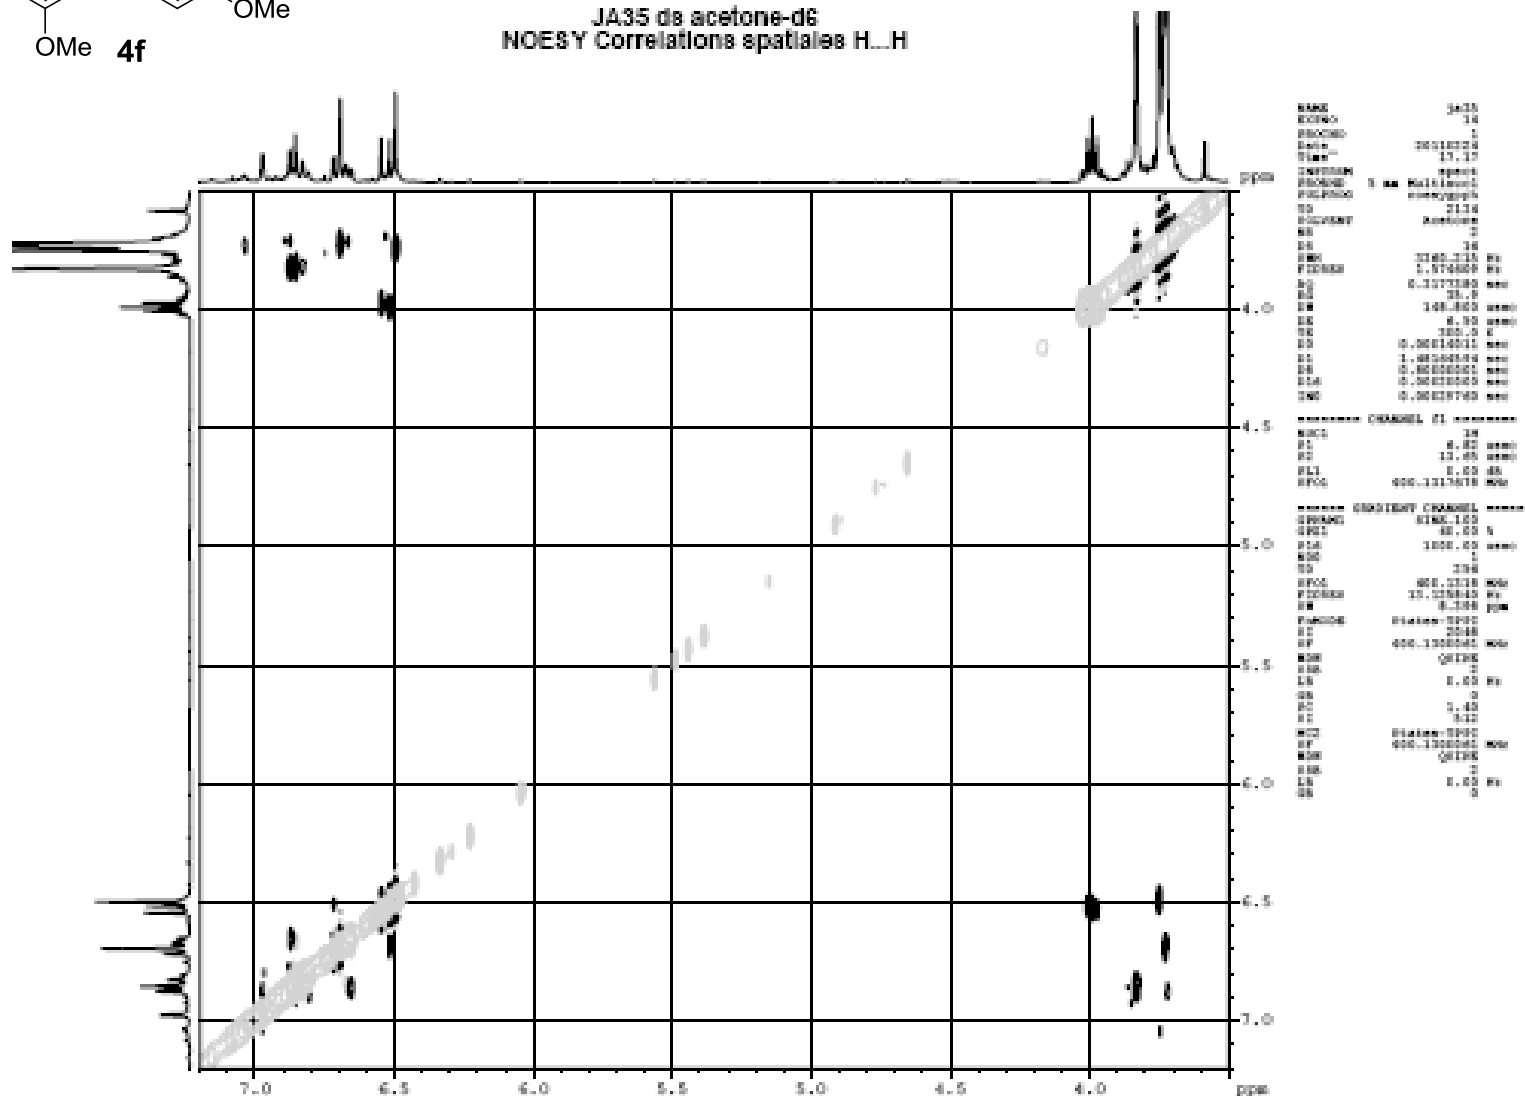

2011-02-17  
JA37 11-20 P  
PROTON CDCl3 d:\ d31 52

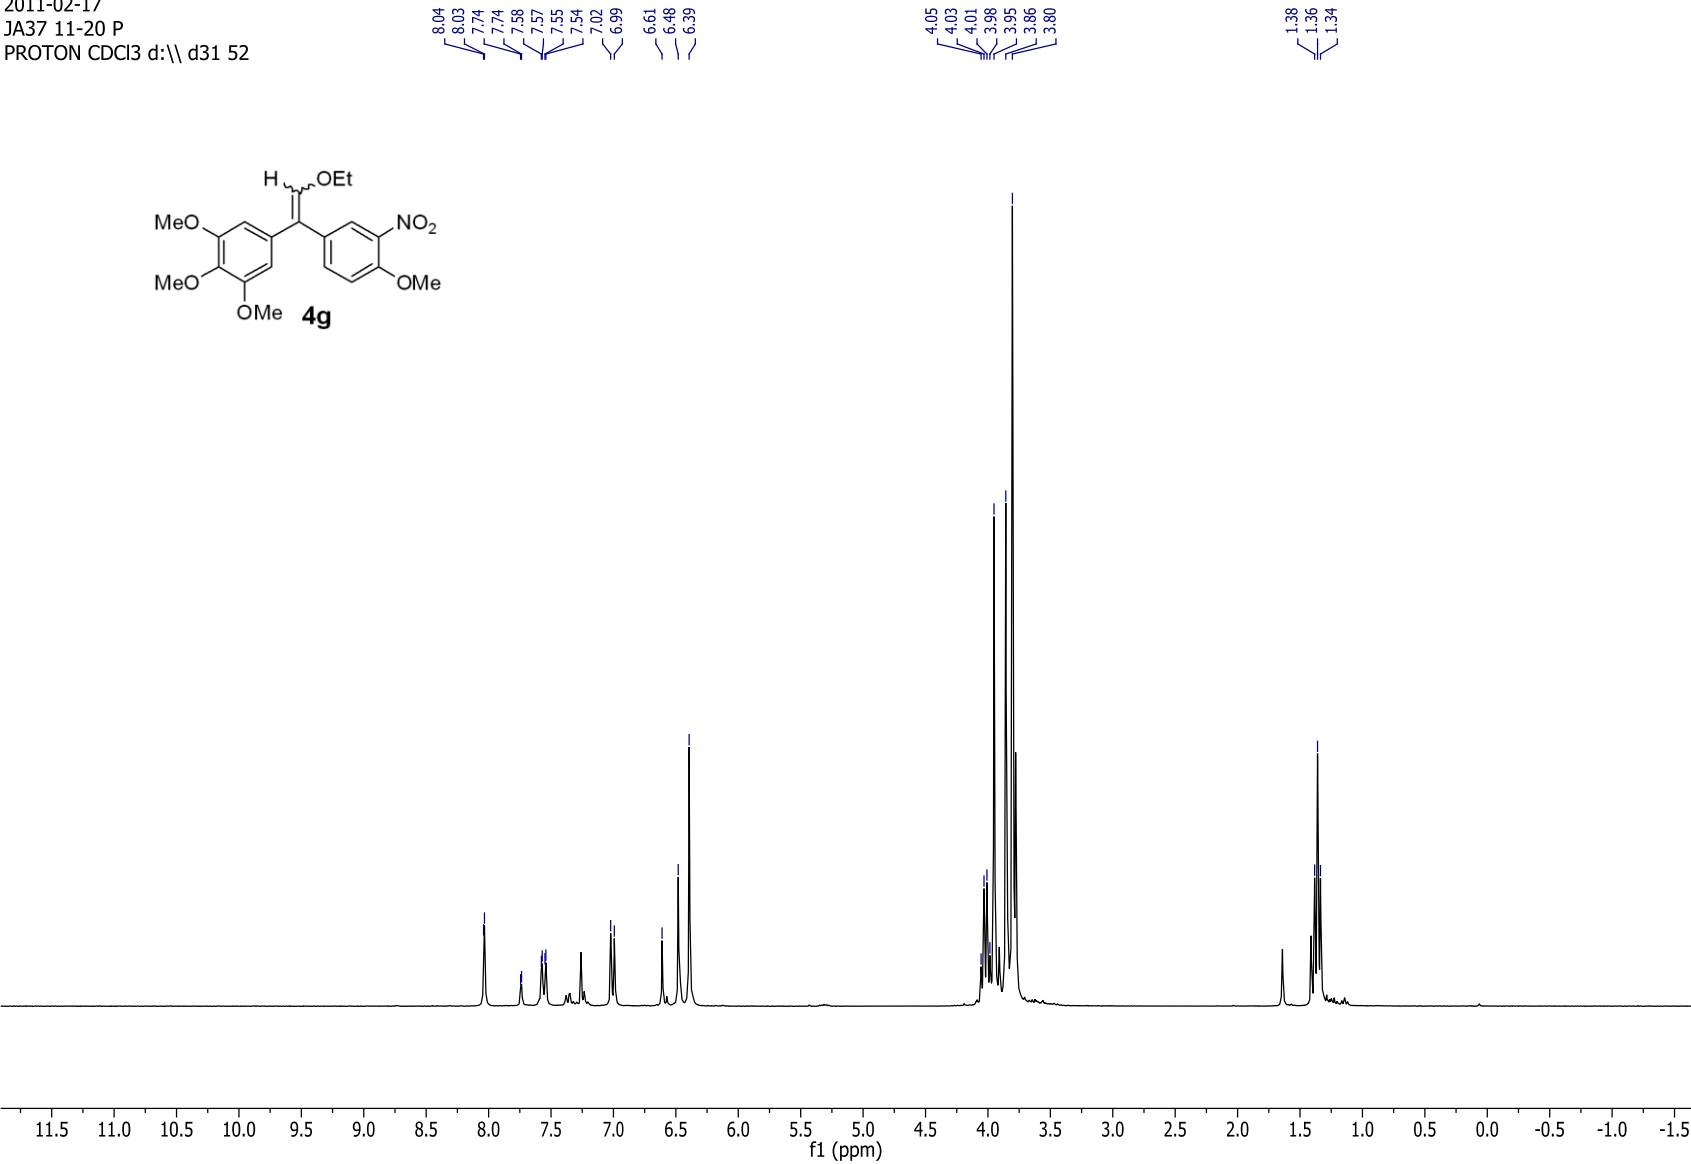

2011-02-18  
JA 37 11-20 P  
JMOD CDCl3 d:\\ d31 22

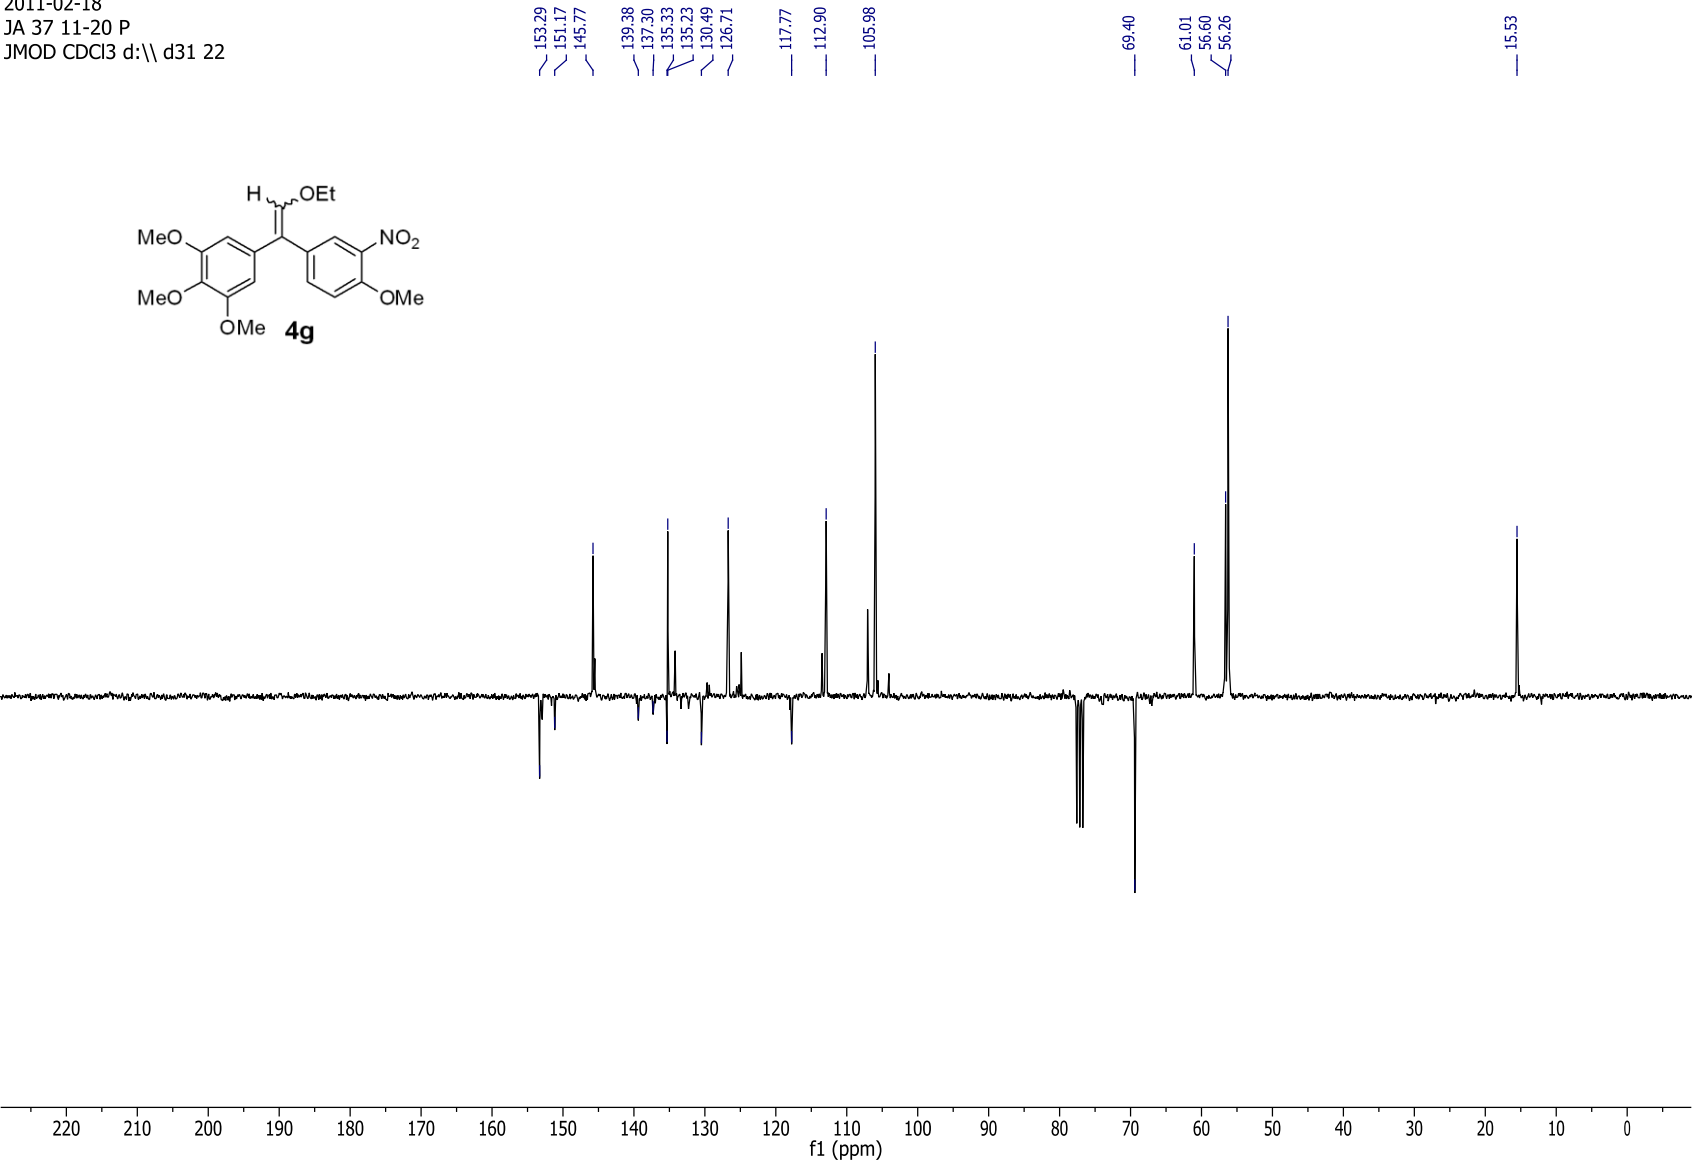

ja124p  
JA124P ds acetone-d6  
PROTON

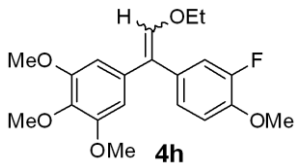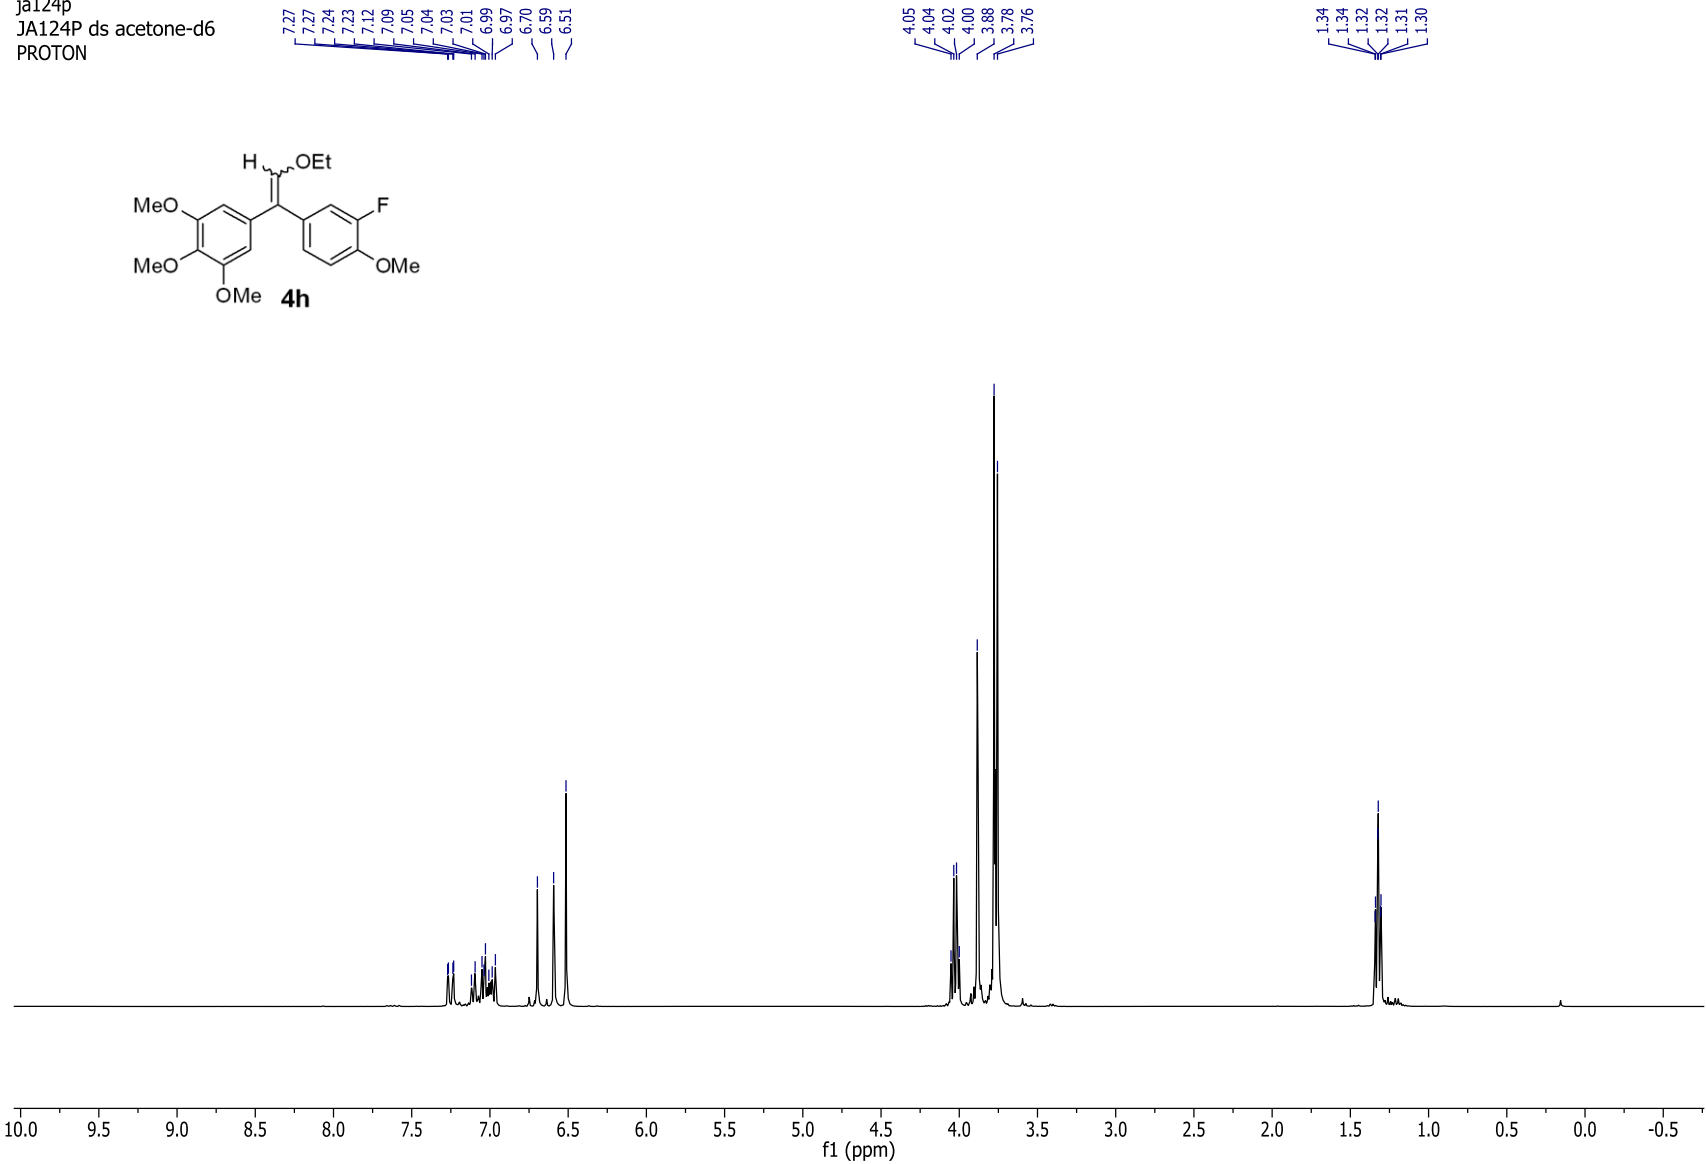

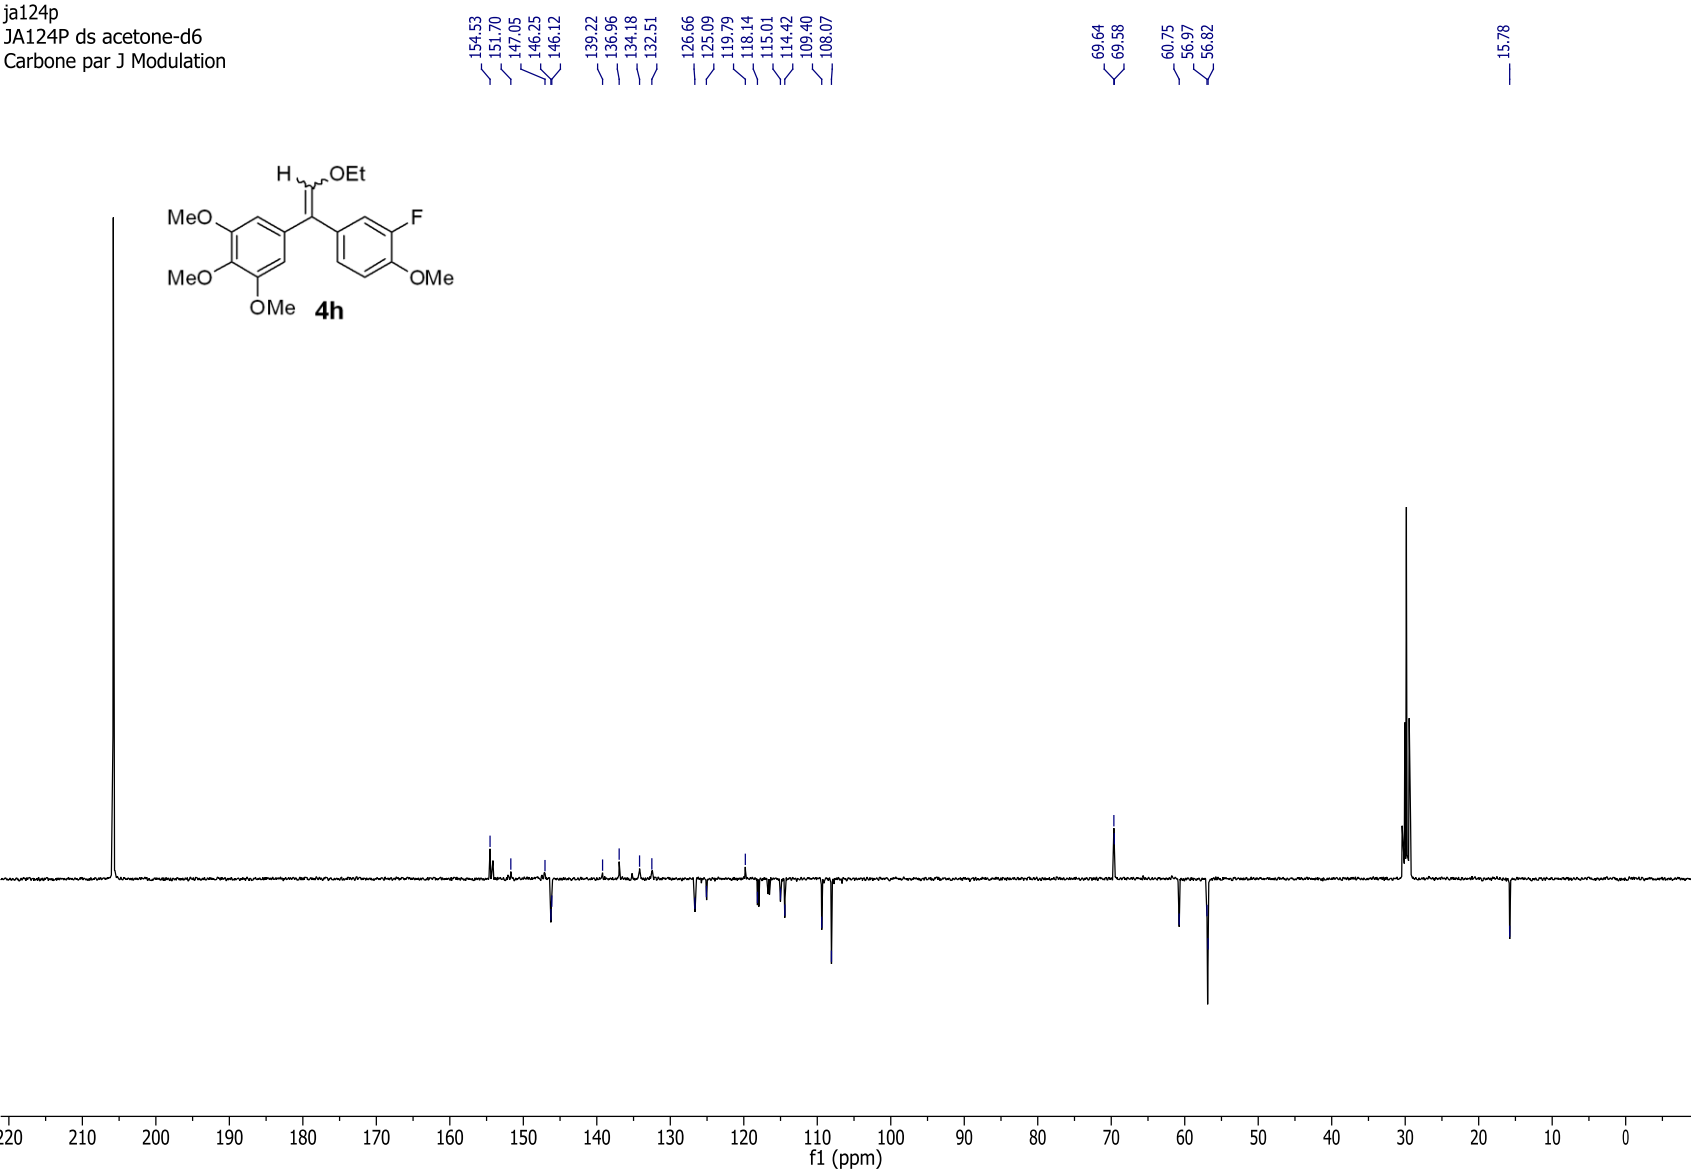

2012.04.17  
JA124'  
F19CPD Aceton v biocis 7

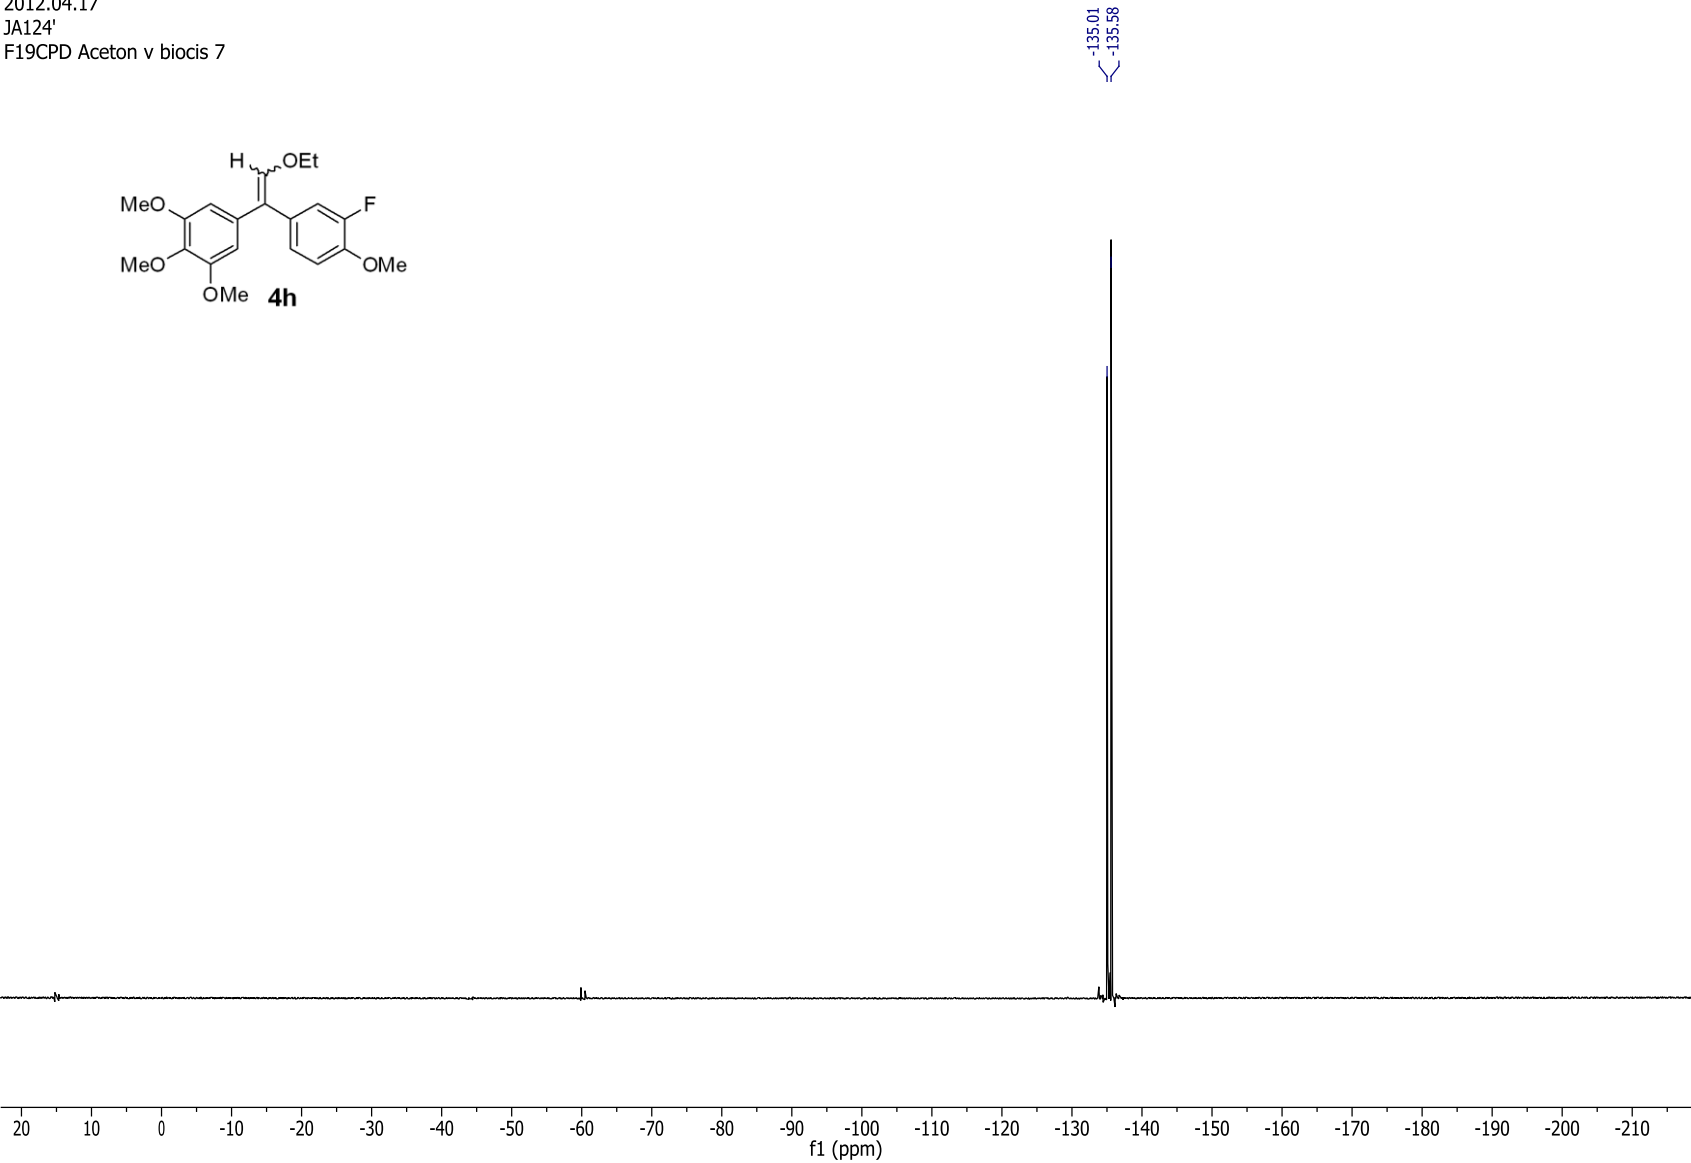

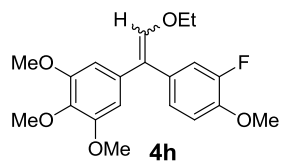

JA124P de acetone-d6  
NOESY Correlations spatiales H...H

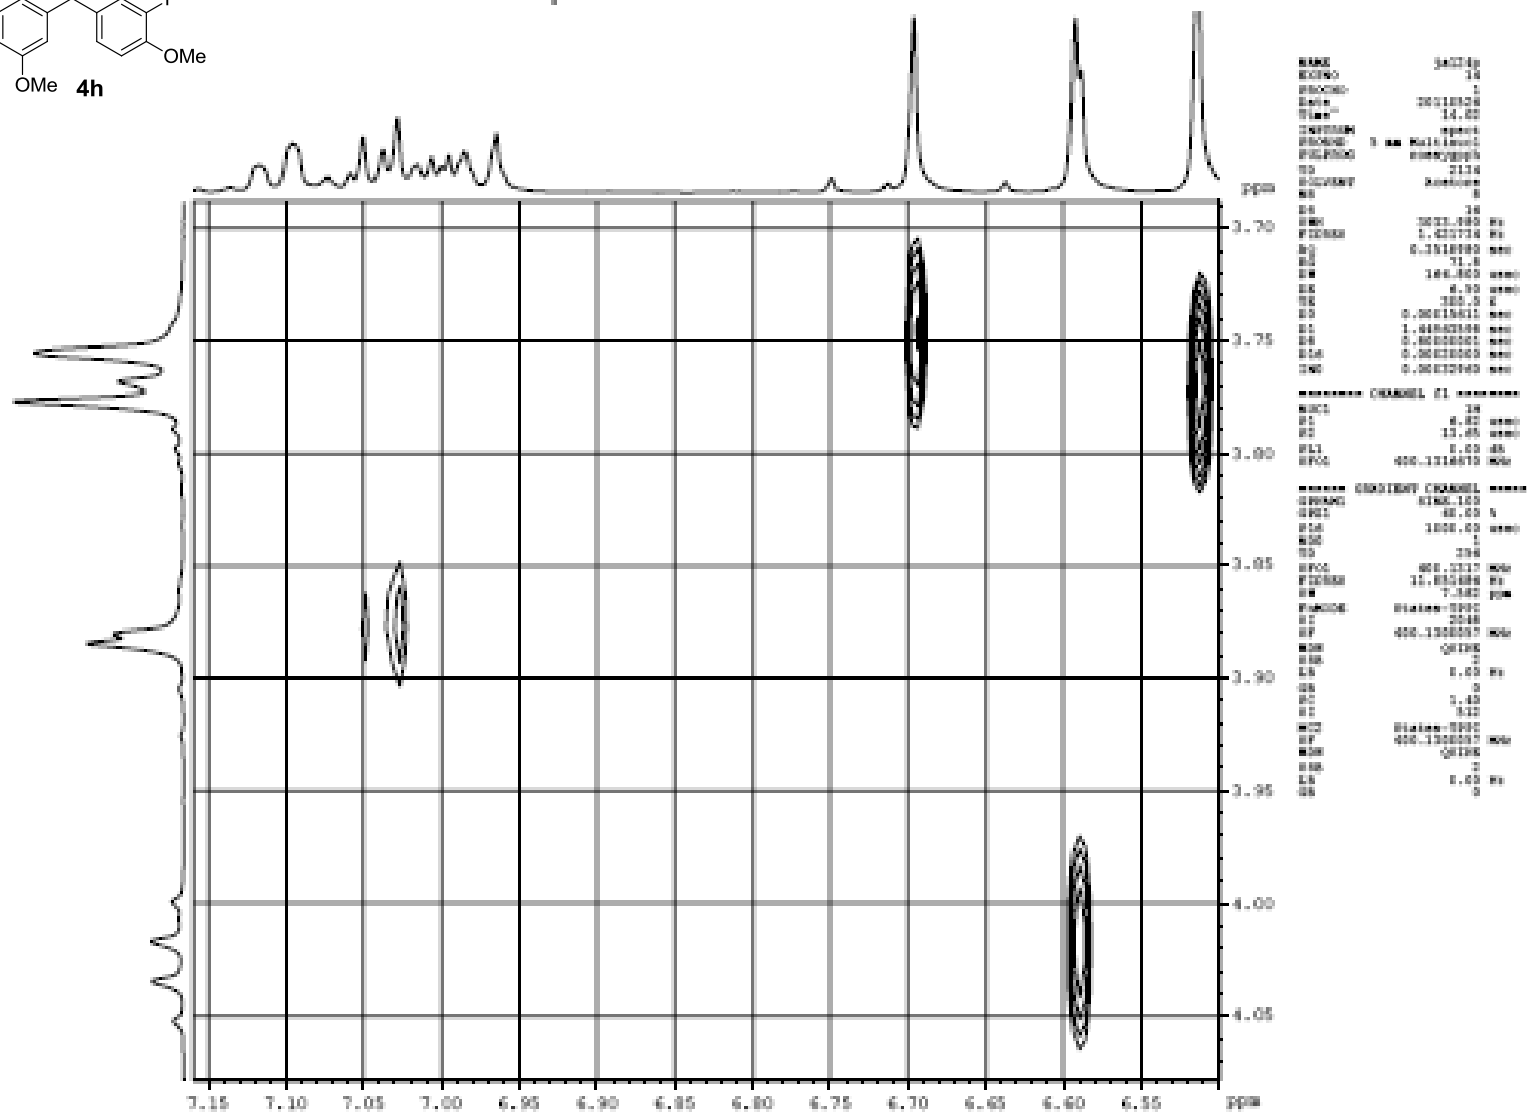

ja75p  
JA75P ds acetone-d6  
PROTON

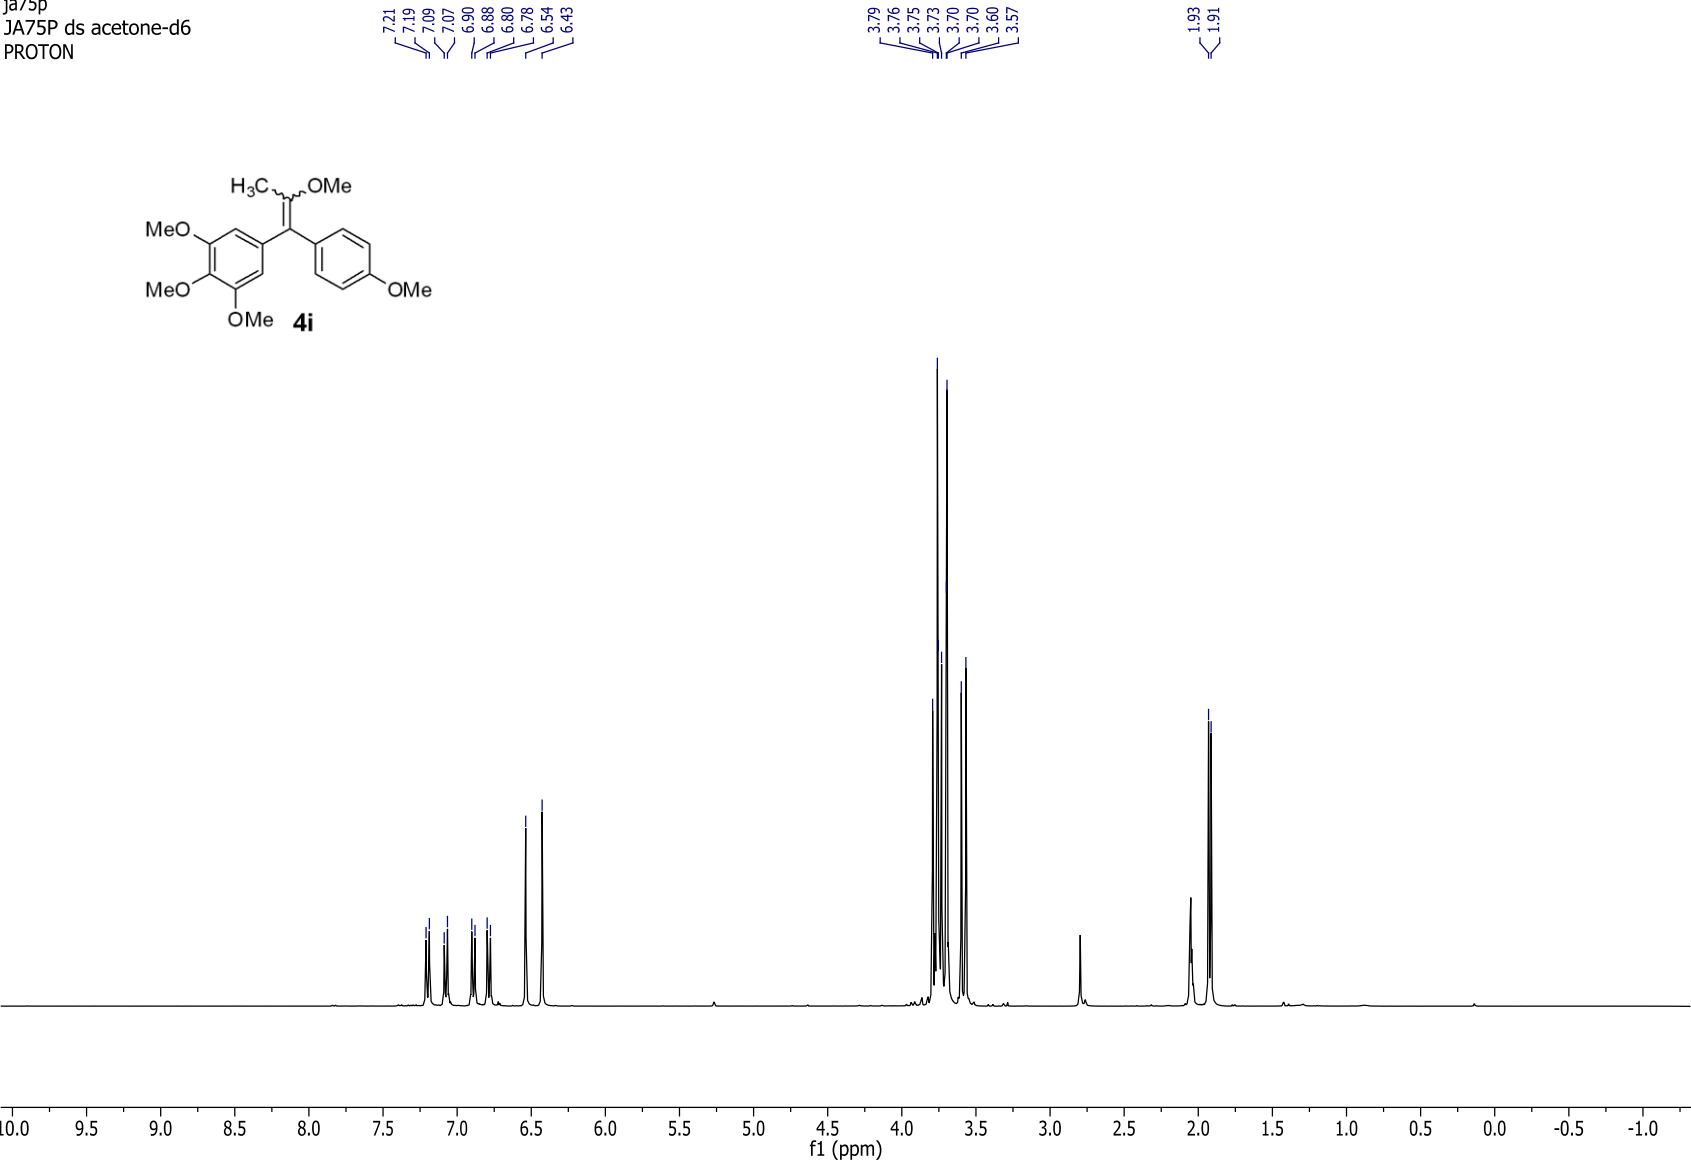



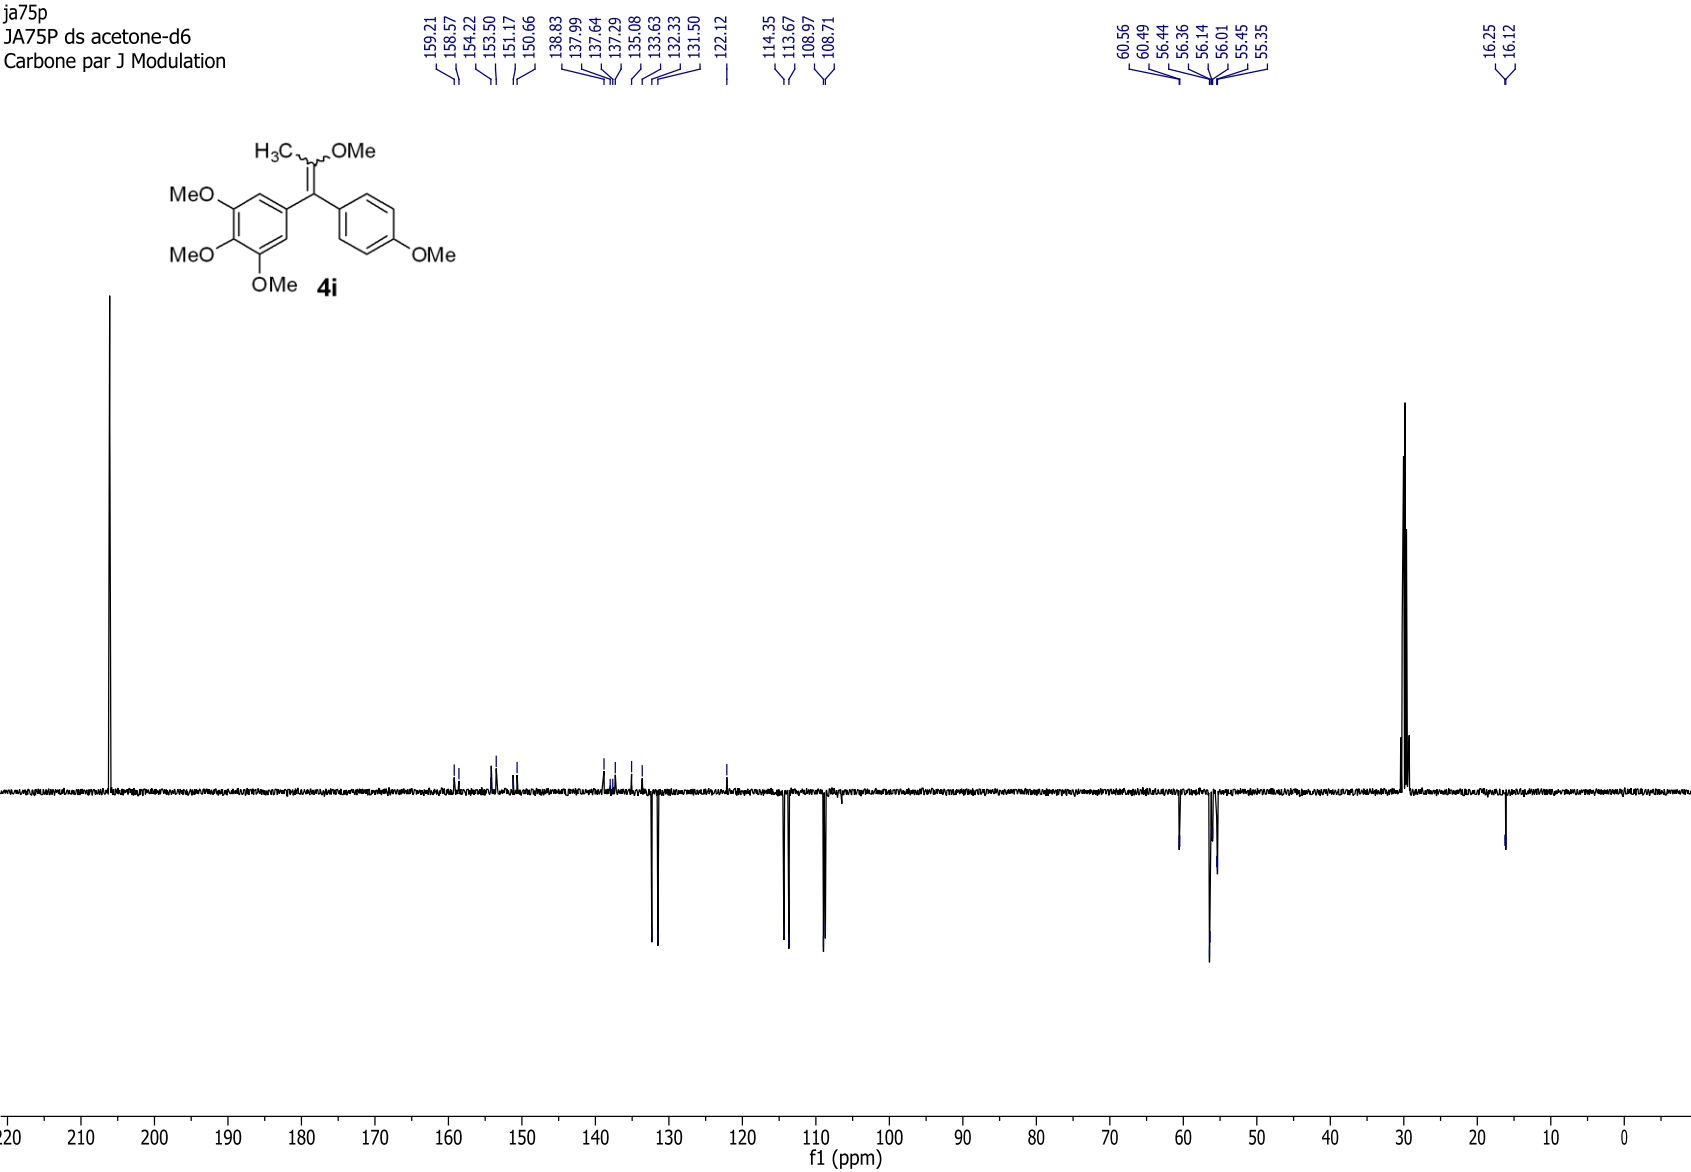

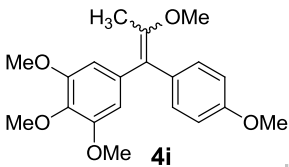

JA75P d8 acetone-d6  
NOESY Correlations spatiales H...H

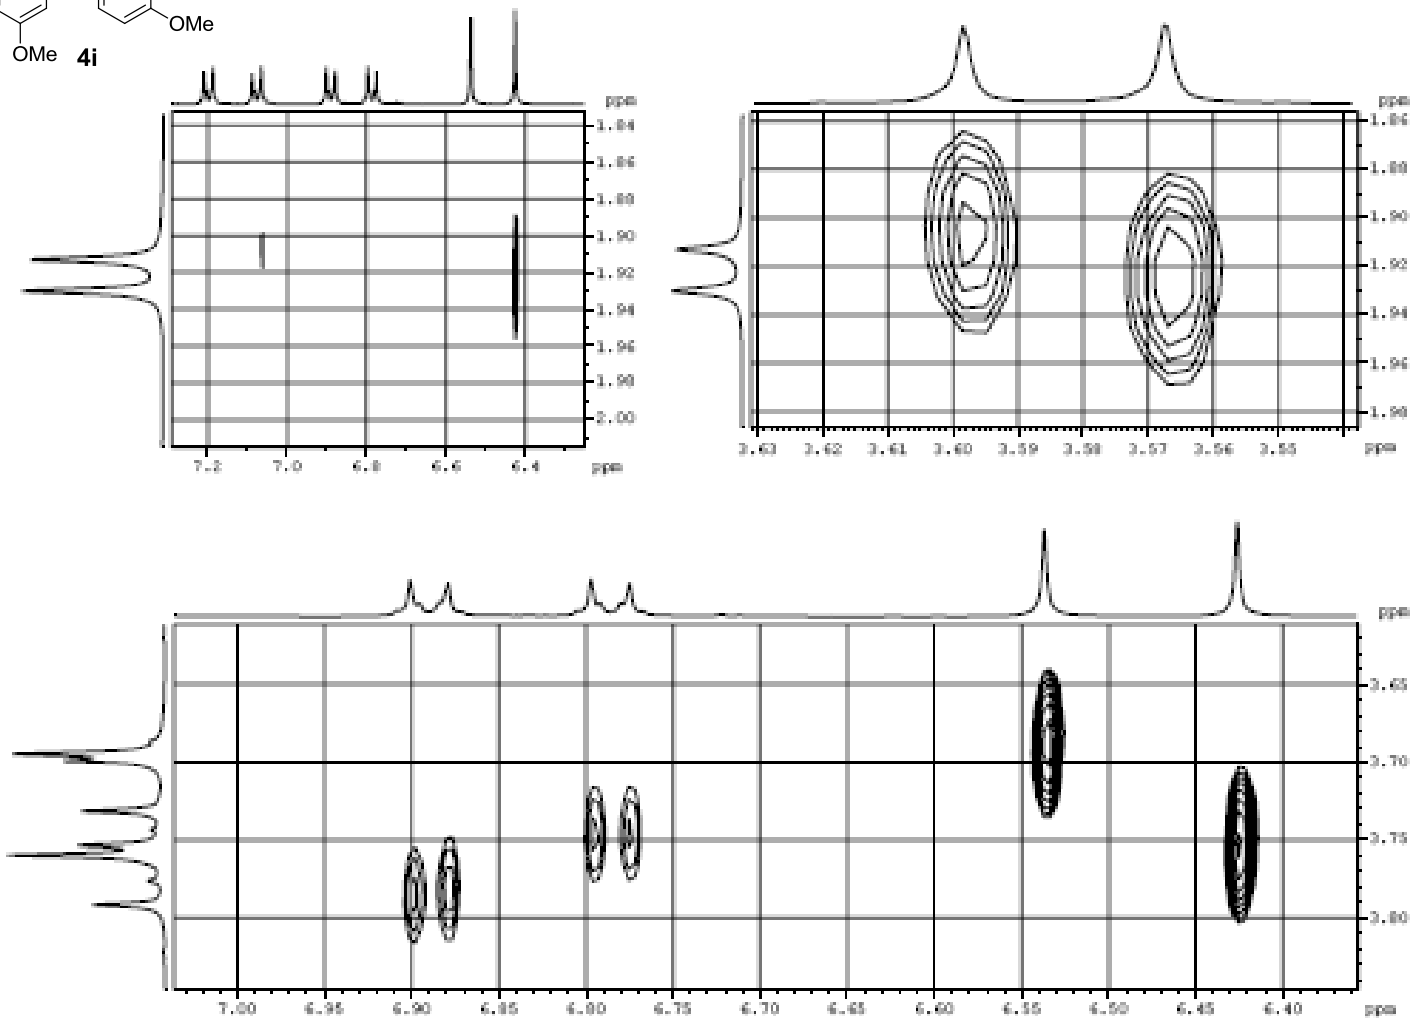

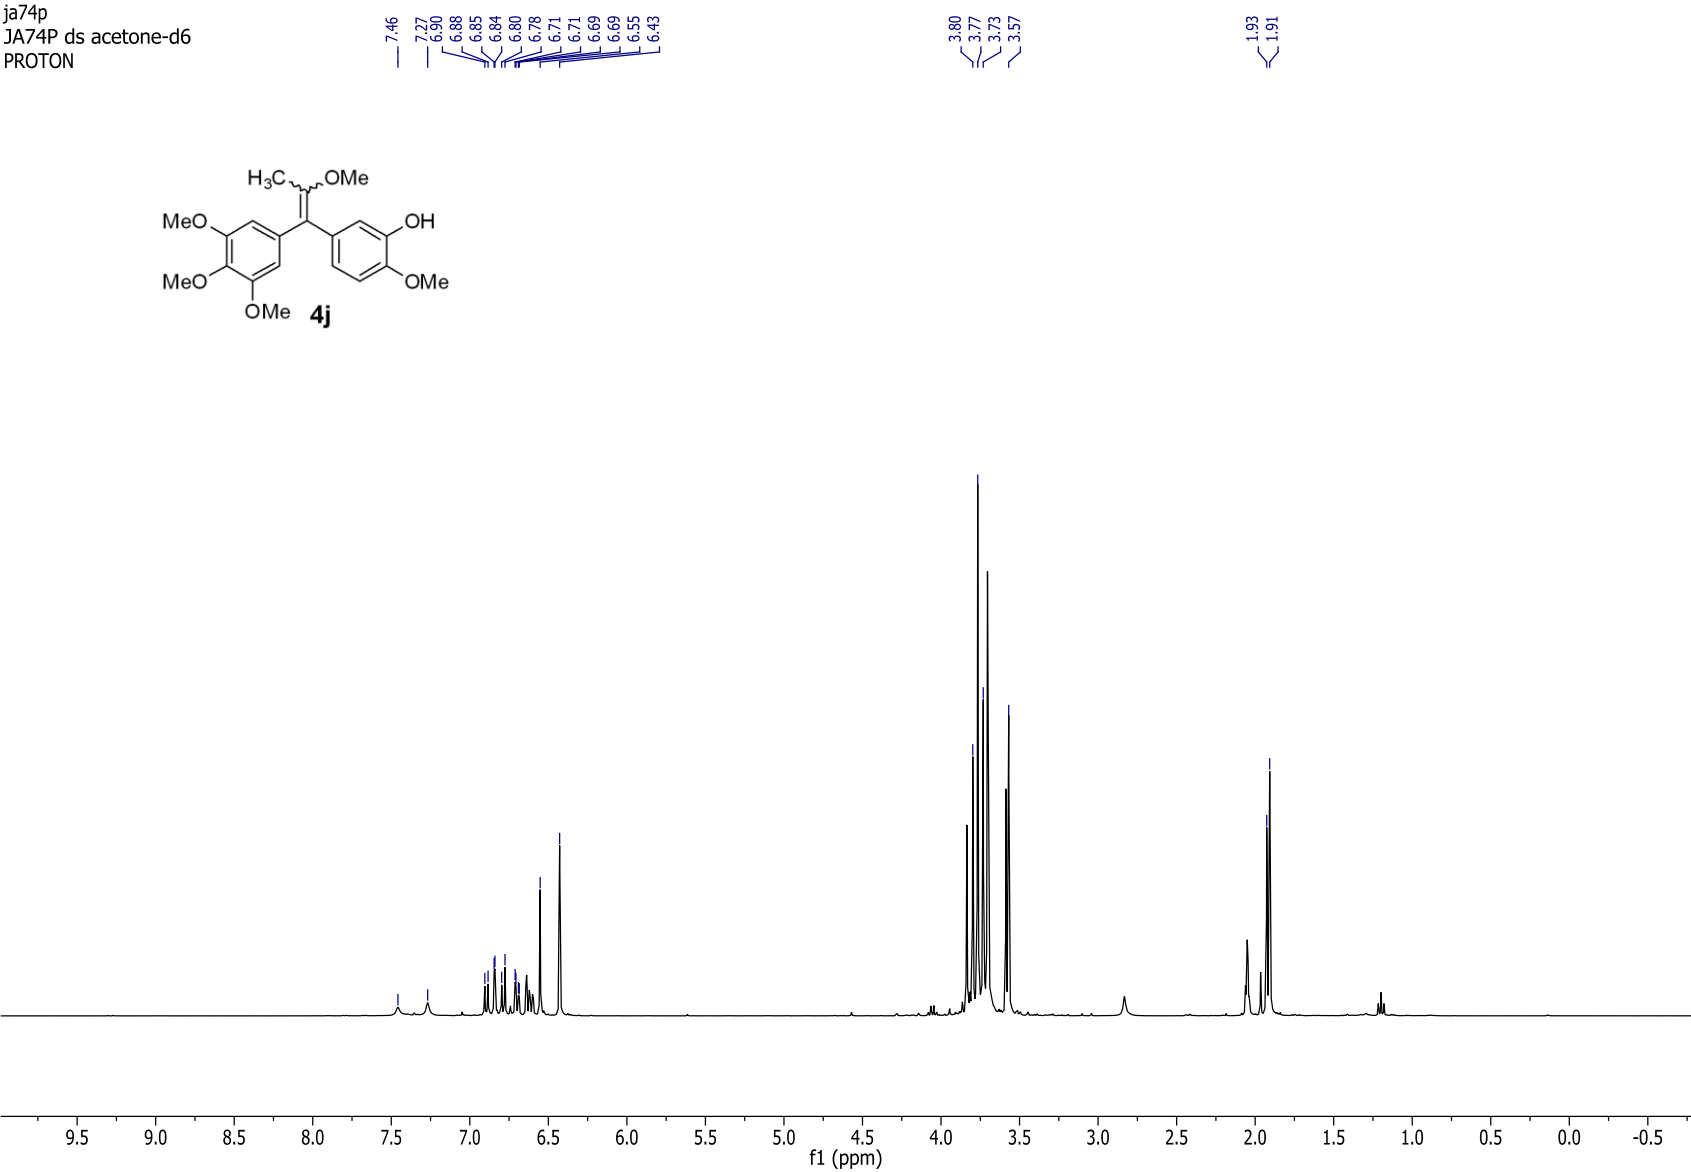

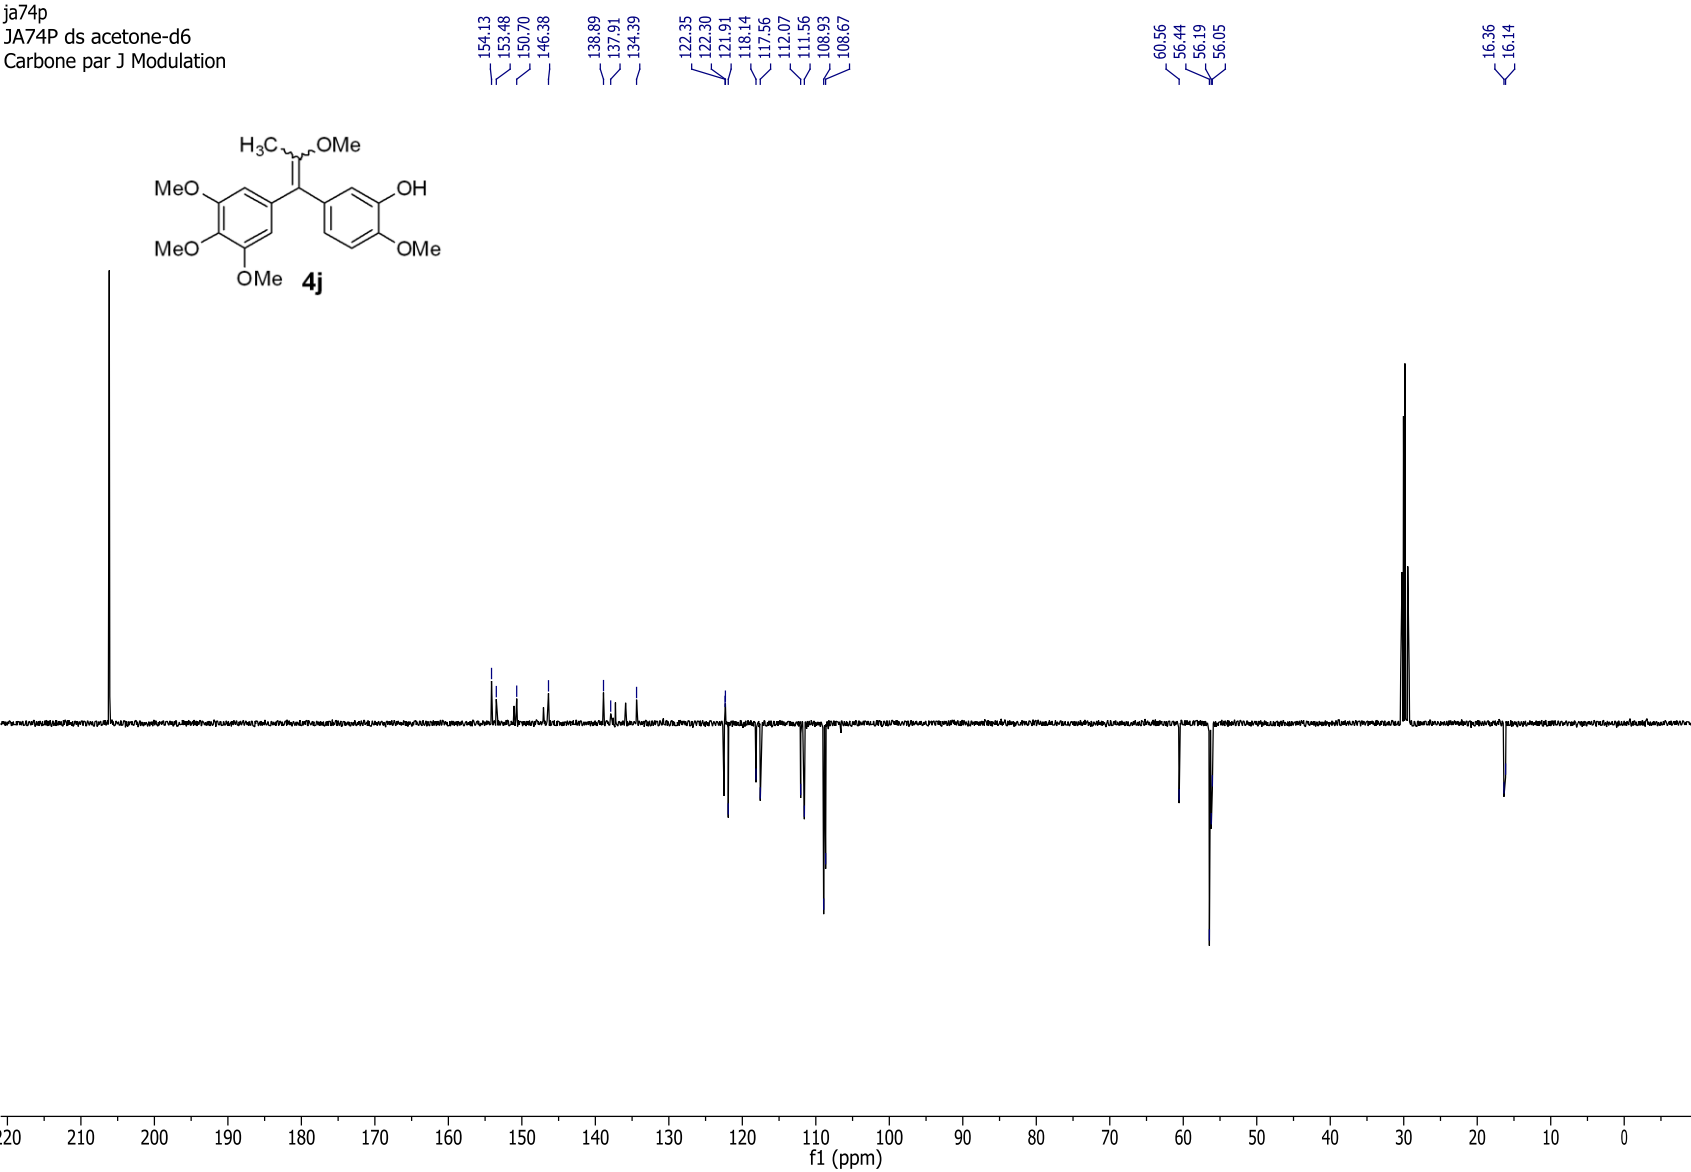

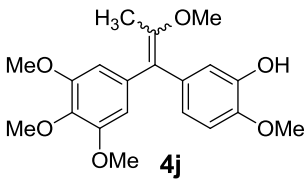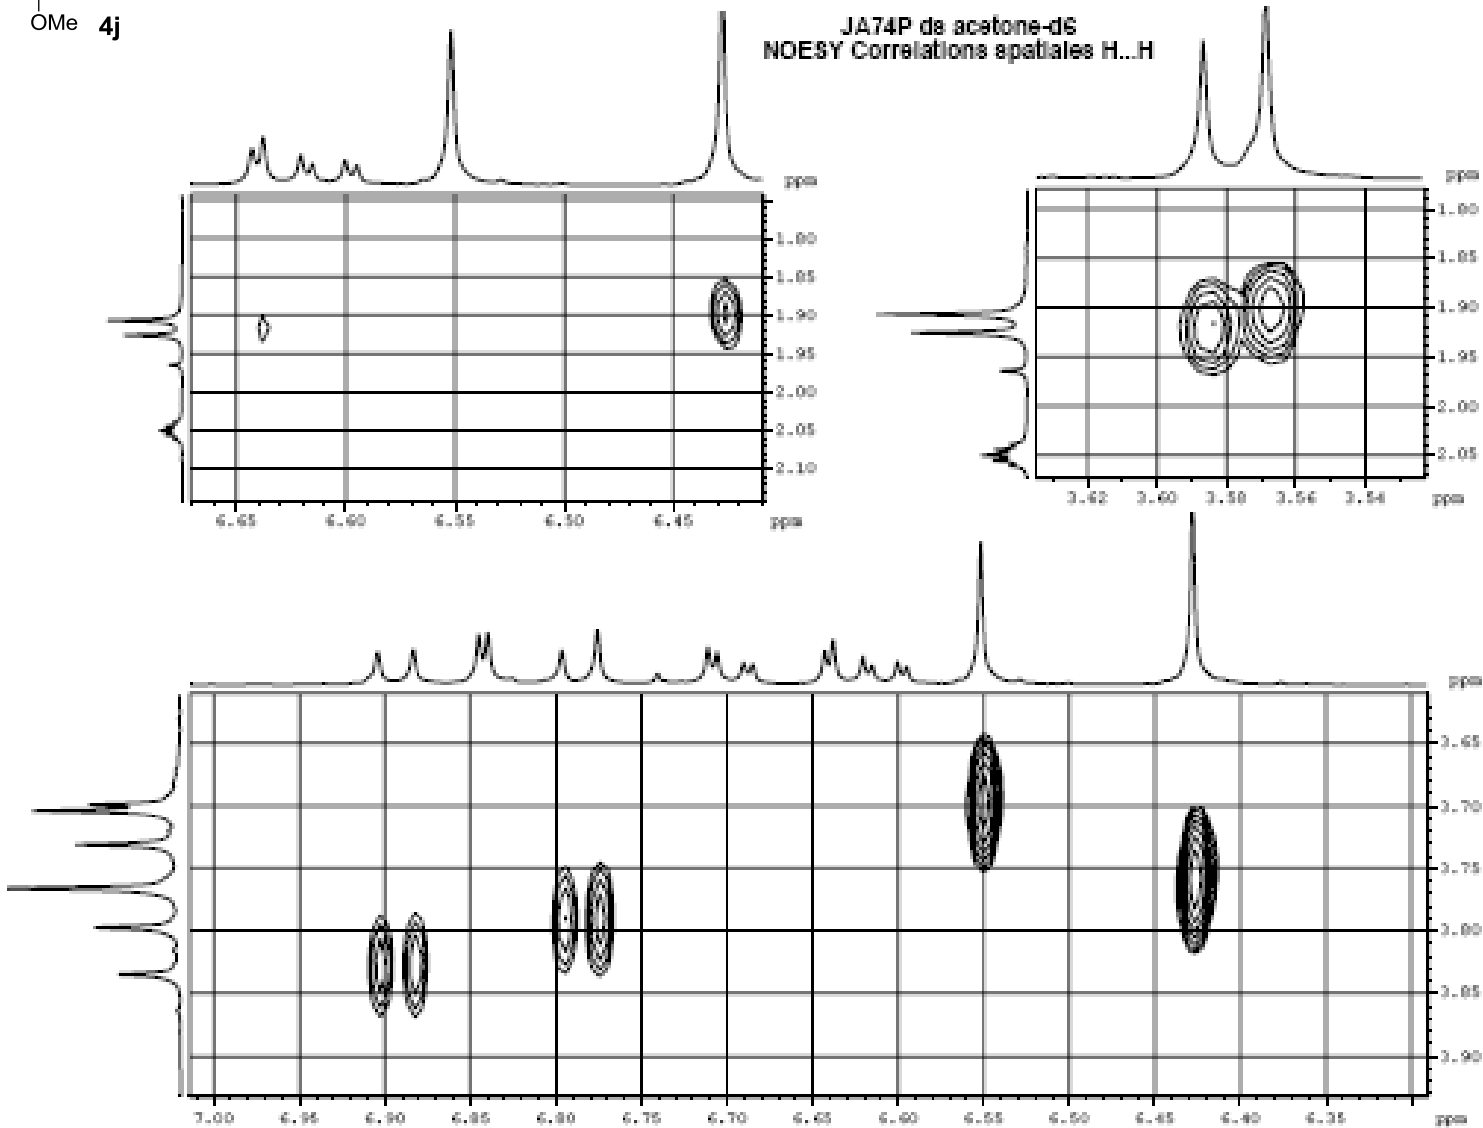

2010-03-22  
AH132  
PROTON CDCl3 d:\ d31 15

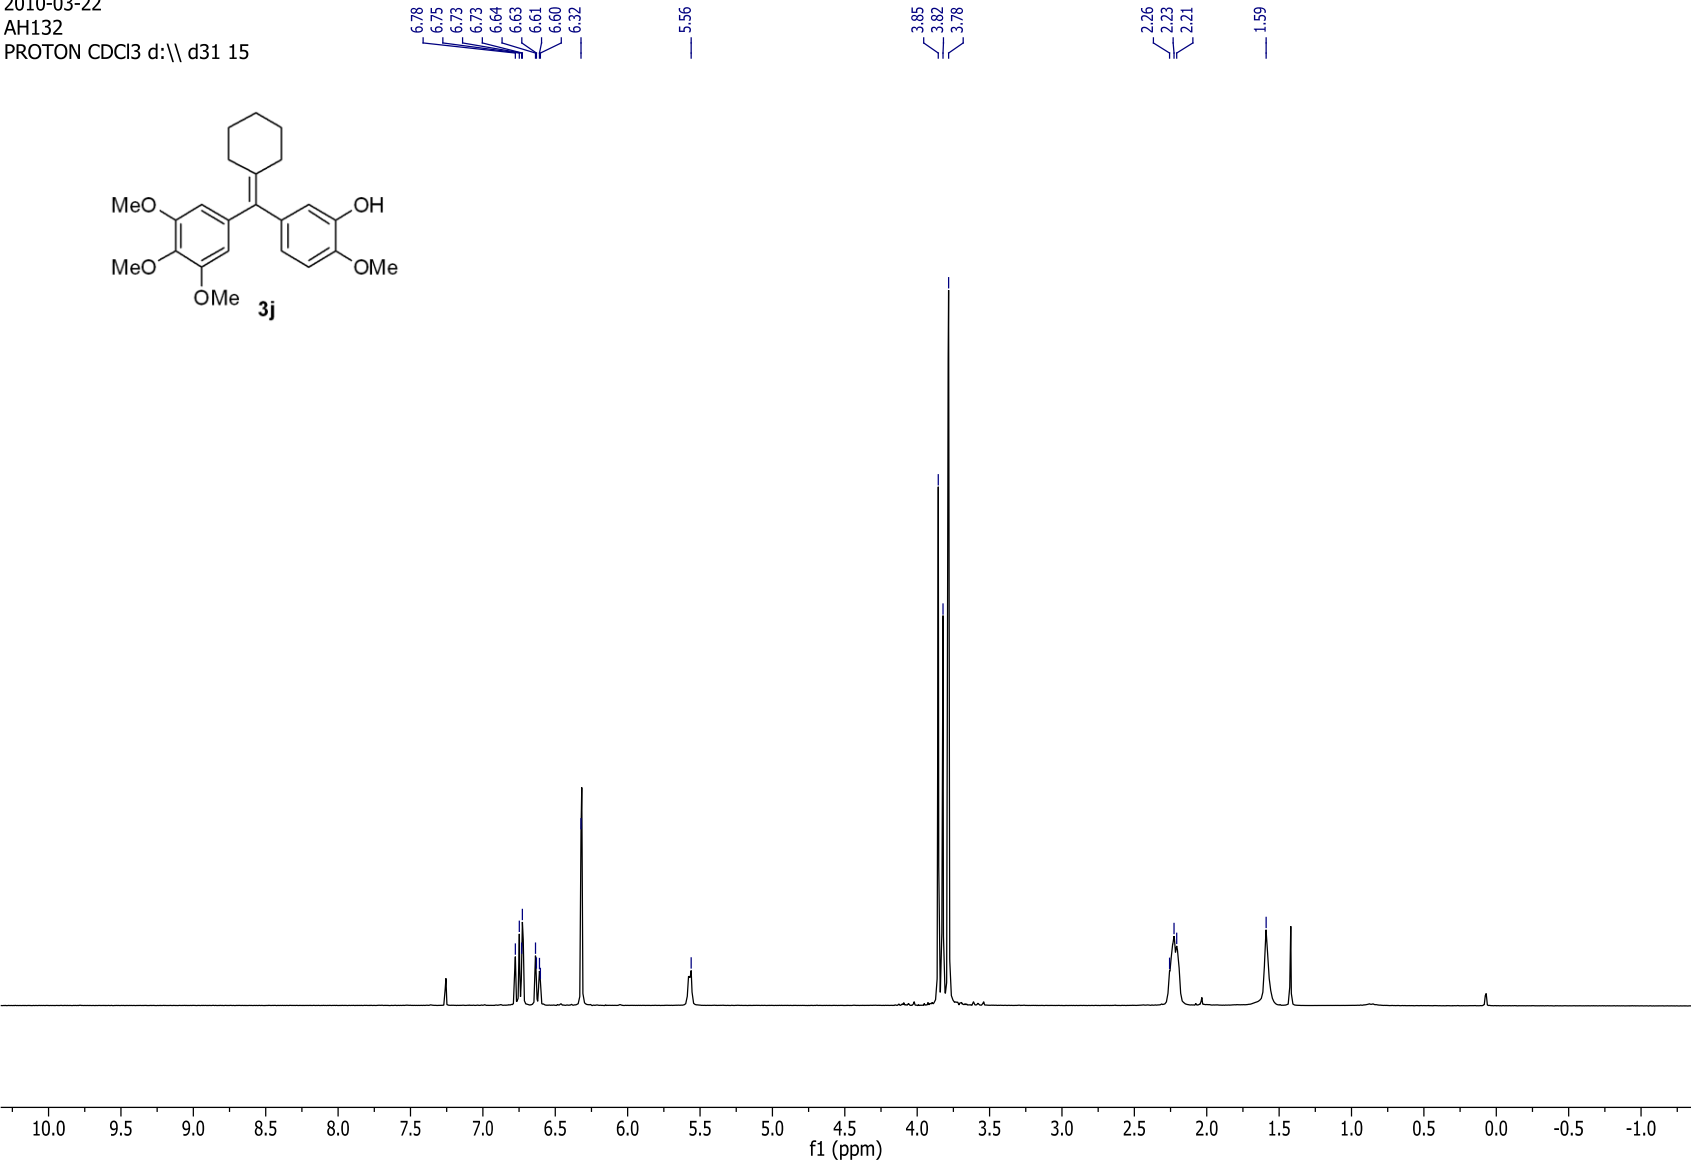

2010-03-24  
AHEB132  
JMOD CDCl3 d:\\ d31 34

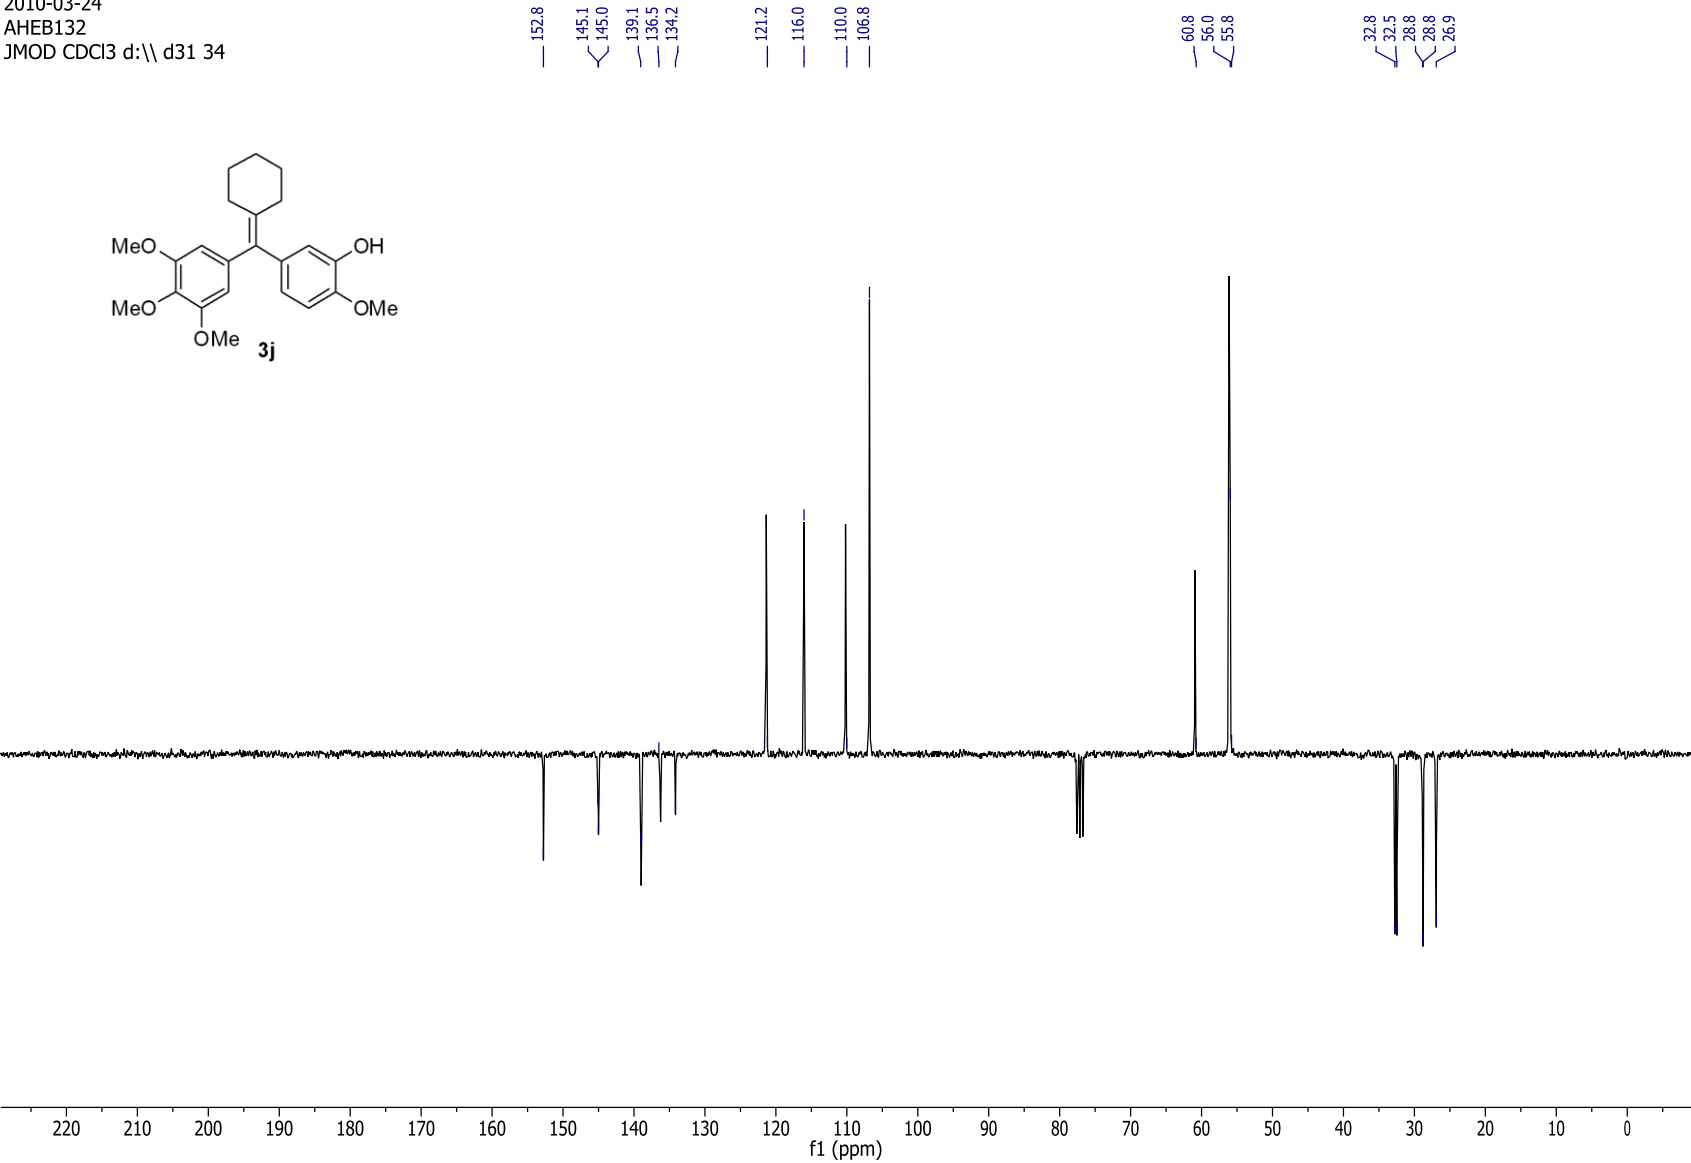

2010.03.29  
AHEB142  
PROTON CDCl3 v biocis 15

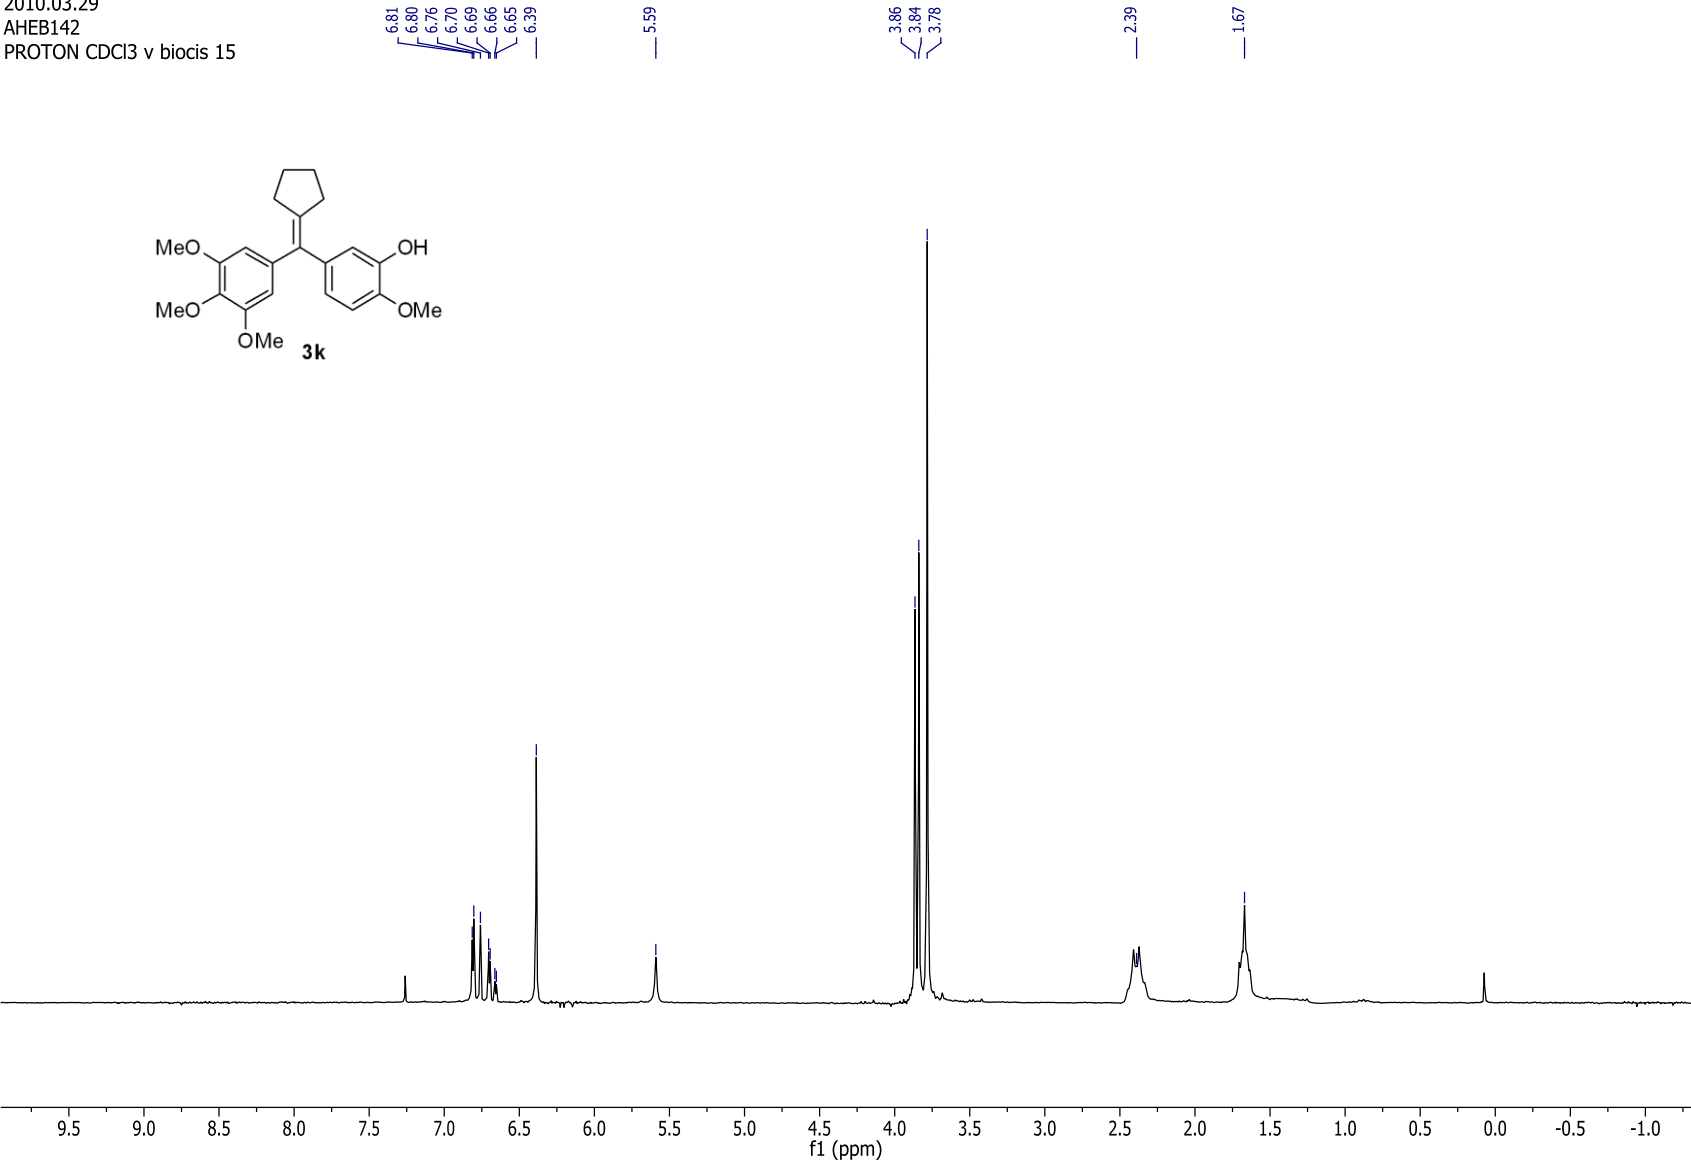



2010-03-29  
AHEB142  
JMOD CDCl3 d:\\ d31 60

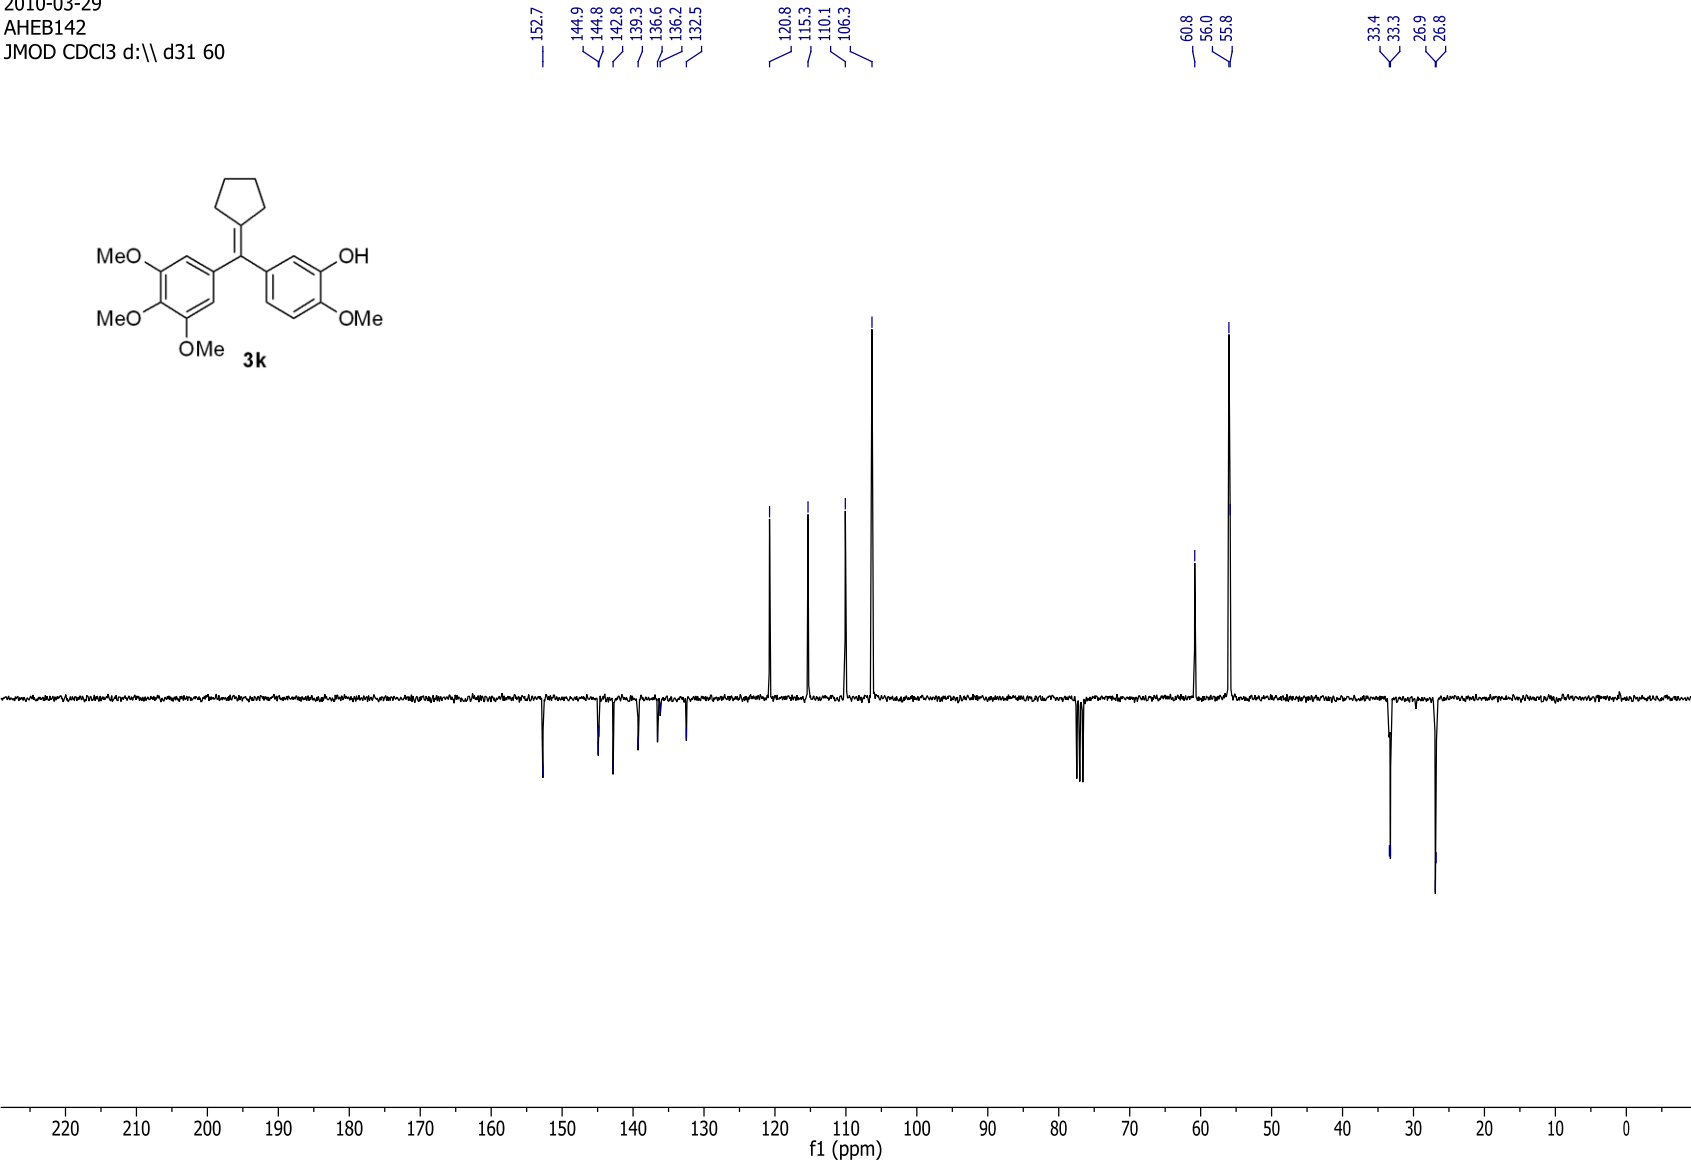

2010-05-07  
AHEB185-1  
PROTON CDCl3 d:\ d31 1

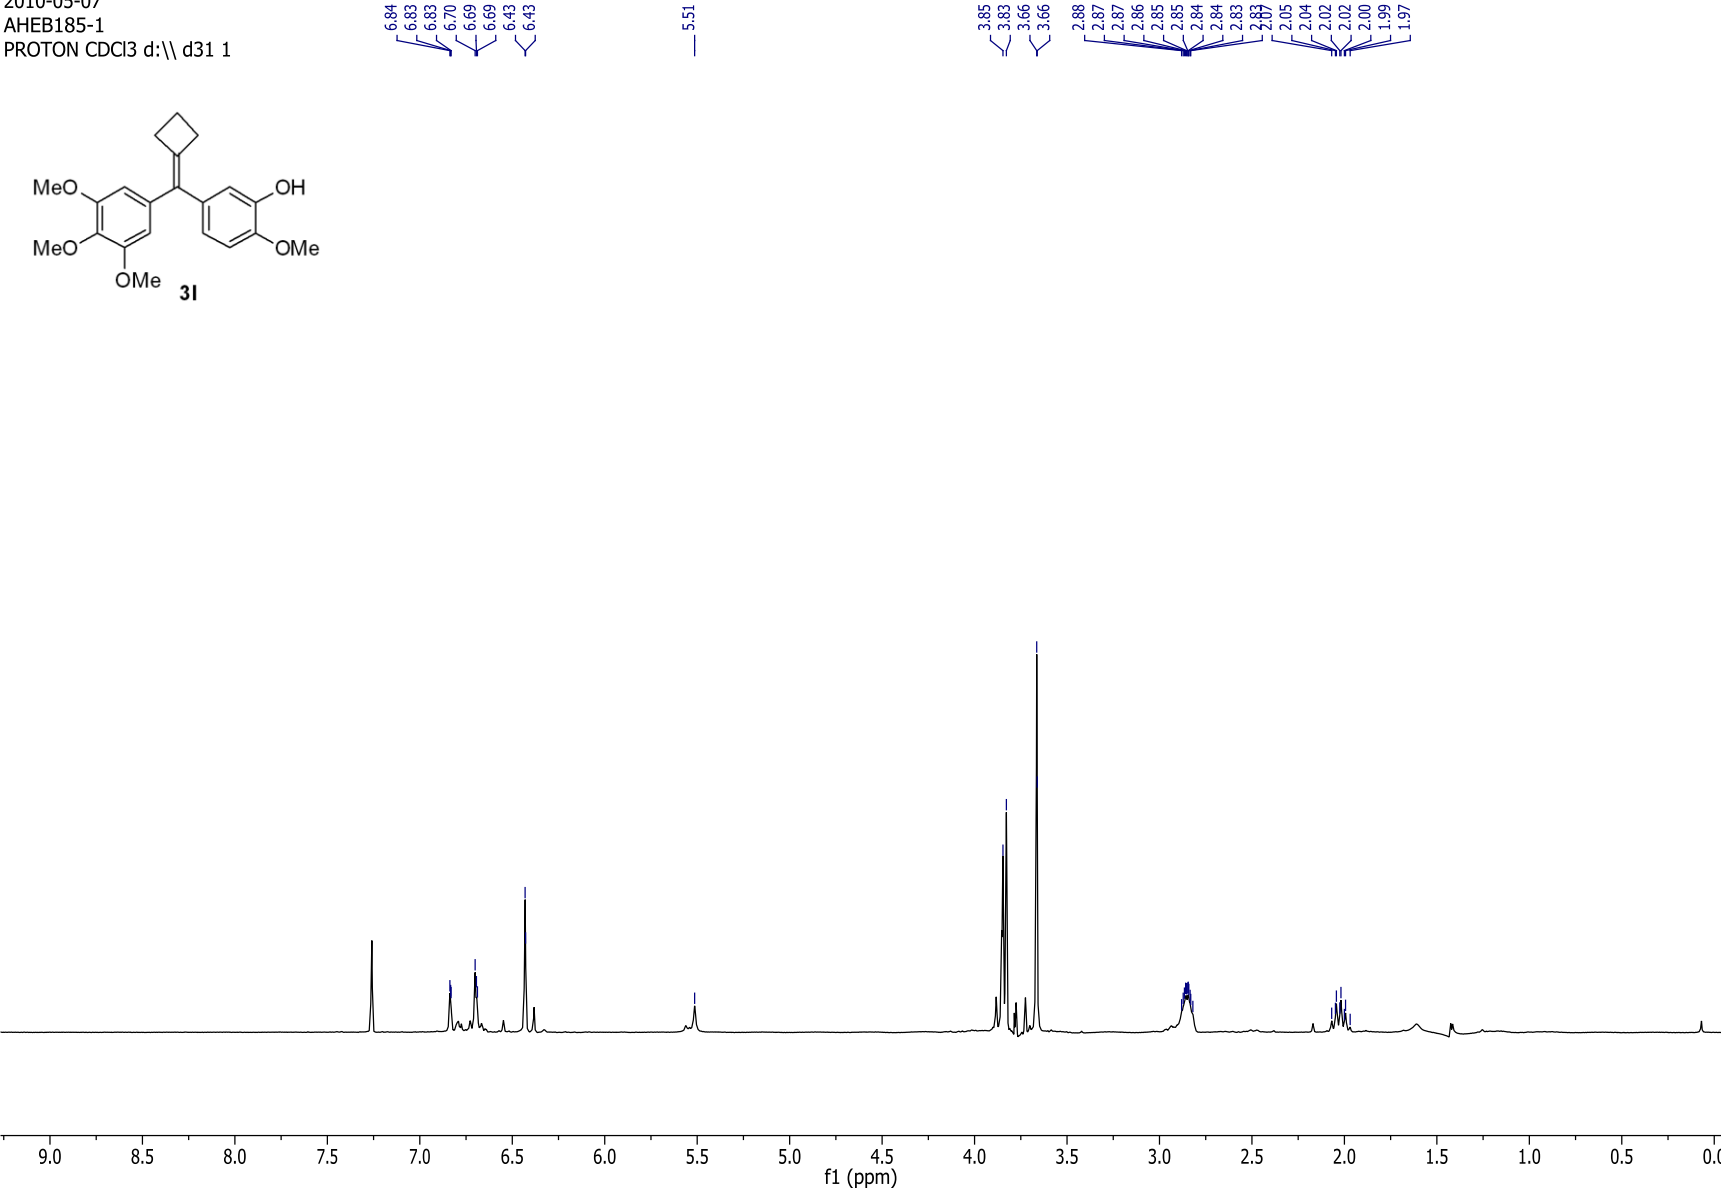

2010-05-07  
AHEB185  
JMOD CDCl3 d:\\ d31 47

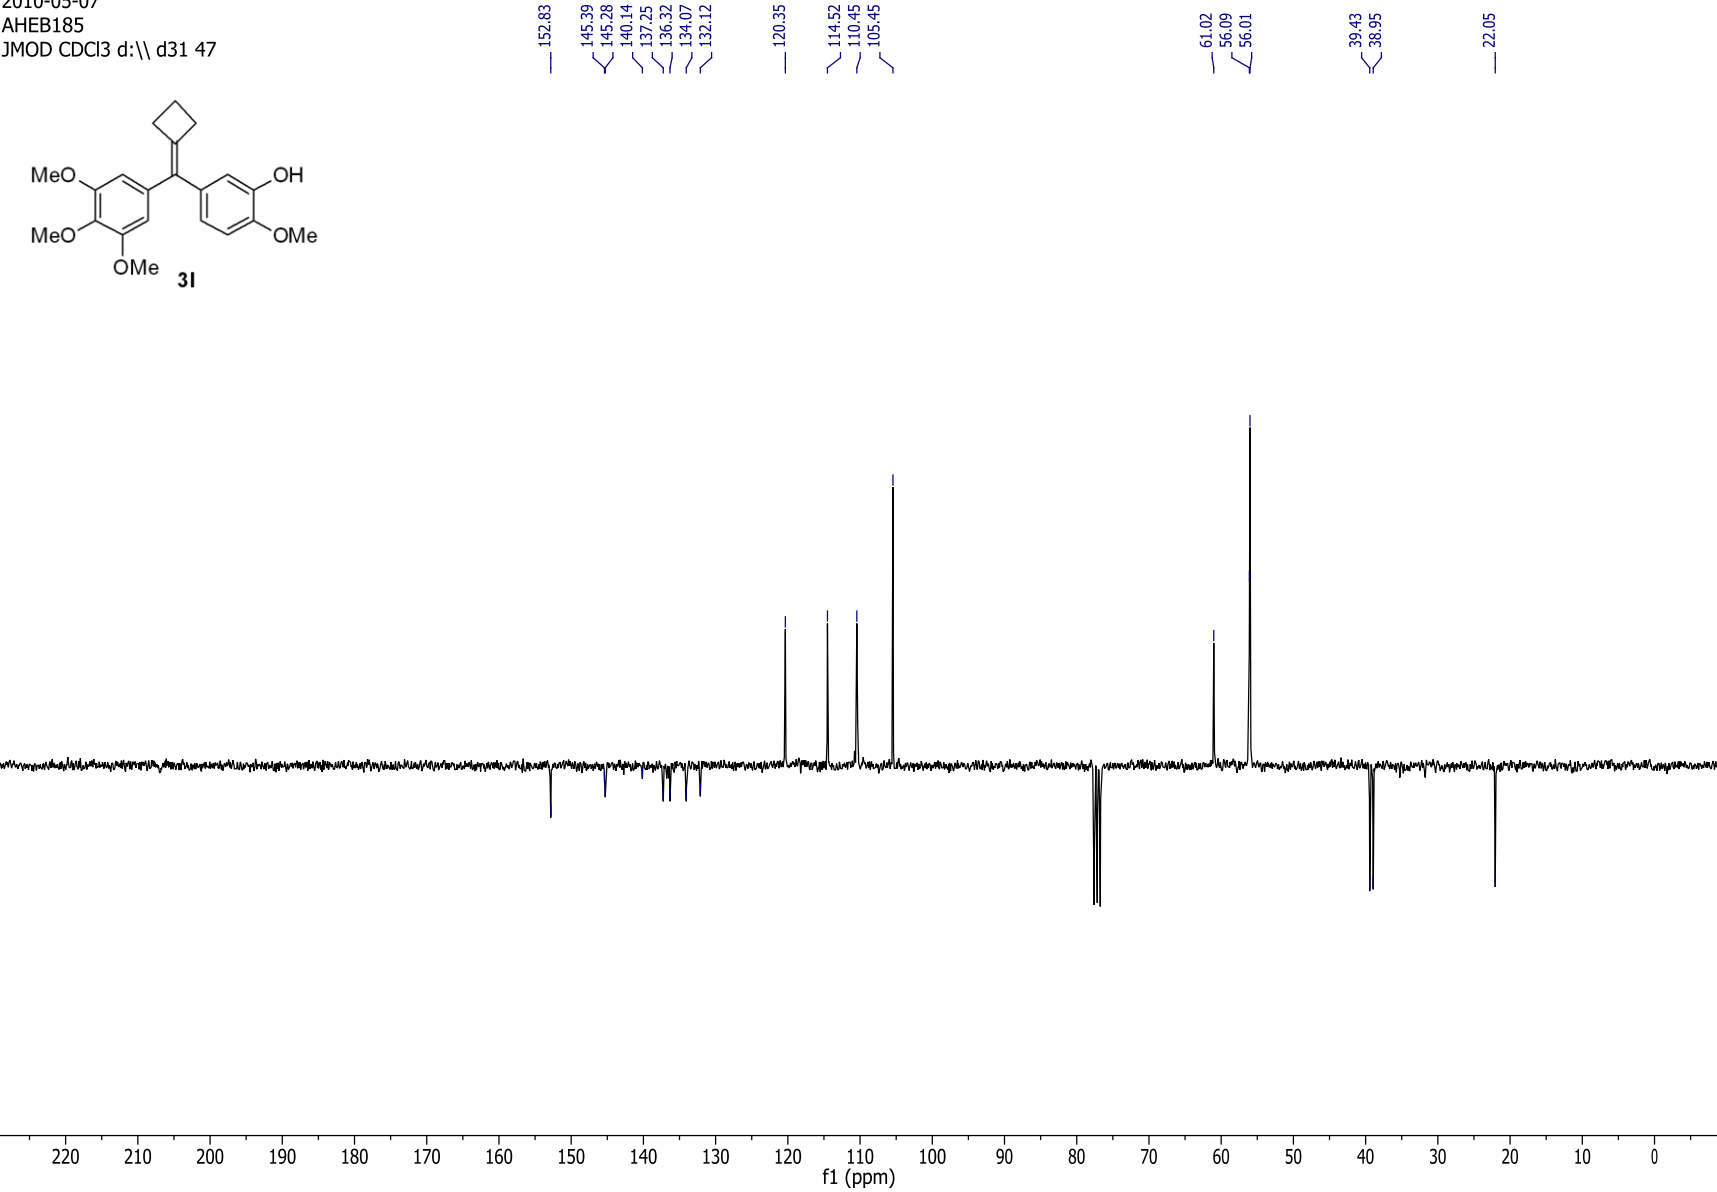

2010-03-31  
AHEB143  
PROTON CDC13 d:\ d31 59

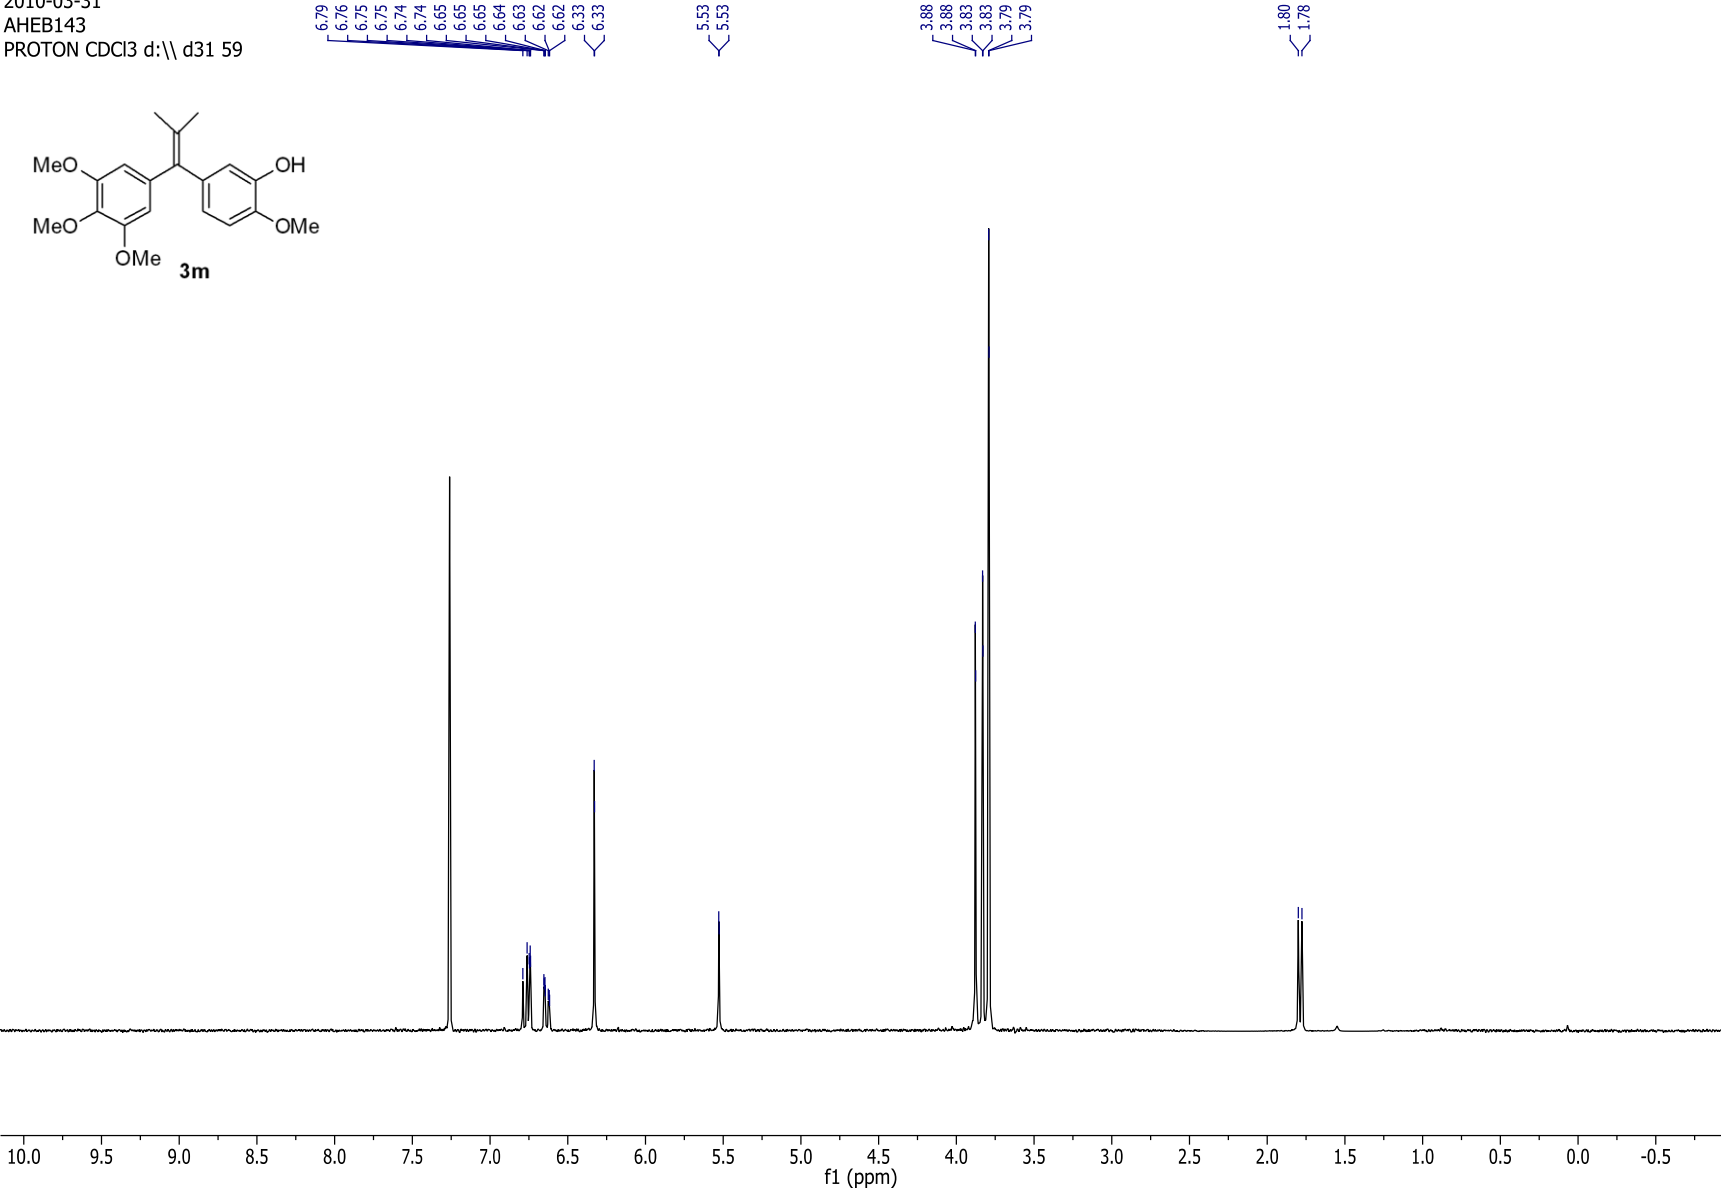

2010-03-31  
AHEB143  
JMOD CDCl3 d:\ d31 26

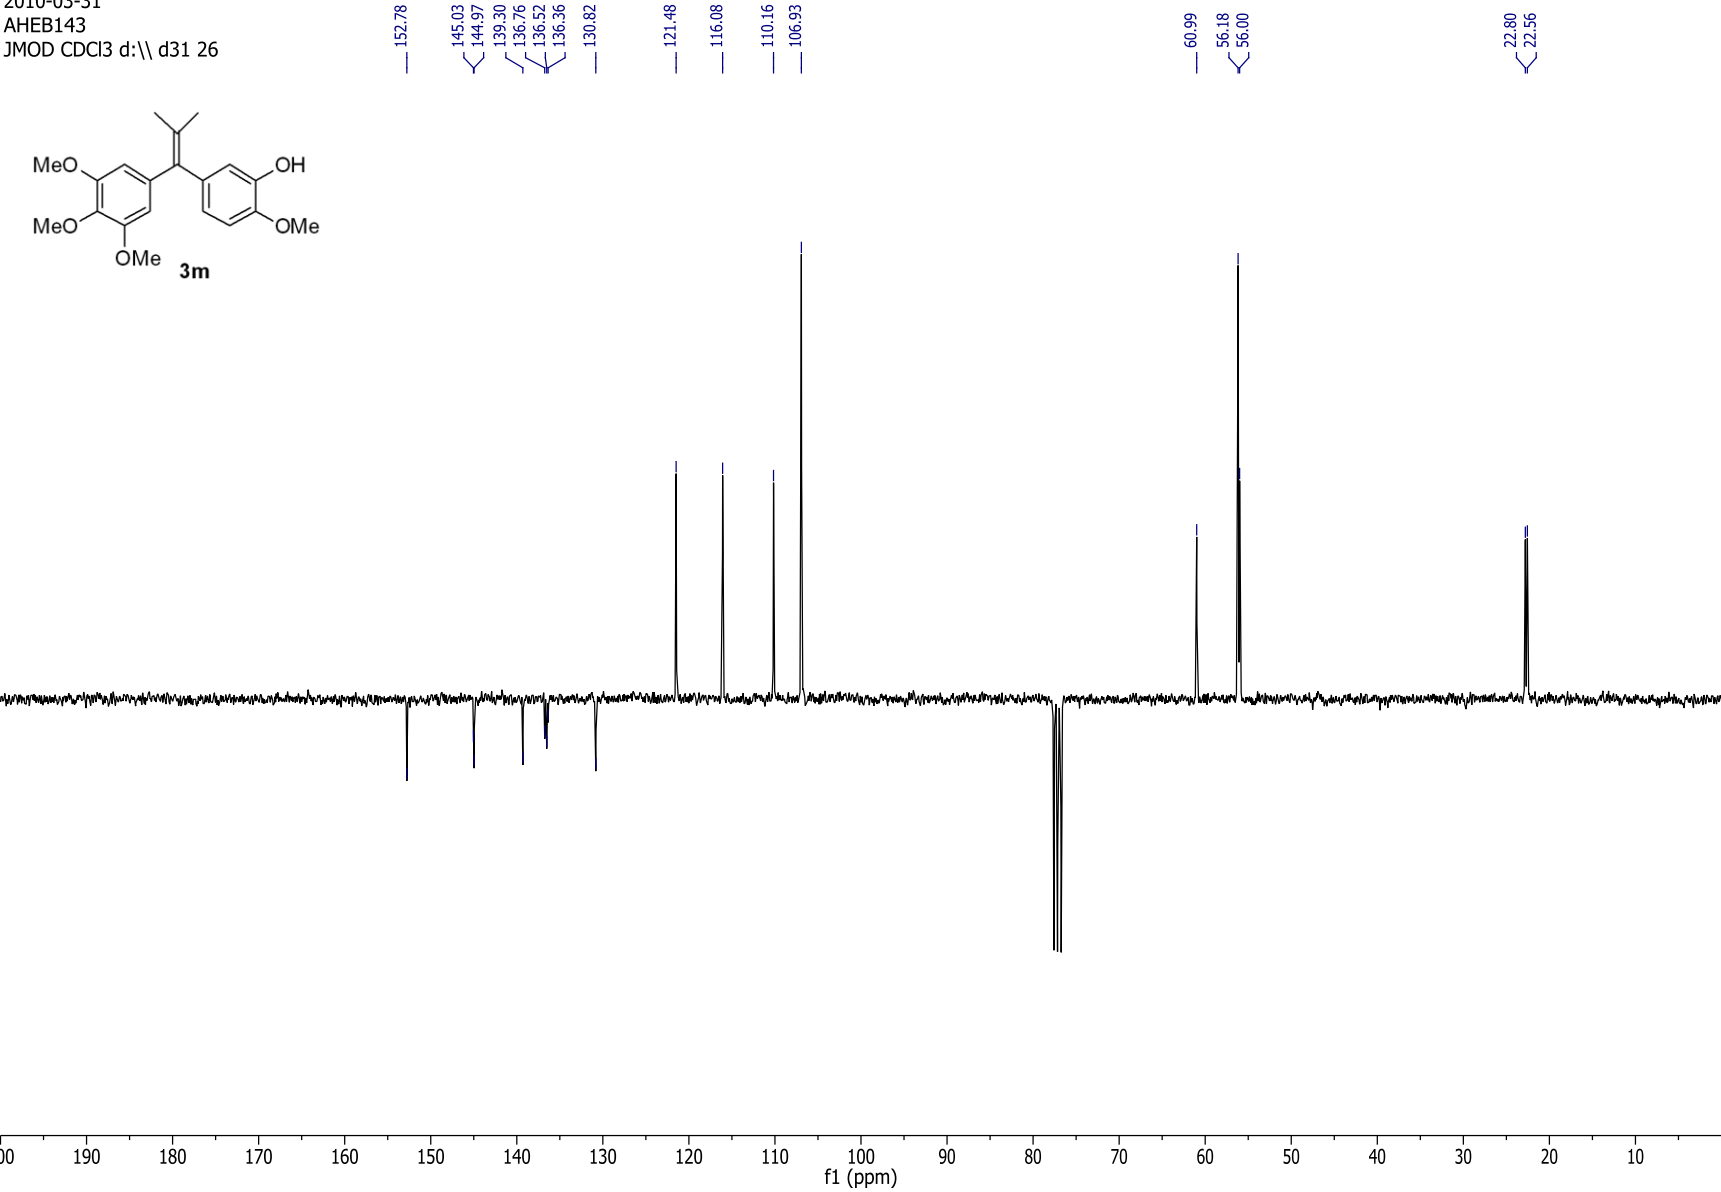

2010-03-26  
AH EB 139  
PROTON CDCl3 d:\ d31 36

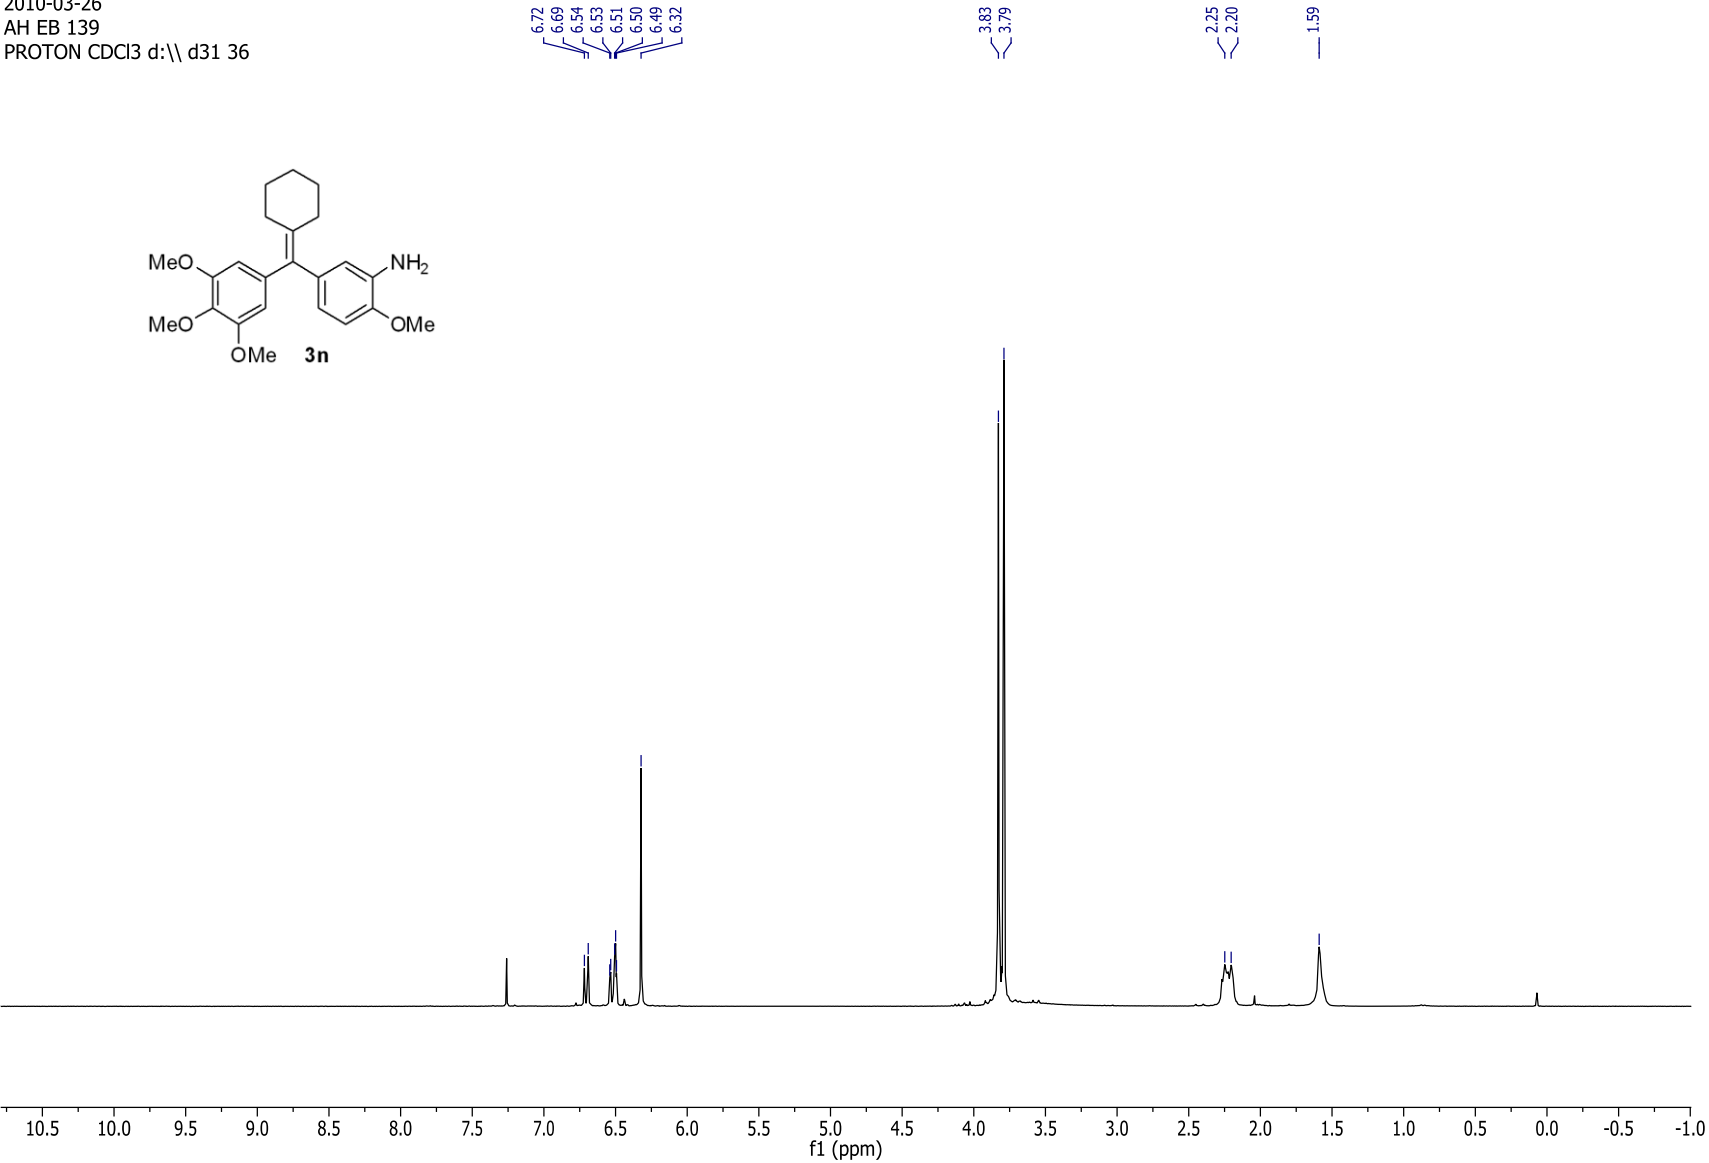

2010-03-26  
AH EB 139  
JMOD CDCl3 d:\ d31 36

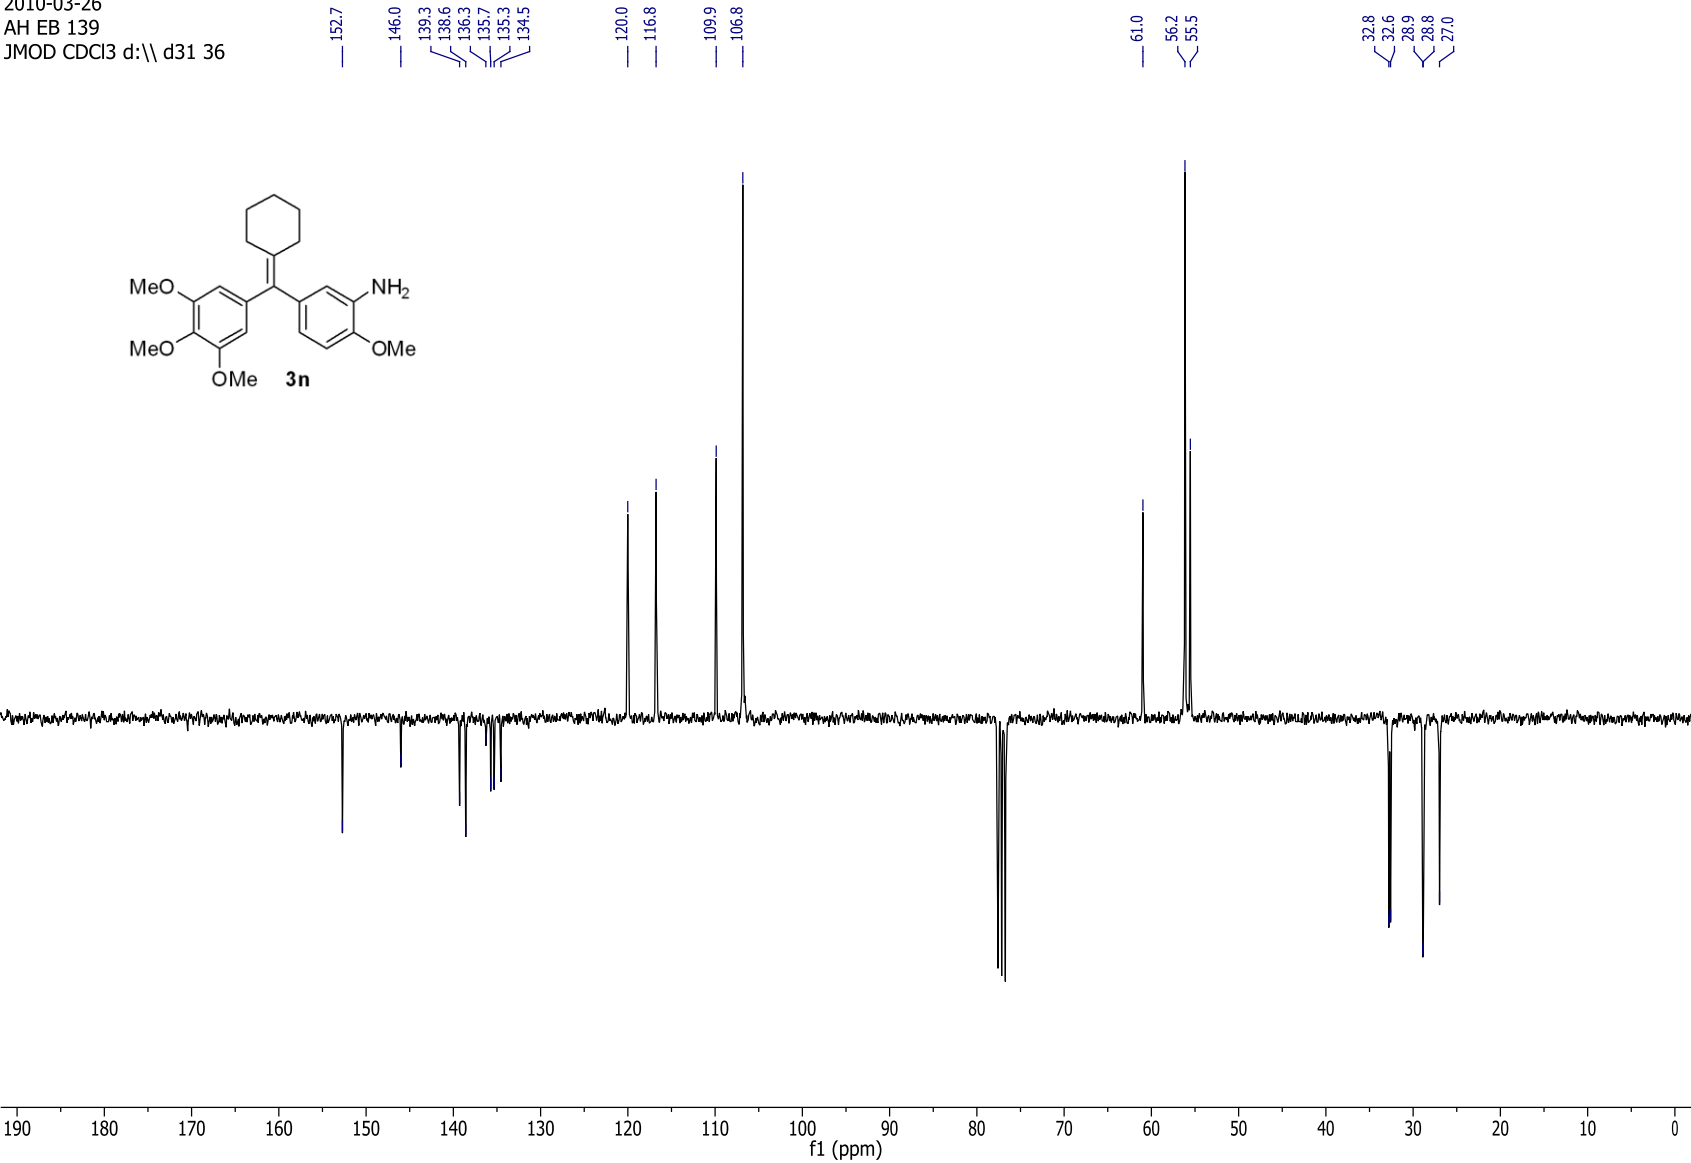

2010-05-17  
AHEB162  
PROTON CDCl3 d:\ d31 40

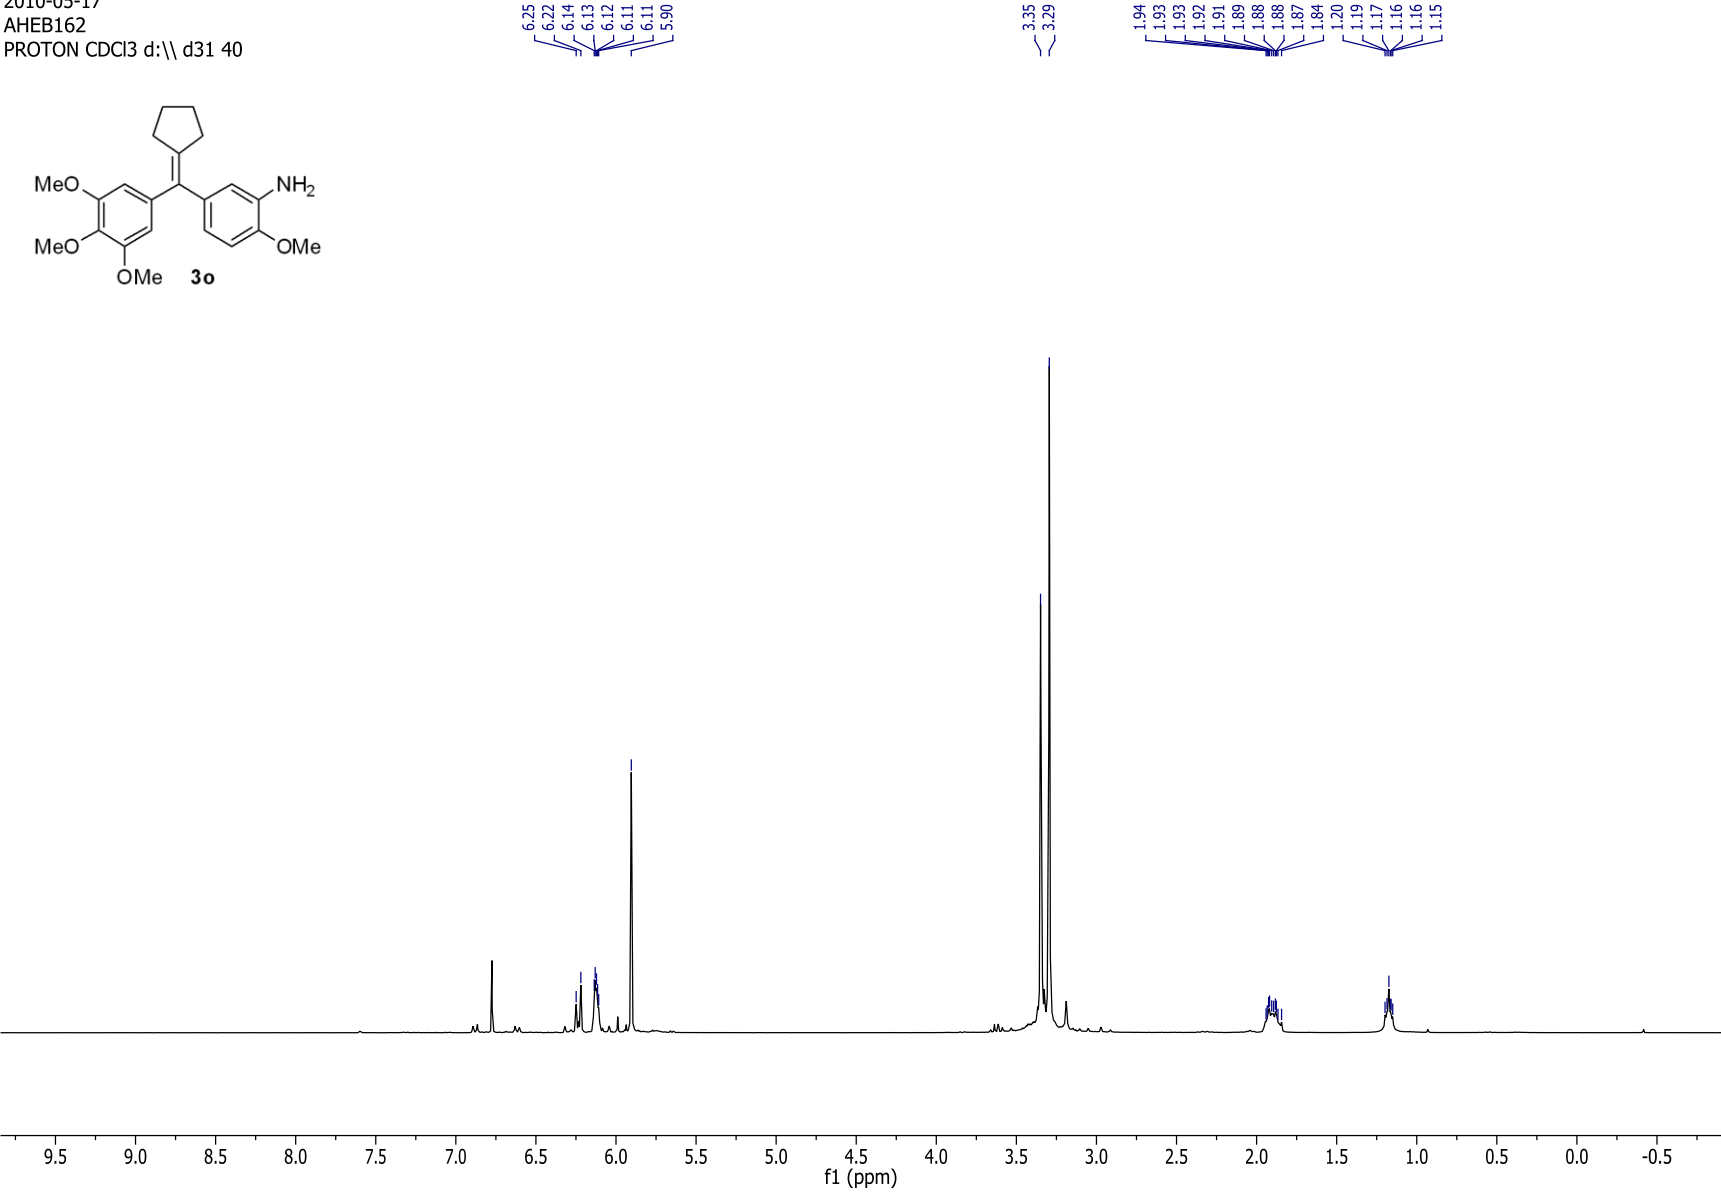



2010-05-17  
AHEB162  
JMOD CDCl3 d:\ d31 40

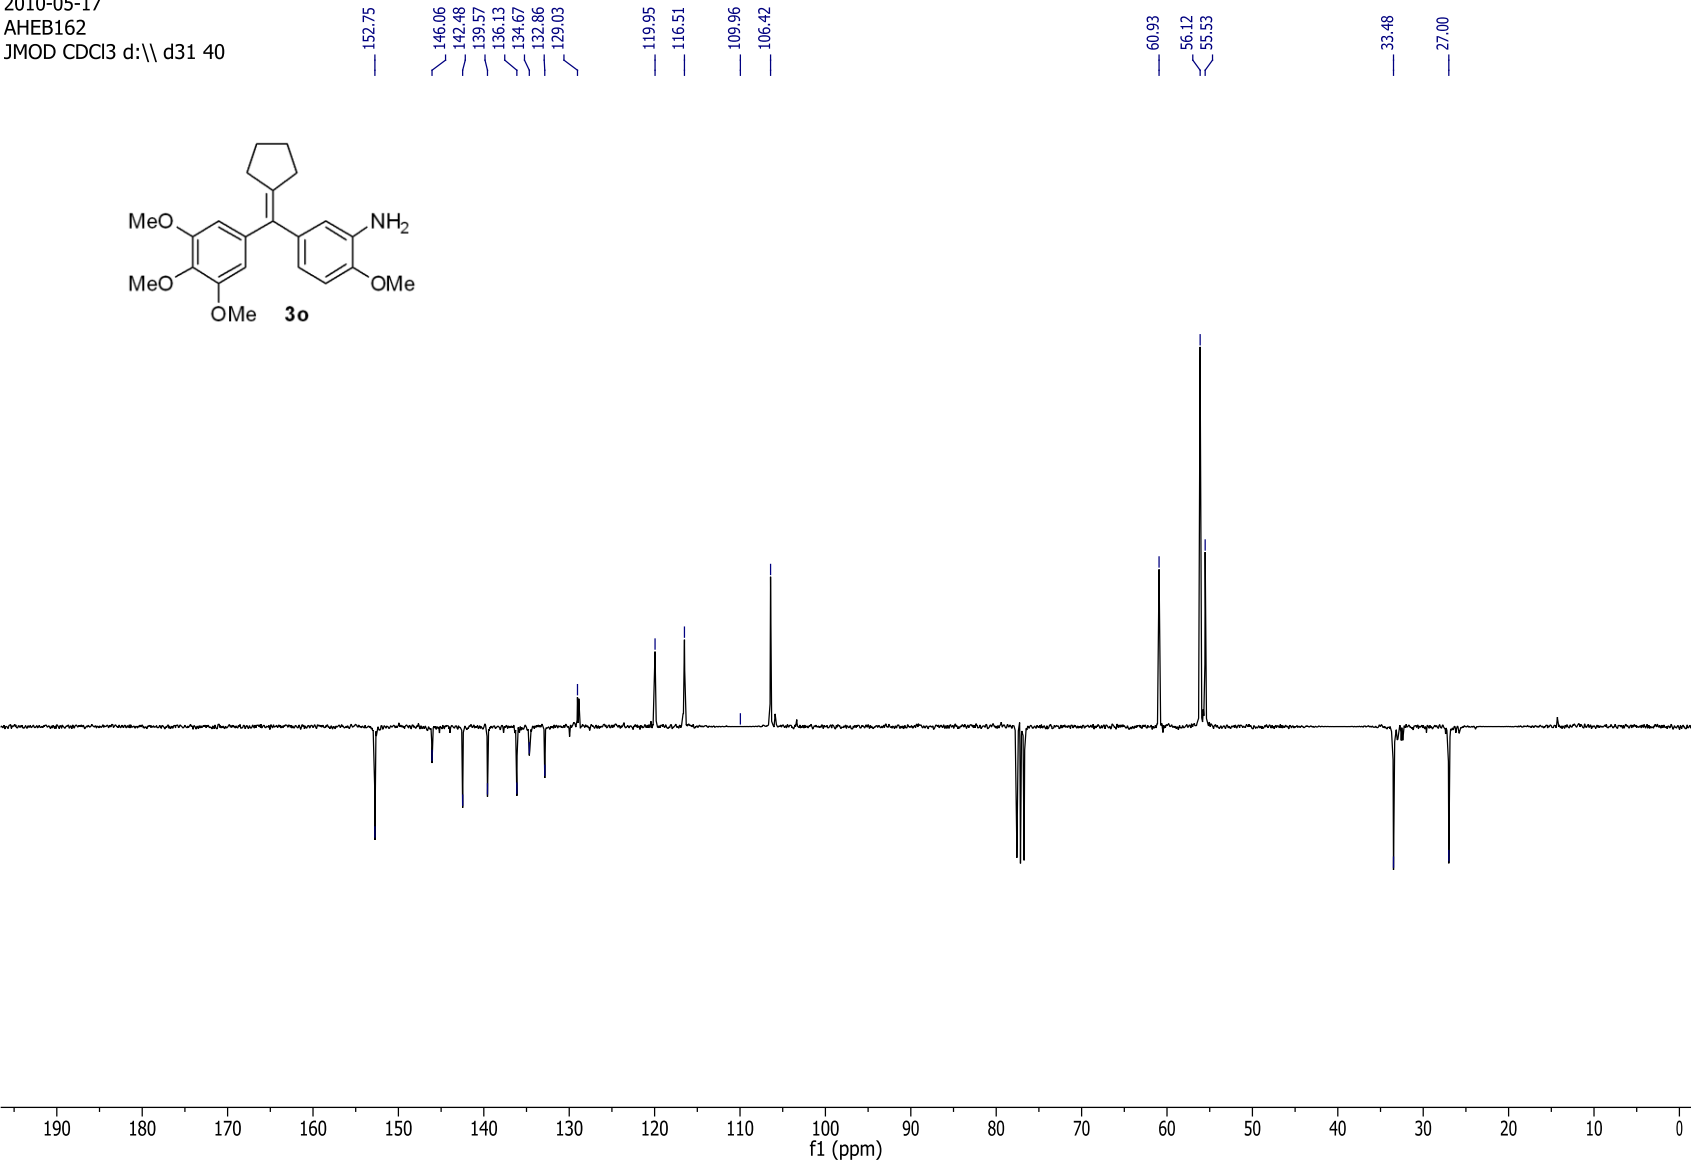

2010-03-29  
AHEB140  
PROTON CDCl3 d:\ d31 15

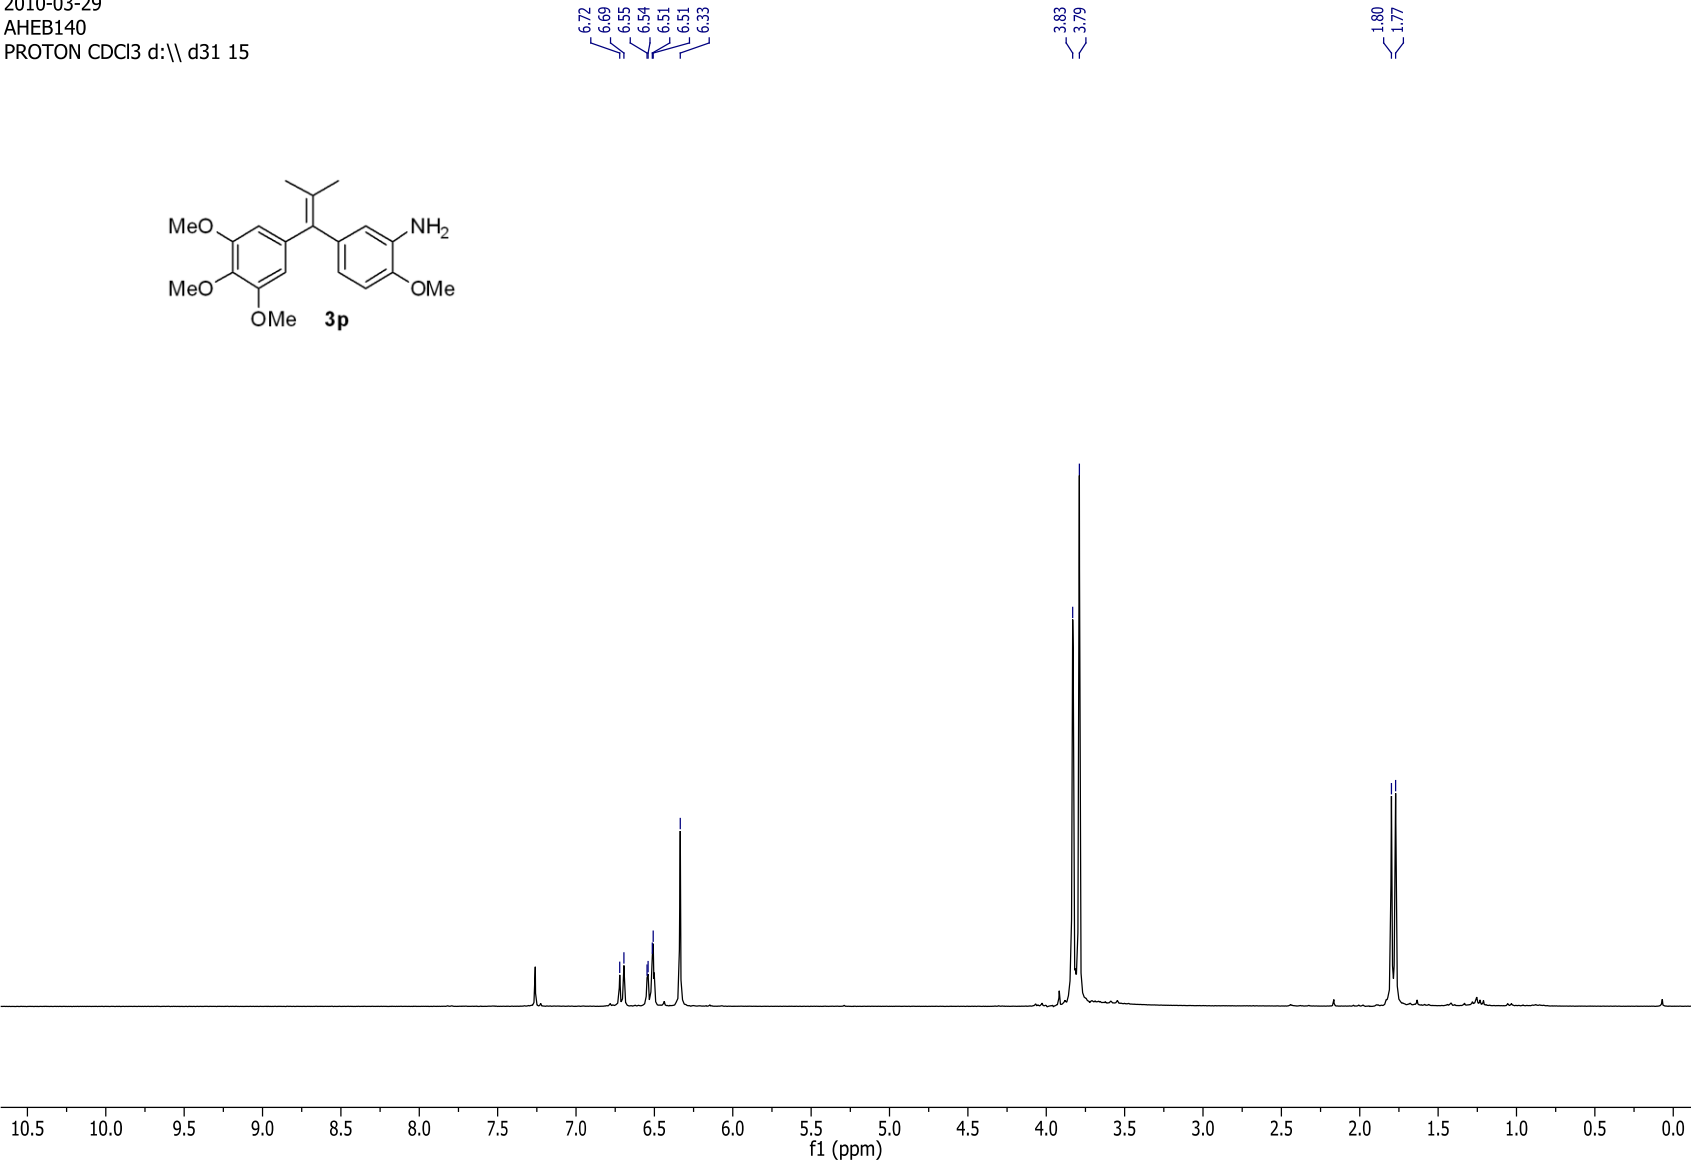

2010-03-29  
AHEB140  
JMOD CDCl3 d:\ d31 59

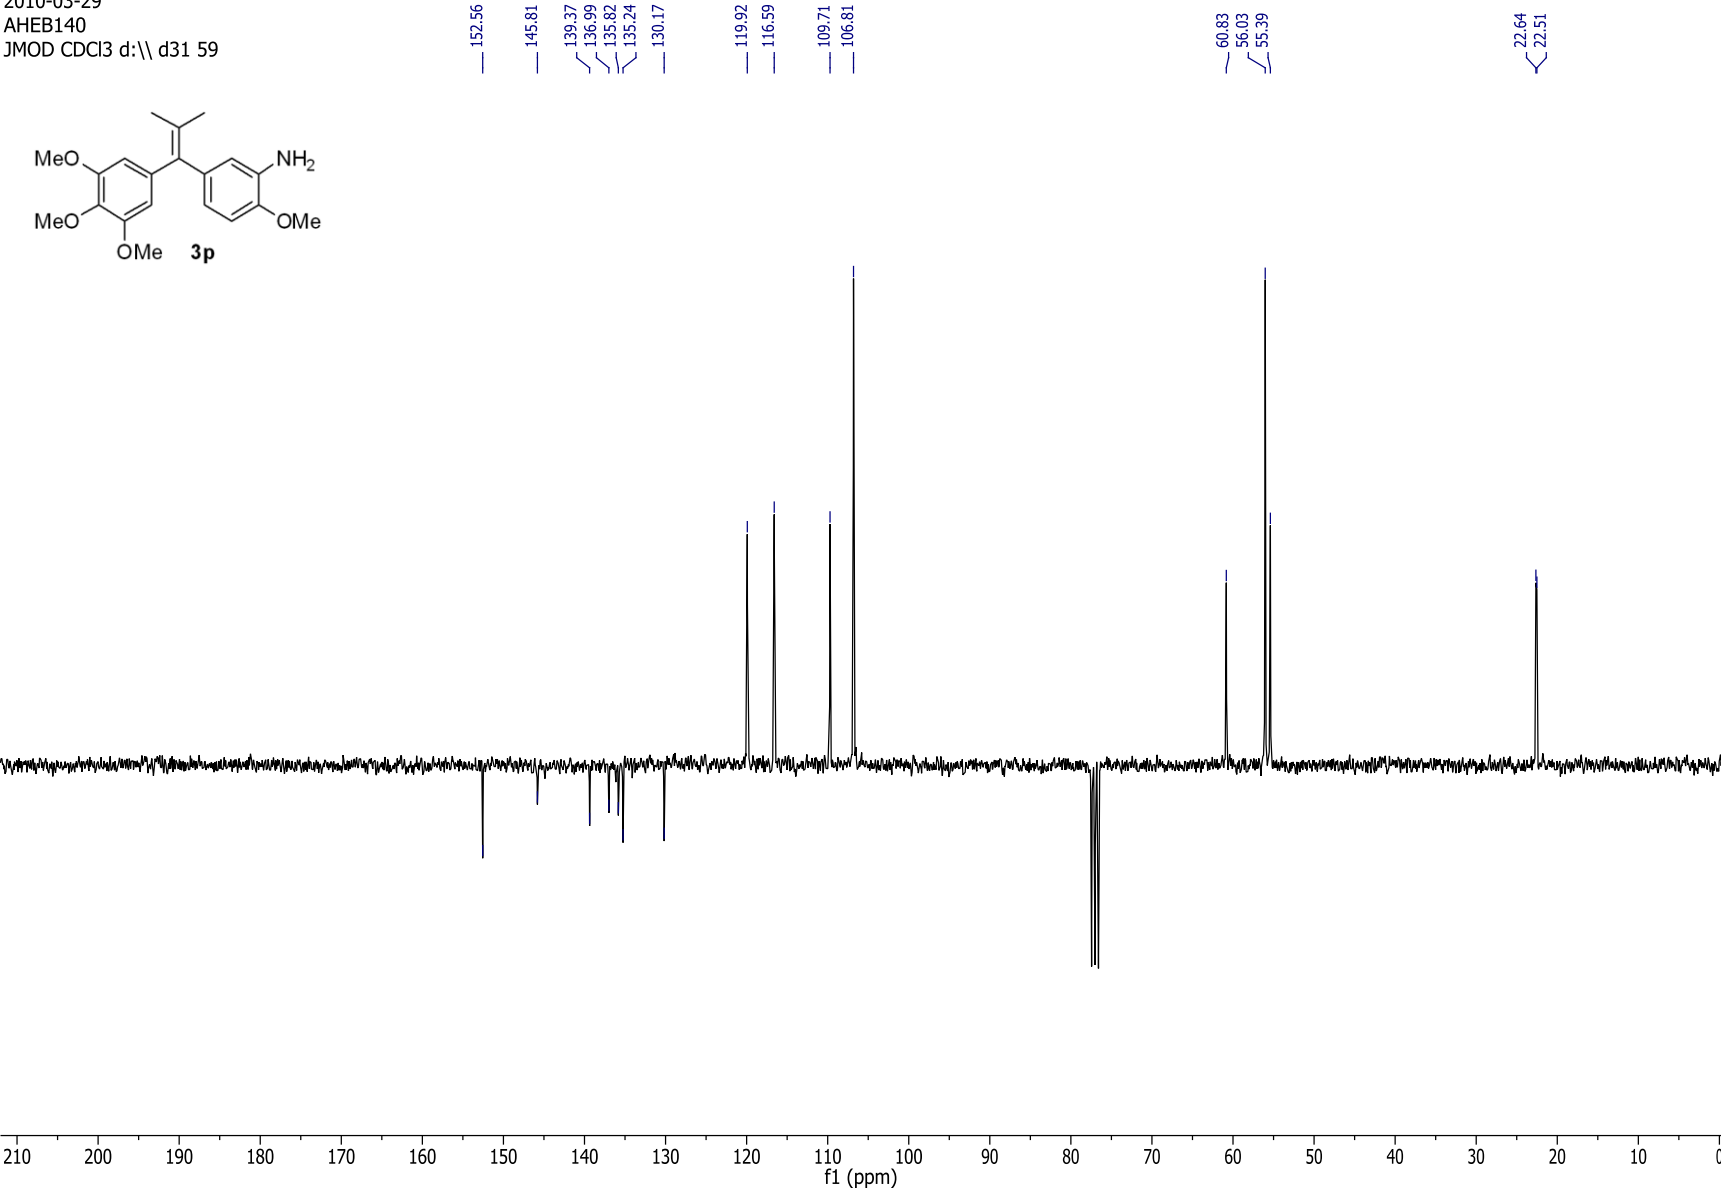

Supplement: c2ob26253c.pdf [file c2ob26253c.pdf]
